# Supplementary material
Source: publisher figshare collection journal article supplement (https://acs.figshare.com/ndownloader/files/10068664)
Supplement: Supplementary file 1 [file 10068664]

HEADER    TRANSFERASE                             12-JAN-17   5UI4              
TITLE     STRUCTURE OF NME1 COVALENTLY CONJUGATED TO IMIDAZOLE FLUOROSULFATE    
COMPND    MOL_ID: 1;                                                            
COMPND   2 MOLECULE: NUCLEOSIDE DIPHOSPHATE KINASE A;                           
COMPND   3 CHAIN: A, B, C, D, E, F;                                             
COMPND   4 SYNONYM: NDP KINASE A,GRANZYME A-ACTIVATED DNASE,GAAD,METASTASIS     
COMPND   5 INHIBITION FACTOR NM23,NM23-H1,TUMOR METASTATIC PROCESS-ASSOCIATED   
COMPND   6 PROTEIN;                                                             
COMPND   7 EC: 2.7.4.6;                                                         
COMPND   8 ENGINEERED: YES                                                      
SOURCE    MOL_ID: 1;                                                            
SOURCE   2 ORGANISM_SCIENTIFIC: HOMO SAPIENS;                                   
SOURCE   3 ORGANISM_COMMON: HUMAN;                                              
SOURCE   4 ORGANISM_TAXID: 9606;                                                
SOURCE   5 GENE: NME1, NDPKA, NM23;                                             
SOURCE   6 EXPRESSION_SYSTEM: ESCHERICHIA COLI;                                 
SOURCE   7 EXPRESSION_SYSTEM_TAXID: 562                                         
KEYWDS    ARYLFLUOROSULFATE, COVALENT, KINASE, TRANSFERASE                      
EXPDTA    X-RAY DIFFRACTION                                                     
AUTHOR    D.E.MORTENSON,G.J.BRIGHTY,I.A.WILSON,J.W.KELLY                        
JRNL        AUTH   D.E.MORTENSON,G.J.BRIGHTY,S.FORLI,G.BARE,L.PLATE,E.T.POWERS, 
JRNL        AUTH 2 A.J.OLSON,K.B.SHARPLESS,I.A.WILSON,J.W.KELLY                 
JRNL        TITL   PROTEOME-WIDE DISCOVERY OF PROTEINS THAT ACTIVATE THE        
JRNL        TITL 2 ARYLFLUOROSULFATE FUNCTIONAL GROUP TOWARD COVALENT CONJUGATE 
JRNL        TITL 3 FORMATION: TOWARD UNDERSTANDING THE IMPORTANCE OF NATIVE     
JRNL        TITL 4 PROTEIN STRUCTURE                                            
JRNL        REF    TO BE PUBLISHED                                              
JRNL        REFN                                                                
REMARK   2                                                                      
REMARK   2 RESOLUTION.    2.75 ANGSTROMS.                                       
REMARK   3                                                                      
REMARK   3 REFINEMENT.                                                          
REMARK   3   PROGRAM     : REFMAC 5.8.0135                                      
REMARK   3   AUTHORS     : MURSHUDOV,VAGIN,DODSON                               
REMARK   3                                                                      
REMARK   3    REFINEMENT TARGET : MAXIMUM LIKELIHOOD                            
REMARK   3                                                                      
REMARK   3  DATA USED IN REFINEMENT.                                            
REMARK   3   RESOLUTION RANGE HIGH (ANGSTROMS) : 2.75                           
REMARK   3   RESOLUTION RANGE LOW  (ANGSTROMS) : 59.81                          
REMARK   3   DATA CUTOFF            (SIGMA(F)) : NULL                           
REMARK   3   COMPLETENESS FOR RANGE        (%) : 96.7                           
REMARK   3   NUMBER OF REFLECTIONS             : 20995                          
REMARK   3                                                                      
REMARK   3  FIT TO DATA USED IN REFINEMENT.                                     
REMARK   3   CROSS-VALIDATION METHOD          : THROUGHOUT                      
REMARK   3   FREE R VALUE TEST SET SELECTION  : RANDOM                          
REMARK   3   R VALUE     (WORKING + TEST SET) : 0.195                           
REMARK   3   R VALUE            (WORKING SET) : 0.193                           
REMARK   3   FREE R VALUE                     : 0.223                           
REMARK   3   FREE R VALUE TEST SET SIZE   (%) : 5.100                           
REMARK   3   FREE R VALUE TEST SET COUNT      : 1134                            
REMARK   3                                                                      
REMARK   3  FIT IN THE HIGHEST RESOLUTION BIN.                                  
REMARK   3   TOTAL NUMBER OF BINS USED           : 20                           
REMARK   3   BIN RESOLUTION RANGE HIGH       (A) : 2.75                         
REMARK   3   BIN RESOLUTION RANGE LOW        (A) : 2.82                         
REMARK   3   REFLECTION IN BIN     (WORKING SET) : 1511                         
REMARK   3   BIN COMPLETENESS (WORKING+TEST) (%) : 96.56                        
REMARK   3   BIN R VALUE           (WORKING SET) : 0.3410                       
REMARK   3   BIN FREE R VALUE SET COUNT          : 91                           
REMARK   3   BIN FREE R VALUE                    : 0.3790                       
REMARK   3                                                                      
REMARK   3  NUMBER OF NON-HYDROGEN ATOMS USED IN REFINEMENT.                    
REMARK   3   PROTEIN ATOMS            : 7118                                    
REMARK   3   NUCLEIC ACID ATOMS       : 0                                       
REMARK   3   HETEROGEN ATOMS          : 156                                     
REMARK   3   SOLVENT ATOMS            : 99                                      
REMARK   3                                                                      
REMARK   3  B VALUES.                                                           
REMARK   3   FROM WILSON PLOT           (A**2) : 34.10                          
REMARK   3   MEAN B VALUE      (OVERALL, A**2) : 60.13                          
REMARK   3   OVERALL ANISOTROPIC B VALUE.                                       
REMARK   3    B11 (A**2) : -3.02000                                             
REMARK   3    B22 (A**2) : -0.18000                                             
REMARK   3    B33 (A**2) : -0.29000                                             
REMARK   3    B12 (A**2) : 1.15000                                              
REMARK   3    B13 (A**2) : 0.17000                                              
REMARK   3    B23 (A**2) : 1.63000                                              
REMARK   3                                                                      
REMARK   3  ESTIMATED OVERALL COORDINATE ERROR.                                 
REMARK   3   ESU BASED ON R VALUE                            (A): NULL          
REMARK   3   ESU BASED ON FREE R VALUE                       (A): 0.374         
REMARK   3   ESU BASED ON MAXIMUM LIKELIHOOD                 (A): 0.342         
REMARK   3   ESU FOR B VALUES BASED ON MAXIMUM LIKELIHOOD (A**2): 19.323        
REMARK   3                                                                      
REMARK   3 CORRELATION COEFFICIENTS.                                            
REMARK   3   CORRELATION COEFFICIENT FO-FC      : 0.944                         
REMARK   3   CORRELATION COEFFICIENT FO-FC FREE : 0.916                         
REMARK   3                                                                      
REMARK   3  RMS DEVIATIONS FROM IDEAL VALUES        COUNT    RMS    WEIGHT      
REMARK   3   BOND LENGTHS REFINED ATOMS        (A):  7461 ; 0.008 ; 0.019       
REMARK   3   BOND LENGTHS OTHERS               (A):  7067 ; 0.004 ; 0.020       
REMARK   3   BOND ANGLES REFINED ATOMS   (DEGREES): 10077 ; 1.202 ; 1.935       
REMARK   3   BOND ANGLES OTHERS          (DEGREES): 16238 ; 1.183 ; 3.000       
REMARK   3   TORSION ANGLES, PERIOD 1    (DEGREES):   880 ; 5.792 ; 5.000       
REMARK   3   TORSION ANGLES, PERIOD 2    (DEGREES):   345 ;35.732 ;23.913       
REMARK   3   TORSION ANGLES, PERIOD 3    (DEGREES):  1260 ;13.804 ;15.000       
REMARK   3   TORSION ANGLES, PERIOD 4    (DEGREES):    48 ;14.683 ;15.000       
REMARK   3   CHIRAL-CENTER RESTRAINTS       (A**3):  1053 ; 0.070 ; 0.200       
REMARK   3   GENERAL PLANES REFINED ATOMS      (A):  8993 ; 0.004 ; 0.020       
REMARK   3   GENERAL PLANES OTHERS             (A):  1767 ; 0.002 ; 0.020       
REMARK   3   NON-BONDED CONTACTS REFINED ATOMS (A):  NULL ;  NULL ;  NULL       
REMARK   3   NON-BONDED CONTACTS OTHERS        (A):  NULL ;  NULL ;  NULL       
REMARK   3   NON-BONDED TORSION REFINED ATOMS  (A):  NULL ;  NULL ;  NULL       
REMARK   3   NON-BONDED TORSION OTHERS         (A):  NULL ;  NULL ;  NULL       
REMARK   3   H-BOND (X...Y) REFINED ATOMS      (A):  NULL ;  NULL ;  NULL       
REMARK   3   H-BOND (X...Y) OTHERS             (A):  NULL ;  NULL ;  NULL       
REMARK   3   POTENTIAL METAL-ION REFINED ATOMS (A):  NULL ;  NULL ;  NULL       
REMARK   3   POTENTIAL METAL-ION OTHERS        (A):  NULL ;  NULL ;  NULL       
REMARK   3   SYMMETRY VDW REFINED ATOMS        (A):  NULL ;  NULL ;  NULL       
REMARK   3   SYMMETRY VDW OTHERS               (A):  NULL ;  NULL ;  NULL       
REMARK   3   SYMMETRY H-BOND REFINED ATOMS     (A):  NULL ;  NULL ;  NULL       
REMARK   3   SYMMETRY H-BOND OTHERS            (A):  NULL ;  NULL ;  NULL       
REMARK   3   SYMMETRY METAL-ION REFINED ATOMS  (A):  NULL ;  NULL ;  NULL       
REMARK   3   SYMMETRY METAL-ION OTHERS         (A):  NULL ;  NULL ;  NULL       
REMARK   3                                                                      
REMARK   3  ISOTROPIC THERMAL FACTOR RESTRAINTS.     COUNT   RMS    WEIGHT      
REMARK   3   MAIN-CHAIN BOND REFINED ATOMS  (A**2):  3580 ; 1.985 ; 5.932       
REMARK   3   MAIN-CHAIN BOND OTHER ATOMS    (A**2):  3579 ; 1.985 ; 5.932       
REMARK   3   MAIN-CHAIN ANGLE REFINED ATOMS (A**2):  4465 ; 3.284 ; 8.895       
REMARK   3   MAIN-CHAIN ANGLE OTHER ATOMS   (A**2):  4466 ; 3.284 ; 8.895       
REMARK   3   SIDE-CHAIN BOND REFINED ATOMS  (A**2):  3881 ; 2.126 ; 6.199       
REMARK   3   SIDE-CHAIN BOND OTHER ATOMS    (A**2):  3882 ; 2.125 ; 6.199       
REMARK   3   SIDE-CHAIN ANGLE REFINED ATOMS (A**2):  NULL ;  NULL ;  NULL       
REMARK   3   SIDE-CHAIN ANGLE OTHER ATOMS   (A**2):  5612 ; 3.644 ; 9.219       
REMARK   3   LONG RANGE B REFINED ATOMS     (A**2):  8016 ; 5.501 ;46.658       
REMARK   3   LONG RANGE B OTHER ATOMS       (A**2):  8003 ; 5.496 ;46.670       
REMARK   3                                                                      
REMARK   3 ANISOTROPIC THERMAL FACTOR RESTRAINTS.    COUNT   RMS   WEIGHT       
REMARK   3   RIGID-BOND RESTRAINTS          (A**2):  NULL ;  NULL ;  NULL       
REMARK   3   SPHERICITY; FREE ATOMS         (A**2):  NULL ;  NULL ;  NULL       
REMARK   3   SPHERICITY; BONDED ATOMS       (A**2):  NULL ;  NULL ;  NULL       
REMARK   3                                                                      
REMARK   3  NCS RESTRAINTS STATISTICS                                           
REMARK   3   NCS TYPE: LOCAL                                                    
REMARK   3   NUMBER OF DIFFERENT NCS PAIRS  : 15                                
REMARK   3  GROUP  CHAIN1    RANGE     CHAIN2     RANGE    COUNT RMS  WEIGHT    
REMARK   3    1     A    13    150       B    13    150   16108  0.05  0.05     
REMARK   3    2     A    13    151       C    13    151   16150  0.05  0.05     
REMARK   3    3     A    13    150       D    13    150   15988  0.06  0.05     
REMARK   3    4     A    13    151       E    13    151   16292  0.05  0.05     
REMARK   3    5     A    13    151       F    13    151   16142  0.06  0.05     
REMARK   3    6     B    13    150       C    13    150   16012  0.05  0.05     
REMARK   3    7     B    13    152       D    13    152   16172  0.06  0.05     
REMARK   3    8     B    13    150       E    13    150   16090  0.05  0.05     
REMARK   3    9     B    13    150       F    13    150   16030  0.06  0.05     
REMARK   3   10     C    13    150       D    13    150   15858  0.05  0.05     
REMARK   3   11     C    13    151       E    13    151   16118  0.05  0.05     
REMARK   3   12     C    13    151       F    13    151   16244  0.05  0.05     
REMARK   3   13     D    13    150       E    13    150   15986  0.05  0.05     
REMARK   3   14     D    13    150       F    13    150   15892  0.05  0.05     
REMARK   3   15     E    13    151       F    13    151   16124  0.06  0.05     
REMARK   3                                                                      
REMARK   3  TLS DETAILS                                                         
REMARK   3   NUMBER OF TLS GROUPS  : NULL                                       
REMARK   3                                                                      
REMARK   3  BULK SOLVENT MODELLING.                                             
REMARK   3   METHOD USED : MASK                                                 
REMARK   3   PARAMETERS FOR MASK CALCULATION                                    
REMARK   3   VDW PROBE RADIUS   : 1.20                                          
REMARK   3   ION PROBE RADIUS   : 0.80                                          
REMARK   3   SHRINKAGE RADIUS   : 0.80                                          
REMARK   3                                                                      
REMARK   3  OTHER REFINEMENT REMARKS: HYDROGENS HAVE BEEN ADDED IN THE RIDING   
REMARK   3  POSITIONS                                                           
REMARK   4                                                                      
REMARK   4 5UI4 COMPLIES WITH FORMAT V. 3.30, 13-JUL-11                         
REMARK 100                                                                      
REMARK 100 THIS ENTRY HAS BEEN PROCESSED BY RCSB ON 23-JAN-17.                  
REMARK 100 THE DEPOSITION ID IS D_1000225912.                                   
REMARK 200                                                                      
REMARK 200 EXPERIMENTAL DETAILS                                                 
REMARK 200  EXPERIMENT TYPE                : X-RAY DIFFRACTION                  
REMARK 200  DATE OF DATA COLLECTION        : 12-DEC-16                          
REMARK 200  TEMPERATURE           (KELVIN) : 100                                
REMARK 200  PH                             : NULL                               
REMARK 200  NUMBER OF CRYSTALS USED        : 1                                  
REMARK 200                                                                      
REMARK 200  SYNCHROTRON              (Y/N) : N                                  
REMARK 200  RADIATION SOURCE               : ROTATING ANODE                     
REMARK 200  BEAMLINE                       : NULL                               
REMARK 200  X-RAY GENERATOR MODEL          : RIGAKU MICROMAX-007 HF             
REMARK 200  MONOCHROMATIC OR LAUE    (M/L) : M                                  
REMARK 200  WAVELENGTH OR RANGE        (A) : 1.5418                             
REMARK 200  MONOCHROMATOR                  : NULL                               
REMARK 200  OPTICS                         : NULL                               
REMARK 200                                                                      
REMARK 200  DETECTOR TYPE                  : IMAGE PLATE                        
REMARK 200  DETECTOR MANUFACTURER          : MAR SCANNER 345 MM PLATE           
REMARK 200  INTENSITY-INTEGRATION SOFTWARE : XDS                                
REMARK 200  DATA SCALING SOFTWARE          : SCALA                              
REMARK 200                                                                      
REMARK 200  NUMBER OF UNIQUE REFLECTIONS   : 22132                              
REMARK 200  RESOLUTION RANGE HIGH      (A) : 2.750                              
REMARK 200  RESOLUTION RANGE LOW       (A) : 59.810                             
REMARK 200  REJECTION CRITERIA  (SIGMA(I)) : NULL                               
REMARK 200                                                                      
REMARK 200 OVERALL.                                                             
REMARK 200  COMPLETENESS FOR RANGE     (%) : 96.7                               
REMARK 200  DATA REDUNDANCY                : 2.600                              
REMARK 200  R MERGE                    (I) : NULL                               
REMARK 200  R SYM                      (I) : 0.12800                            
REMARK 200  <I/SIGMA(I)> FOR THE DATA SET  : 7.7000                             
REMARK 200                                                                      
REMARK 200 IN THE HIGHEST RESOLUTION SHELL.                                     
REMARK 200  HIGHEST RESOLUTION SHELL, RANGE HIGH (A) : 2.75                     
REMARK 200  HIGHEST RESOLUTION SHELL, RANGE LOW  (A) : 2.90                     
REMARK 200  COMPLETENESS FOR SHELL     (%) : 95.9                               
REMARK 200  DATA REDUNDANCY IN SHELL       : 2.60                               
REMARK 200  R MERGE FOR SHELL          (I) : NULL                               
REMARK 200  R SYM FOR SHELL            (I) : 0.76300                            
REMARK 200  <I/SIGMA(I)> FOR SHELL         : 1.400                              
REMARK 200                                                                      
REMARK 200 DIFFRACTION PROTOCOL: SINGLE WAVELENGTH                              
REMARK 200 METHOD USED TO DETERMINE THE STRUCTURE: MOLECULAR REPLACEMENT        
REMARK 200 SOFTWARE USED: PHASER                                                
REMARK 200 STARTING MODEL: 2HVE                                                 
REMARK 200                                                                      
REMARK 200 REMARK: NULL                                                         
REMARK 280                                                                      
REMARK 280 CRYSTAL                                                              
REMARK 280 SOLVENT CONTENT, VS   (%): 41.72                                     
REMARK 280 MATTHEWS COEFFICIENT, VM (ANGSTROMS**3/DA): 2.11                     
REMARK 280                                                                      
REMARK 280 CRYSTALLIZATION CONDITIONS: 4.7 MG/ML SOLUTION PROTEIN               
REMARK 280  -FLUOROSULFATE CONJUGATE COMBINED WITH SOLUTION CONTAINING 0.2 M    
REMARK 280  NACL, 0.1 M HEPES PH 7.5 AND 30% (V/V) PEG400 IN SITTING DROPS.     
REMARK 280  CRYSTALS FROZEN IN LN2 STREAM WITHOUT ADDITIONAL CRYOPROTECTANT,    
REMARK 280  VAPOR DIFFUSION, SITTING DROP, TEMPERATURE 298K                     
REMARK 290                                                                      
REMARK 290 CRYSTALLOGRAPHIC SYMMETRY                                            
REMARK 290 SYMMETRY OPERATORS FOR SPACE GROUP: P 1                              
REMARK 290                                                                      
REMARK 290      SYMOP   SYMMETRY                                                
REMARK 290     NNNMMM   OPERATOR                                                
REMARK 290       1555   X,Y,Z                                                   
REMARK 290                                                                      
REMARK 290     WHERE NNN -> OPERATOR NUMBER                                     
REMARK 290           MMM -> TRANSLATION VECTOR                                  
REMARK 290                                                                      
REMARK 290 CRYSTALLOGRAPHIC SYMMETRY TRANSFORMATIONS                            
REMARK 290 THE FOLLOWING TRANSFORMATIONS OPERATE ON THE ATOM/HETATM             
REMARK 290 RECORDS IN THIS ENTRY TO PRODUCE CRYSTALLOGRAPHICALLY                
REMARK 290 RELATED MOLECULES.                                                   
REMARK 290   SMTRY1   1  1.000000  0.000000  0.000000        0.00000            
REMARK 290   SMTRY2   1  0.000000  1.000000  0.000000        0.00000            
REMARK 290   SMTRY3   1  0.000000  0.000000  1.000000        0.00000            
REMARK 290                                                                      
REMARK 290 REMARK: NULL                                                         
REMARK 300                                                                      
REMARK 300 BIOMOLECULE: 1                                                       
REMARK 300 SEE REMARK 350 FOR THE AUTHOR PROVIDED AND/OR PROGRAM                
REMARK 300 GENERATED ASSEMBLY INFORMATION FOR THE STRUCTURE IN                  
REMARK 300 THIS ENTRY. THE REMARK MAY ALSO PROVIDE INFORMATION ON               
REMARK 300 BURIED SURFACE AREA.                                                 
REMARK 350                                                                      
REMARK 350 COORDINATES FOR A COMPLETE MULTIMER REPRESENTING THE KNOWN           
REMARK 350 BIOLOGICALLY SIGNIFICANT OLIGOMERIZATION STATE OF THE                
REMARK 350 MOLECULE CAN BE GENERATED BY APPLYING BIOMT TRANSFORMATIONS          
REMARK 350 GIVEN BELOW.  BOTH NON-CRYSTALLOGRAPHIC AND                          
REMARK 350 CRYSTALLOGRAPHIC OPERATIONS ARE GIVEN.                               
REMARK 350                                                                      
REMARK 350 BIOMOLECULE: 1                                                       
REMARK 350 AUTHOR DETERMINED BIOLOGICAL UNIT: HEXAMERIC                         
REMARK 350 SOFTWARE DETERMINED QUATERNARY STRUCTURE: HEXAMERIC                  
REMARK 350 SOFTWARE USED: PISA                                                  
REMARK 350 TOTAL BURIED SURFACE AREA: 15660 ANGSTROM**2                         
REMARK 350 SURFACE AREA OF THE COMPLEX: 33650 ANGSTROM**2                       
REMARK 350 CHANGE IN SOLVENT FREE ENERGY: -101.0 KCAL/MOL                       
REMARK 350 APPLY THE FOLLOWING TO CHAINS: A, D, B, F, C, E                      
REMARK 350   BIOMT1   1  1.000000  0.000000  0.000000        0.00000            
REMARK 350   BIOMT2   1  0.000000  1.000000  0.000000        0.00000            
REMARK 350   BIOMT3   1  0.000000  0.000000  1.000000        0.00000            
REMARK 465                                                                      
REMARK 465 MISSING RESIDUES                                                     
REMARK 465 THE FOLLOWING RESIDUES WERE NOT LOCATED IN THE                       
REMARK 465 EXPERIMENT. (M=MODEL NUMBER; RES=RESIDUE NAME; C=CHAIN               
REMARK 465 IDENTIFIER; SSSEQ=SEQUENCE NUMBER; I=INSERTION CODE.)                
REMARK 465                                                                      
REMARK 465   M RES C SSSEQI                                                     
REMARK 465     MET A    -6                                                      
REMARK 465     HIS A    -5                                                      
REMARK 465     HIS A    -4                                                      
REMARK 465     HIS A    -3                                                      
REMARK 465     HIS A    -2                                                      
REMARK 465     HIS A    -1                                                      
REMARK 465     HIS A     0                                                      
REMARK 465     MET A     1                                                      
REMARK 465     ALA A     2                                                      
REMARK 465     GLU A   152                                                      
REMARK 465     MET B    -6                                                      
REMARK 465     HIS B    -5                                                      
REMARK 465     HIS B    -4                                                      
REMARK 465     HIS B    -3                                                      
REMARK 465     HIS B    -2                                                      
REMARK 465     HIS B    -1                                                      
REMARK 465     HIS B     0                                                      
REMARK 465     MET B     1                                                      
REMARK 465     ALA B     2                                                      
REMARK 465     MET C    -6                                                      
REMARK 465     HIS C    -5                                                      
REMARK 465     HIS C    -4                                                      
REMARK 465     HIS C    -3                                                      
REMARK 465     HIS C    -2                                                      
REMARK 465     HIS C    -1                                                      
REMARK 465     HIS C     0                                                      
REMARK 465     MET C     1                                                      
REMARK 465     ALA C     2                                                      
REMARK 465     GLU C   152                                                      
REMARK 465     MET D    -6                                                      
REMARK 465     HIS D    -5                                                      
REMARK 465     HIS D    -4                                                      
REMARK 465     HIS D    -3                                                      
REMARK 465     HIS D    -2                                                      
REMARK 465     HIS D    -1                                                      
REMARK 465     HIS D     0                                                      
REMARK 465     MET D     1                                                      
REMARK 465     ALA D     2                                                      
REMARK 465     MET E    -6                                                      
REMARK 465     HIS E    -5                                                      
REMARK 465     HIS E    -4                                                      
REMARK 465     HIS E    -3                                                      
REMARK 465     HIS E    -2                                                      
REMARK 465     HIS E    -1                                                      
REMARK 465     HIS E     0                                                      
REMARK 465     MET E     1                                                      
REMARK 465     ALA E     2                                                      
REMARK 465     GLU E   152                                                      
REMARK 465     MET F    -6                                                      
REMARK 465     HIS F    -5                                                      
REMARK 465     HIS F    -4                                                      
REMARK 465     HIS F    -3                                                      
REMARK 465     HIS F    -2                                                      
REMARK 465     HIS F    -1                                                      
REMARK 465     HIS F     0                                                      
REMARK 465     MET F     1                                                      
REMARK 465     ALA F     2                                                      
REMARK 465     GLU F   152                                                      
REMARK 500                                                                      
REMARK 500 GEOMETRY AND STEREOCHEMISTRY                                         
REMARK 500 SUBTOPIC: TORSION ANGLES                                             
REMARK 500                                                                      
REMARK 500 TORSION ANGLES OUTSIDE THE EXPECTED RAMACHANDRAN REGIONS:            
REMARK 500 (M=MODEL NUMBER; RES=RESIDUE NAME; C=CHAIN IDENTIFIER;               
REMARK 500 SSEQ=SEQUENCE NUMBER; I=INSERTION CODE).                             
REMARK 500                                                                      
REMARK 500 STANDARD TABLE:                                                      
REMARK 500 FORMAT:(10X,I3,1X,A3,1X,A1,I4,A1,4X,F7.2,3X,F7.2)                    
REMARK 500                                                                      
REMARK 500 EXPECTED VALUES: GJ KLEYWEGT AND TA JONES (1996). PHI/PSI-           
REMARK 500 CHOLOGY: RAMACHANDRAN REVISITED. STRUCTURE 4, 1395 - 1400            
REMARK 500                                                                      
REMARK 500  M RES CSSEQI        PSI       PHI                                   
REMARK 500    TYR A  52       35.88    -98.06                                   
REMARK 500    ASP A  57       51.65   -105.36                                   
REMARK 500    ILE A 116      -21.39     53.21                                   
REMARK 500    TYR B  52       35.86    -97.61                                   
REMARK 500    ASP B  57       51.84   -103.63                                   
REMARK 500    ILE B 116      -21.03     52.70                                   
REMARK 500    TYR C  52       35.92    -97.54                                   
REMARK 500    ASP C  57       51.47   -104.09                                   
REMARK 500    ILE C 110      -53.96   -120.10                                   
REMARK 500    ILE C 116      -21.78     53.27                                   
REMARK 500    CYS D   4       50.54   -115.90                                   
REMARK 500    TYR D  52       36.01    -98.04                                   
REMARK 500    ASP D  57       50.87   -104.10                                   
REMARK 500    ILE D 116      -21.91     53.34                                   
REMARK 500    TYR E  52       36.30    -98.03                                   
REMARK 500    ASP E  57       52.66   -105.86                                   
REMARK 500    ILE E 116      -22.15     53.85                                   
REMARK 500    TYR F  52       35.97    -98.01                                   
REMARK 500    ASP F  57       51.79   -104.10                                   
REMARK 500    ILE F 116      -22.10     53.64                                   
REMARK 500                                                                      
REMARK 500 REMARK: NULL                                                         
REMARK 800                                                                      
REMARK 800 SITE                                                                 
REMARK 800 SITE_IDENTIFIER: AC1                                                 
REMARK 800 EVIDENCE_CODE: SOFTWARE                                              
REMARK 800 SITE_DESCRIPTION: binding site for residue A7Z A 201                 
REMARK 800                                                                      
REMARK 800 SITE_IDENTIFIER: AC2                                                 
REMARK 800 EVIDENCE_CODE: SOFTWARE                                              
REMARK 800 SITE_DESCRIPTION: binding site for Di-peptide A7Z B 201 and LYS B    
REMARK 800  12                                                                  
REMARK 800                                                                      
REMARK 800 SITE_IDENTIFIER: AC3                                                 
REMARK 800 EVIDENCE_CODE: SOFTWARE                                              
REMARK 800 SITE_DESCRIPTION: binding site for Di-peptide A7Z C 201 and LYS C    
REMARK 800  12                                                                  
REMARK 800                                                                      
REMARK 800 SITE_IDENTIFIER: AC4                                                 
REMARK 800 EVIDENCE_CODE: SOFTWARE                                              
REMARK 800 SITE_DESCRIPTION: binding site for Di-peptide A7Z D 201 and LYS D    
REMARK 800  12                                                                  
REMARK 800                                                                      
REMARK 800 SITE_IDENTIFIER: AC5                                                 
REMARK 800 EVIDENCE_CODE: SOFTWARE                                              
REMARK 800 SITE_DESCRIPTION: binding site for Di-peptide A7Z E 201 and LYS E    
REMARK 800  12                                                                  
REMARK 800                                                                      
REMARK 800 SITE_IDENTIFIER: AC6                                                 
REMARK 800 EVIDENCE_CODE: SOFTWARE                                              
REMARK 800 SITE_DESCRIPTION: binding site for Di-peptide A7Z F 201 and LYS F    
REMARK 800  12                                                                  
DBREF  5UI4 A    1   152  UNP    P15531   NDKA_HUMAN       1    152             
DBREF  5UI4 B    1   152  UNP    P15531   NDKA_HUMAN       1    152             
DBREF  5UI4 C    1   152  UNP    P15531   NDKA_HUMAN       1    152             
DBREF  5UI4 D    1   152  UNP    P15531   NDKA_HUMAN       1    152             
DBREF  5UI4 E    1   152  UNP    P15531   NDKA_HUMAN       1    152             
DBREF  5UI4 F    1   152  UNP    P15531   NDKA_HUMAN       1    152             
SEQADV 5UI4 MET A   -6  UNP  P15531              EXPRESSION TAG                 
SEQADV 5UI4 HIS A   -5  UNP  P15531              EXPRESSION TAG                 
SEQADV 5UI4 HIS A   -4  UNP  P15531              EXPRESSION TAG                 
SEQADV 5UI4 HIS A   -3  UNP  P15531              EXPRESSION TAG                 
SEQADV 5UI4 HIS A   -2  UNP  P15531              EXPRESSION TAG                 
SEQADV 5UI4 HIS A   -1  UNP  P15531              EXPRESSION TAG                 
SEQADV 5UI4 HIS A    0  UNP  P15531              EXPRESSION TAG                 
SEQADV 5UI4 MET B   -6  UNP  P15531              EXPRESSION TAG                 
SEQADV 5UI4 HIS B   -5  UNP  P15531              EXPRESSION TAG                 
SEQADV 5UI4 HIS B   -4  UNP  P15531              EXPRESSION TAG                 
SEQADV 5UI4 HIS B   -3  UNP  P15531              EXPRESSION TAG                 
SEQADV 5UI4 HIS B   -2  UNP  P15531              EXPRESSION TAG                 
SEQADV 5UI4 HIS B   -1  UNP  P15531              EXPRESSION TAG                 
SEQADV 5UI4 HIS B    0  UNP  P15531              EXPRESSION TAG                 
SEQADV 5UI4 MET C   -6  UNP  P15531              EXPRESSION TAG                 
SEQADV 5UI4 HIS C   -5  UNP  P15531              EXPRESSION TAG                 
SEQADV 5UI4 HIS C   -4  UNP  P15531              EXPRESSION TAG                 
SEQADV 5UI4 HIS C   -3  UNP  P15531              EXPRESSION TAG                 
SEQADV 5UI4 HIS C   -2  UNP  P15531              EXPRESSION TAG                 
SEQADV 5UI4 HIS C   -1  UNP  P15531              EXPRESSION TAG                 
SEQADV 5UI4 HIS C    0  UNP  P15531              EXPRESSION TAG                 
SEQADV 5UI4 MET D   -6  UNP  P15531              EXPRESSION TAG                 
SEQADV 5UI4 HIS D   -5  UNP  P15531              EXPRESSION TAG                 
SEQADV 5UI4 HIS D   -4  UNP  P15531              EXPRESSION TAG                 
SEQADV 5UI4 HIS D   -3  UNP  P15531              EXPRESSION TAG                 
SEQADV 5UI4 HIS D   -2  UNP  P15531              EXPRESSION TAG                 
SEQADV 5UI4 HIS D   -1  UNP  P15531              EXPRESSION TAG                 
SEQADV 5UI4 HIS D    0  UNP  P15531              EXPRESSION TAG                 
SEQADV 5UI4 MET E   -6  UNP  P15531              EXPRESSION TAG                 
SEQADV 5UI4 HIS E   -5  UNP  P15531              EXPRESSION TAG                 
SEQADV 5UI4 HIS E   -4  UNP  P15531              EXPRESSION TAG                 
SEQADV 5UI4 HIS E   -3  UNP  P15531              EXPRESSION TAG                 
SEQADV 5UI4 HIS E   -2  UNP  P15531              EXPRESSION TAG                 
SEQADV 5UI4 HIS E   -1  UNP  P15531              EXPRESSION TAG                 
SEQADV 5UI4 HIS E    0  UNP  P15531              EXPRESSION TAG                 
SEQADV 5UI4 MET F   -6  UNP  P15531              EXPRESSION TAG                 
SEQADV 5UI4 HIS F   -5  UNP  P15531              EXPRESSION TAG                 
SEQADV 5UI4 HIS F   -4  UNP  P15531              EXPRESSION TAG                 
SEQADV 5UI4 HIS F   -3  UNP  P15531              EXPRESSION TAG                 
SEQADV 5UI4 HIS F   -2  UNP  P15531              EXPRESSION TAG                 
SEQADV 5UI4 HIS F   -1  UNP  P15531              EXPRESSION TAG                 
SEQADV 5UI4 HIS F    0  UNP  P15531              EXPRESSION TAG                 
SEQRES   1 A  159  MET HIS HIS HIS HIS HIS HIS MET ALA ASN CYS GLU ARG          
SEQRES   2 A  159  THR PHE ILE ALA ILE LYS PRO ASP GLY VAL GLN ARG GLY          
SEQRES   3 A  159  LEU VAL GLY GLU ILE ILE LYS ARG PHE GLU GLN LYS GLY          
SEQRES   4 A  159  PHE ARG LEU VAL GLY LEU LYS PHE MET GLN ALA SER GLU          
SEQRES   5 A  159  ASP LEU LEU LYS GLU HIS TYR VAL ASP LEU LYS ASP ARG          
SEQRES   6 A  159  PRO PHE PHE ALA GLY LEU VAL LYS TYR MET HIS SER GLY          
SEQRES   7 A  159  PRO VAL VAL ALA MET VAL TRP GLU GLY LEU ASN VAL VAL          
SEQRES   8 A  159  LYS THR GLY ARG VAL MET LEU GLY GLU THR ASN PRO ALA          
SEQRES   9 A  159  ASP SER LYS PRO GLY THR ILE ARG GLY ASP PHE CYS ILE          
SEQRES  10 A  159  GLN VAL GLY ARG ASN ILE ILE HIS GLY SER ASP SER VAL          
SEQRES  11 A  159  GLU SER ALA GLU LYS GLU ILE GLY LEU TRP PHE HIS PRO          
SEQRES  12 A  159  GLU GLU LEU VAL ASP TYR THR SER CYS ALA GLN ASN TRP          
SEQRES  13 A  159  ILE TYR GLU                                                  
SEQRES   1 B  159  MET HIS HIS HIS HIS HIS HIS MET ALA ASN CYS GLU ARG          
SEQRES   2 B  159  THR PHE ILE ALA ILE LYS PRO ASP GLY VAL GLN ARG GLY          
SEQRES   3 B  159  LEU VAL GLY GLU ILE ILE LYS ARG PHE GLU GLN LYS GLY          
SEQRES   4 B  159  PHE ARG LEU VAL GLY LEU LYS PHE MET GLN ALA SER GLU          
SEQRES   5 B  159  ASP LEU LEU LYS GLU HIS TYR VAL ASP LEU LYS ASP ARG          
SEQRES   6 B  159  PRO PHE PHE ALA GLY LEU VAL LYS TYR MET HIS SER GLY          
SEQRES   7 B  159  PRO VAL VAL ALA MET VAL TRP GLU GLY LEU ASN VAL VAL          
SEQRES   8 B  159  LYS THR GLY ARG VAL MET LEU GLY GLU THR ASN PRO ALA          
SEQRES   9 B  159  ASP SER LYS PRO GLY THR ILE ARG GLY ASP PHE CYS ILE          
SEQRES  10 B  159  GLN VAL GLY ARG ASN ILE ILE HIS GLY SER ASP SER VAL          
SEQRES  11 B  159  GLU SER ALA GLU LYS GLU ILE GLY LEU TRP PHE HIS PRO          
SEQRES  12 B  159  GLU GLU LEU VAL ASP TYR THR SER CYS ALA GLN ASN TRP          
SEQRES  13 B  159  ILE TYR GLU                                                  
SEQRES   1 C  159  MET HIS HIS HIS HIS HIS HIS MET ALA ASN CYS GLU ARG          
SEQRES   2 C  159  THR PHE ILE ALA ILE LYS PRO ASP GLY VAL GLN ARG GLY          
SEQRES   3 C  159  LEU VAL GLY GLU ILE ILE LYS ARG PHE GLU GLN LYS GLY          
SEQRES   4 C  159  PHE ARG LEU VAL GLY LEU LYS PHE MET GLN ALA SER GLU          
SEQRES   5 C  159  ASP LEU LEU LYS GLU HIS TYR VAL ASP LEU LYS ASP ARG          
SEQRES   6 C  159  PRO PHE PHE ALA GLY LEU VAL LYS TYR MET HIS SER GLY          
SEQRES   7 C  159  PRO VAL VAL ALA MET VAL TRP GLU GLY LEU ASN VAL VAL          
SEQRES   8 C  159  LYS THR GLY ARG VAL MET LEU GLY GLU THR ASN PRO ALA          
SEQRES   9 C  159  ASP SER LYS PRO GLY THR ILE ARG GLY ASP PHE CYS ILE          
SEQRES  10 C  159  GLN VAL GLY ARG ASN ILE ILE HIS GLY SER ASP SER VAL          
SEQRES  11 C  159  GLU SER ALA GLU LYS GLU ILE GLY LEU TRP PHE HIS PRO          
SEQRES  12 C  159  GLU GLU LEU VAL ASP TYR THR SER CYS ALA GLN ASN TRP          
SEQRES  13 C  159  ILE TYR GLU                                                  
SEQRES   1 D  159  MET HIS HIS HIS HIS HIS HIS MET ALA ASN CYS GLU ARG          
SEQRES   2 D  159  THR PHE ILE ALA ILE LYS PRO ASP GLY VAL GLN ARG GLY          
SEQRES   3 D  159  LEU VAL GLY GLU ILE ILE LYS ARG PHE GLU GLN LYS GLY          
SEQRES   4 D  159  PHE ARG LEU VAL GLY LEU LYS PHE MET GLN ALA SER GLU          
SEQRES   5 D  159  ASP LEU LEU LYS GLU HIS TYR VAL ASP LEU LYS ASP ARG          
SEQRES   6 D  159  PRO PHE PHE ALA GLY LEU VAL LYS TYR MET HIS SER GLY          
SEQRES   7 D  159  PRO VAL VAL ALA MET VAL TRP GLU GLY LEU ASN VAL VAL          
SEQRES   8 D  159  LYS THR GLY ARG VAL MET LEU GLY GLU THR ASN PRO ALA          
SEQRES   9 D  159  ASP SER LYS PRO GLY THR ILE ARG GLY ASP PHE CYS ILE          
SEQRES  10 D  159  GLN VAL GLY ARG ASN ILE ILE HIS GLY SER ASP SER VAL          
SEQRES  11 D  159  GLU SER ALA GLU LYS GLU ILE GLY LEU TRP PHE HIS PRO          
SEQRES  12 D  159  GLU GLU LEU VAL ASP TYR THR SER CYS ALA GLN ASN TRP          
SEQRES  13 D  159  ILE TYR GLU                                                  
SEQRES   1 E  159  MET HIS HIS HIS HIS HIS HIS MET ALA ASN CYS GLU ARG          
SEQRES   2 E  159  THR PHE ILE ALA ILE LYS PRO ASP GLY VAL GLN ARG GLY          
SEQRES   3 E  159  LEU VAL GLY GLU ILE ILE LYS ARG PHE GLU GLN LYS GLY          
SEQRES   4 E  159  PHE ARG LEU VAL GLY LEU LYS PHE MET GLN ALA SER GLU          
SEQRES   5 E  159  ASP LEU LEU LYS GLU HIS TYR VAL ASP LEU LYS ASP ARG          
SEQRES   6 E  159  PRO PHE PHE ALA GLY LEU VAL LYS TYR MET HIS SER GLY          
SEQRES   7 E  159  PRO VAL VAL ALA MET VAL TRP GLU GLY LEU ASN VAL VAL          
SEQRES   8 E  159  LYS THR GLY ARG VAL MET LEU GLY GLU THR ASN PRO ALA          
SEQRES   9 E  159  ASP SER LYS PRO GLY THR ILE ARG GLY ASP PHE CYS ILE          
SEQRES  10 E  159  GLN VAL GLY ARG ASN ILE ILE HIS GLY SER ASP SER VAL          
SEQRES  11 E  159  GLU SER ALA GLU LYS GLU ILE GLY LEU TRP PHE HIS PRO          
SEQRES  12 E  159  GLU GLU LEU VAL ASP TYR THR SER CYS ALA GLN ASN TRP          
SEQRES  13 E  159  ILE TYR GLU                                                  
SEQRES   1 F  159  MET HIS HIS HIS HIS HIS HIS MET ALA ASN CYS GLU ARG          
SEQRES   2 F  159  THR PHE ILE ALA ILE LYS PRO ASP GLY VAL GLN ARG GLY          
SEQRES   3 F  159  LEU VAL GLY GLU ILE ILE LYS ARG PHE GLU GLN LYS GLY          
SEQRES   4 F  159  PHE ARG LEU VAL GLY LEU LYS PHE MET GLN ALA SER GLU          
SEQRES   5 F  159  ASP LEU LEU LYS GLU HIS TYR VAL ASP LEU LYS ASP ARG          
SEQRES   6 F  159  PRO PHE PHE ALA GLY LEU VAL LYS TYR MET HIS SER GLY          
SEQRES   7 F  159  PRO VAL VAL ALA MET VAL TRP GLU GLY LEU ASN VAL VAL          
SEQRES   8 F  159  LYS THR GLY ARG VAL MET LEU GLY GLU THR ASN PRO ALA          
SEQRES   9 F  159  ASP SER LYS PRO GLY THR ILE ARG GLY ASP PHE CYS ILE          
SEQRES  10 F  159  GLN VAL GLY ARG ASN ILE ILE HIS GLY SER ASP SER VAL          
SEQRES  11 F  159  GLU SER ALA GLU LYS GLU ILE GLY LEU TRP PHE HIS PRO          
SEQRES  12 F  159  GLU GLU LEU VAL ASP TYR THR SER CYS ALA GLN ASN TRP          
SEQRES  13 F  159  ILE TYR GLU                                                  
HET    A7Z  A 201      26                                                       
HET    A7Z  B 201      26                                                       
HET    A7Z  C 201      26                                                       
HET    A7Z  D 201      26                                                       
HET    A7Z  E 201      26                                                       
HET    A7Z  F 201      26                                                       
HETNAM     A7Z 4-[4-(3-METHOXYPHENYL)-1-(PROP-2-YN-1-YL)-1H-IMIDAZOL-           
HETNAM   2 A7Z  5-YL]PHENYL SULFUROFLUORIDATE                                   
FORMUL   7  A7Z    6(C19 H15 F N2 O4 S)                                         
FORMUL  13  HOH   *99(H2 O)                                                     
HELIX    1 AA1 LYS A   12  ARG A   18  1                                   7    
HELIX    2 AA2 LEU A   20  GLY A   32  1                                  13    
HELIX    3 AA3 SER A   44  TYR A   52  1                                   9    
HELIX    4 AA4 VAL A   53  LYS A   56  5                                   4    
HELIX    5 AA5 PHE A   60  SER A   70  1                                  11    
HELIX    6 AA6 ASN A   82  GLY A   92  1                                  11    
HELIX    7 AA7 THR A  103  CYS A  109  1                                   7    
HELIX    8 AA8 GLN A  111  ASN A  115  5                                   5    
HELIX    9 AA9 SER A  122  PHE A  134  1                                  13    
HELIX   10 AB1 HIS A  135  LEU A  139  5                                   5    
HELIX   11 AB2 ALA A  146  TYR A  151  1                                   6    
HELIX   12 AB3 LYS B   12  ARG B   18  1                                   7    
HELIX   13 AB4 LEU B   20  GLY B   32  1                                  13    
HELIX   14 AB5 SER B   44  TYR B   52  1                                   9    
HELIX   15 AB6 VAL B   53  LYS B   56  5                                   4    
HELIX   16 AB7 PHE B   60  GLY B   71  1                                  12    
HELIX   17 AB8 ASN B   82  GLY B   92  1                                  11    
HELIX   18 AB9 THR B  103  CYS B  109  1                                   7    
HELIX   19 AC1 GLN B  111  ASN B  115  5                                   5    
HELIX   20 AC2 SER B  122  PHE B  134  1                                  13    
HELIX   21 AC3 HIS B  135  LEU B  139  5                                   5    
HELIX   22 AC4 ALA B  146  TYR B  151  1                                   6    
HELIX   23 AC5 LYS C   12  ARG C   18  1                                   7    
HELIX   24 AC6 LEU C   20  GLY C   32  1                                  13    
HELIX   25 AC7 SER C   44  TYR C   52  1                                   9    
HELIX   26 AC8 VAL C   53  LYS C   56  5                                   4    
HELIX   27 AC9 PHE C   60  SER C   70  1                                  11    
HELIX   28 AD1 ASN C   82  GLY C   92  1                                  11    
HELIX   29 AD2 THR C  103  CYS C  109  1                                   7    
HELIX   30 AD3 GLN C  111  ASN C  115  5                                   5    
HELIX   31 AD4 SER C  122  PHE C  134  1                                  13    
HELIX   32 AD5 HIS C  135  LEU C  139  5                                   5    
HELIX   33 AD6 ALA C  146  TYR C  151  1                                   6    
HELIX   34 AD7 LYS D   12  ARG D   18  1                                   7    
HELIX   35 AD8 LEU D   20  GLY D   32  1                                  13    
HELIX   36 AD9 SER D   44  TYR D   52  1                                   9    
HELIX   37 AE1 VAL D   53  LYS D   56  5                                   4    
HELIX   38 AE2 PHE D   60  GLY D   71  1                                  12    
HELIX   39 AE3 ASN D   82  GLY D   92  1                                  11    
HELIX   40 AE4 THR D  103  CYS D  109  1                                   7    
HELIX   41 AE5 GLN D  111  ASN D  115  5                                   5    
HELIX   42 AE6 SER D  122  PHE D  134  1                                  13    
HELIX   43 AE7 HIS D  135  LEU D  139  5                                   5    
HELIX   44 AE8 ALA D  146  TYR D  151  1                                   6    
HELIX   45 AE9 LYS E   12  ARG E   18  1                                   7    
HELIX   46 AF1 LEU E   20  GLY E   32  1                                  13    
HELIX   47 AF2 SER E   44  TYR E   52  1                                   9    
HELIX   48 AF3 VAL E   53  LYS E   56  5                                   4    
HELIX   49 AF4 PHE E   60  GLY E   71  1                                  12    
HELIX   50 AF5 ASN E   82  GLY E   92  1                                  11    
HELIX   51 AF6 THR E  103  CYS E  109  1                                   7    
HELIX   52 AF7 GLN E  111  ASN E  115  5                                   5    
HELIX   53 AF8 SER E  122  PHE E  134  1                                  13    
HELIX   54 AF9 HIS E  135  LEU E  139  5                                   5    
HELIX   55 AG1 ALA E  146  TYR E  151  1                                   6    
HELIX   56 AG2 LYS F   12  ARG F   18  1                                   7    
HELIX   57 AG3 LEU F   20  GLY F   32  1                                  13    
HELIX   58 AG4 SER F   44  TYR F   52  1                                   9    
HELIX   59 AG5 VAL F   53  LYS F   56  5                                   4    
HELIX   60 AG6 PHE F   60  GLY F   71  1                                  12    
HELIX   61 AG7 ASN F   82  GLY F   92  1                                  11    
HELIX   62 AG8 THR F  103  CYS F  109  1                                   7    
HELIX   63 AG9 GLN F  111  ASN F  115  5                                   5    
HELIX   64 AH1 SER F  122  PHE F  134  1                                  13    
HELIX   65 AH2 HIS F  135  LEU F  139  5                                   5    
HELIX   66 AH3 ALA F  146  TYR F  151  1                                   6    
SHEET    1 AA1 4 ARG A  34  MET A  41  0                                        
SHEET    2 AA1 4 VAL A  73  GLU A  79 -1  O  VAL A  77   N  VAL A  36           
SHEET    3 AA1 4 ARG A   6  ILE A  11 -1  N  ILE A  11   O  VAL A  74           
SHEET    4 AA1 4 ILE A 117  GLY A 119 -1  O  HIS A 118   N  ALA A  10           
SHEET    1 AA2 4 ARG B  34  MET B  41  0                                        
SHEET    2 AA2 4 VAL B  73  GLU B  79 -1  O  VAL B  77   N  VAL B  36           
SHEET    3 AA2 4 ARG B   6  ILE B  11 -1  N  ILE B   9   O  MET B  76           
SHEET    4 AA2 4 ILE B 117  GLY B 119 -1  O  HIS B 118   N  ALA B  10           
SHEET    1 AA3 4 ARG C  34  MET C  41  0                                        
SHEET    2 AA3 4 VAL C  73  GLU C  79 -1  O  VAL C  77   N  VAL C  36           
SHEET    3 AA3 4 ARG C   6  ILE C  11 -1  N  ILE C  11   O  VAL C  74           
SHEET    4 AA3 4 ILE C 117  GLY C 119 -1  O  HIS C 118   N  ALA C  10           
SHEET    1 AA4 4 ARG D  34  MET D  41  0                                        
SHEET    2 AA4 4 VAL D  73  GLU D  79 -1  O  VAL D  77   N  VAL D  36           
SHEET    3 AA4 4 ARG D   6  ILE D  11 -1  N  ILE D   9   O  MET D  76           
SHEET    4 AA4 4 ILE D 117  GLY D 119 -1  O  HIS D 118   N  ALA D  10           
SHEET    1 AA5 4 ARG E  34  MET E  41  0                                        
SHEET    2 AA5 4 VAL E  73  GLU E  79 -1  O  VAL E  77   N  VAL E  36           
SHEET    3 AA5 4 ARG E   6  ILE E  11 -1  N  ILE E  11   O  VAL E  74           
SHEET    4 AA5 4 ILE E 117  GLY E 119 -1  O  HIS E 118   N  ALA E  10           
SHEET    1 AA6 4 ARG F  34  MET F  41  0                                        
SHEET    2 AA6 4 VAL F  73  GLU F  79 -1  O  VAL F  77   N  VAL F  36           
SHEET    3 AA6 4 ARG F   6  ILE F  11 -1  N  ILE F  11   O  VAL F  74           
SHEET    4 AA6 4 ILE F 117  GLY F 119 -1  O  HIS F 118   N  ALA F  10           
LINK         NZ  LYS A  12                 S   A7Z A 201     1555   1555  1.60  
LINK         NZ  LYS B  12                 S   A7Z B 201     1555   1555  1.60  
LINK         NZ  LYS C  12                 S   A7Z C 201     1555   1555  1.60  
LINK         NZ  LYS D  12                 S   A7Z D 201     1555   1555  1.60  
LINK         NZ  LYS E  12                 S   A7Z E 201     1555   1555  1.60  
LINK         NZ  LYS F  12                 S   A7Z F 201     1555   1555  1.60  
SITE     1 AC1 10 LYS A  12  TYR A  52  PHE A  60  GLY A  63                    
SITE     2 AC1 10 LEU A  64  VAL A 112  GLY A 113  ASN A 115                    
SITE     3 AC1 10 HIS A 118  GLU B 152                                          
SITE     1 AC2 20 ALA B  10  ILE B  11  PRO B  13  ASP B  14                    
SITE     2 AC2 20 GLY B  15  VAL B  16  TYR B  52  ARG B  58                    
SITE     3 AC2 20 PHE B  60  GLY B  63  LEU B  64  TYR B  67                    
SITE     4 AC2 20 MET B  68  VAL B 112  GLY B 113  ASN B 115                    
SITE     5 AC2 20 ILE B 116  ILE B 117  HIS B 118  GLU D 124                    
SITE     1 AC3 20 ALA C  10  ILE C  11  PRO C  13  ASP C  14                    
SITE     2 AC3 20 GLY C  15  VAL C  16  TYR C  52  PHE C  60                    
SITE     3 AC3 20 GLY C  63  LEU C  64  TYR C  67  MET C  68                    
SITE     4 AC3 20 THR C  94  VAL C 112  GLY C 113  ASN C 115                    
SITE     5 AC3 20 ILE C 116  ILE C 117  HIS C 118  ASP E  57                    
SITE     1 AC4 18 ALA D  10  ILE D  11  PRO D  13  ASP D  14                    
SITE     2 AC4 18 GLY D  15  VAL D  16  TYR D  52  LEU D  55                    
SITE     3 AC4 18 PHE D  60  GLY D  63  LEU D  64  TYR D  67                    
SITE     4 AC4 18 THR D  94  VAL D 112  ASN D 115  ILE D 116                    
SITE     5 AC4 18 ILE D 117  HIS D 118                                          
SITE     1 AC5 18 ALA E  10  ILE E  11  PRO E  13  ASP E  14                    
SITE     2 AC5 18 GLY E  15  VAL E  16  TYR E  52  PHE E  60                    
SITE     3 AC5 18 GLY E  63  LEU E  64  TYR E  67  THR E  94                    
SITE     4 AC5 18 VAL E 112  GLY E 113  ASN E 115  ILE E 116                    
SITE     5 AC5 18 ILE E 117  HIS E 118                                          
SITE     1 AC6 21 ASP A  57  GLU D 152  ALA F  10  ILE F  11                    
SITE     2 AC6 21 PRO F  13  ASP F  14  GLY F  15  VAL F  16                    
SITE     3 AC6 21 TYR F  52  ARG F  58  PHE F  60  GLY F  63                    
SITE     4 AC6 21 LEU F  64  TYR F  67  MET F  68  VAL F 112                    
SITE     5 AC6 21 GLY F 113  ASN F 115  ILE F 116  ILE F 117                    
SITE     6 AC6 21 HIS F 118                                                     
CRYST1   60.462   68.058   69.682 113.65  98.20 112.46 P 1           6          
ORIGX1      1.000000  0.000000  0.000000        0.00000                         
ORIGX2      0.000000  1.000000  0.000000        0.00000                         
ORIGX3      0.000000  0.000000  1.000000        0.00000                         
SCALE1      0.016539  0.006837  0.006674        0.00000                         
SCALE2      0.000000  0.015899  0.009132        0.00000                         
SCALE3      0.000000  0.000000  0.016720        0.00000                         
ATOM      1  N   ASN A   3     -12.775  99.295  44.259  1.00 68.02           N  
ATOM      2  CA  ASN A   3     -14.199  99.437  44.696  1.00 70.44           C  
ATOM      3  C   ASN A   3     -14.845 100.740  44.185  1.00 70.37           C  
ATOM      4  O   ASN A   3     -16.016 100.748  43.786  1.00 70.01           O  
ATOM      5  CB  ASN A   3     -14.292  99.347  46.224  1.00 70.90           C  
ATOM      6  CG  ASN A   3     -15.615  98.771  46.695  1.00 68.83           C  
ATOM      7  OD1 ASN A   3     -16.656  99.415  46.589  1.00 68.60           O  
ATOM      8  ND2 ASN A   3     -15.578  97.553  47.223  1.00 67.72           N  
ATOM      9  N   CYS A   4     -14.074 101.829  44.201  1.00 68.70           N  
ATOM     10  CA  CYS A   4     -14.427 103.063  43.482  1.00 65.57           C  
ATOM     11  C   CYS A   4     -13.773 103.120  42.085  1.00 61.49           C  
ATOM     12  O   CYS A   4     -13.595 104.200  41.529  1.00 60.97           O  
ATOM     13  CB  CYS A   4     -14.042 104.294  44.317  1.00 65.95           C  
ATOM     14  SG  CYS A   4     -15.040 104.499  45.809  1.00 66.09           S  
ATOM     15  N   GLU A   5     -13.454 101.955  41.514  1.00 59.98           N  
ATOM     16  CA  GLU A   5     -12.802 101.844  40.200  1.00 59.76           C  
ATOM     17  C   GLU A   5     -13.816 102.157  39.125  1.00 58.67           C  
ATOM     18  O   GLU A   5     -15.000 101.884  39.298  1.00 58.69           O  
ATOM     19  CB  GLU A   5     -12.262 100.417  40.002  1.00 60.37           C  
ATOM     20  CG  GLU A   5     -11.580 100.120  38.670  1.00 59.75           C  
ATOM     21  CD  GLU A   5     -11.110  98.677  38.577  1.00 59.93           C  
ATOM     22  OE1 GLU A   5     -11.332  98.043  37.522  1.00 58.41           O  
ATOM     23  OE2 GLU A   5     -10.534  98.167  39.565  1.00 57.71           O1-
ATOM     24  N   ARG A   6     -13.349 102.725  38.020  1.00 58.46           N  
ATOM     25  CA  ARG A   6     -14.231 103.138  36.935  1.00 59.36           C  
ATOM     26  C   ARG A   6     -13.771 102.583  35.590  1.00 57.96           C  
ATOM     27  O   ARG A   6     -12.578 102.374  35.368  1.00 58.85           O  
ATOM     28  CB  ARG A   6     -14.303 104.658  36.874  1.00 62.51           C  
ATOM     29  CG  ARG A   6     -14.901 105.297  38.121  1.00 67.39           C  
ATOM     30  CD  ARG A   6     -14.829 106.814  38.065  1.00 72.82           C  
ATOM     31  NE  ARG A   6     -13.444 107.256  37.891  1.00 79.57           N  
ATOM     32  CZ  ARG A   6     -13.058 108.490  37.565  1.00 82.68           C  
ATOM     33  NH1 ARG A   6     -13.940 109.473  37.380  1.00 85.73           N1+
ATOM     34  NH2 ARG A   6     -11.761 108.743  37.428  1.00 83.62           N  
ATOM     35  N   THR A   7     -14.737 102.338  34.707  1.00 55.30           N  
ATOM     36  CA  THR A   7     -14.471 101.924  33.332  1.00 52.84           C  
ATOM     37  C   THR A   7     -15.275 102.795  32.379  1.00 51.17           C  
ATOM     38  O   THR A   7     -16.299 103.361  32.757  1.00 51.94           O  
ATOM     39  CB  THR A   7     -14.805 100.435  33.095  1.00 52.54           C  
ATOM     40  OG1 THR A   7     -14.272 100.026  31.830  1.00 50.25           O  
ATOM     41  CG2 THR A   7     -16.321 100.168  33.123  1.00 52.71           C  
ATOM     42  N   PHE A   8     -14.792 102.899  31.148  1.00 50.00           N  
ATOM     43  CA  PHE A   8     -15.488 103.617  30.095  1.00 50.22           C  
ATOM     44  C   PHE A   8     -16.123 102.596  29.148  1.00 51.29           C  
ATOM     45  O   PHE A   8     -15.421 101.759  28.557  1.00 50.96           O  
ATOM     46  CB  PHE A   8     -14.525 104.540  29.340  1.00 49.99           C  
ATOM     47  CG  PHE A   8     -15.101 105.110  28.074  1.00 49.24           C  
ATOM     48  CD1 PHE A   8     -15.873 106.269  28.108  1.00 49.04           C  
ATOM     49  CD2 PHE A   8     -14.891 104.476  26.849  1.00 47.90           C  
ATOM     50  CE1 PHE A   8     -16.417 106.792  26.948  1.00 47.83           C  
ATOM     51  CE2 PHE A   8     -15.434 104.993  25.688  1.00 48.37           C  
ATOM     52  CZ  PHE A   8     -16.194 106.157  25.737  1.00 48.13           C  
ATOM     53  N   ILE A   9     -17.448 102.682  29.012  1.00 50.81           N  
ATOM     54  CA  ILE A   9     -18.216 101.851  28.090  1.00 48.97           C  
ATOM     55  C   ILE A   9     -18.832 102.764  27.034  1.00 48.31           C  
ATOM     56  O   ILE A   9     -19.365 103.825  27.364  1.00 48.31           O  
ATOM     57  CB  ILE A   9     -19.337 101.073  28.821  1.00 48.76           C  
ATOM     58  CG1 ILE A   9     -18.772 100.242  29.985  1.00 48.48           C  
ATOM     59  CG2 ILE A   9     -20.105 100.182  27.848  1.00 49.70           C  
ATOM     60  CD1 ILE A   9     -17.743  99.193  29.593  1.00 48.11           C  
ATOM     61  N   ALA A  10     -18.760 102.343  25.772  1.00 49.43           N  
ATOM     62  CA  ALA A  10     -19.300 103.119  24.646  1.00 51.06           C  
ATOM     63  C   ALA A  10     -20.121 102.232  23.716  1.00 50.45           C  
ATOM     64  O   ALA A  10     -19.578 101.304  23.111  1.00 49.74           O  
ATOM     65  CB  ALA A  10     -18.167 103.779  23.865  1.00 51.25           C  
ATOM     66  N   ILE A  11     -21.416 102.527  23.590  1.00 50.04           N  
ATOM     67  CA  ILE A  11     -22.278 101.825  22.629  1.00 49.00           C  
ATOM     68  C   ILE A  11     -22.012 102.423  21.253  1.00 48.71           C  
ATOM     69  O   ILE A  11     -22.301 103.594  21.013  1.00 48.41           O  
ATOM     70  CB  ILE A  11     -23.773 101.925  23.000  1.00 48.75           C  
ATOM     71  CG1 ILE A  11     -24.009 101.296  24.382  1.00 49.26           C  
ATOM     72  CG2 ILE A  11     -24.634 101.241  21.940  1.00 49.38           C  
ATOM     73  CD1 ILE A  11     -25.389 101.513  24.967  1.00 49.32           C  
ATOM     74  N   LYS A  12     -21.460 101.602  20.362  1.00 48.81           N  
ATOM     75  CA  LYS A  12     -21.130 101.989  18.994  1.00 49.93           C  
ATOM     76  C   LYS A  12     -22.383 102.361  18.201  1.00 49.68           C  
ATOM     77  O   LYS A  12     -23.495 102.019  18.604  1.00 48.84           O  
ATOM     78  CB  LYS A  12     -20.350 100.854  18.322  1.00 52.30           C  
ATOM     79  CG  LYS A  12     -18.848 100.875  18.561  1.00 53.98           C  
ATOM     80  CD  LYS A  12     -18.369  99.822  19.525  1.00 54.41           C  
ATOM     81  CE  LYS A  12     -17.293  98.905  18.962  1.00 54.26           C  
ATOM     82  NZ  LYS A  12     -15.934  99.249  19.464  1.00 56.00           N  
ATOM     83  N   PRO A  13     -22.217 103.067  17.061  1.00 52.26           N  
ATOM     84  CA  PRO A  13     -23.401 103.478  16.212  1.00 51.77           C  
ATOM     85  C   PRO A  13     -24.412 102.384  15.798  1.00 49.25           C  
ATOM     86  O   PRO A  13     -25.615 102.633  15.811  1.00 47.74           O  
ATOM     87  CB  PRO A  13     -22.733 104.081  14.955  1.00 52.04           C  
ATOM     88  CG  PRO A  13     -21.428 104.595  15.461  1.00 52.05           C  
ATOM     89  CD  PRO A  13     -20.959 103.546  16.434  1.00 52.29           C  
ATOM     90  N   ASP A  14     -23.914 101.217  15.403  1.00 48.78           N  
ATOM     91  CA  ASP A  14     -24.766 100.055  15.134  1.00 49.83           C  
ATOM     92  C   ASP A  14     -25.613  99.645  16.344  1.00 50.06           C  
ATOM     93  O   ASP A  14     -26.767  99.244  16.182  1.00 48.92           O  
ATOM     94  CB  ASP A  14     -23.941  98.850  14.640  1.00 51.62           C  
ATOM     95  CG  ASP A  14     -22.771  98.507  15.553  1.00 50.56           C  
ATOM     96  OD1 ASP A  14     -22.163  99.442  16.114  1.00 48.89           O  
ATOM     97  OD2 ASP A  14     -22.454  97.307  15.696  1.00 50.22           O1-
ATOM     98  N   GLY A  15     -25.033  99.736  17.542  1.00 51.54           N  
ATOM     99  CA  GLY A  15     -25.752  99.455  18.790  1.00 51.92           C  
ATOM    100  C   GLY A  15     -26.913 100.409  19.022  1.00 51.60           C  
ATOM    101  O   GLY A  15     -27.996  99.983  19.427  1.00 53.11           O  
ATOM    102  N   VAL A  16     -26.691 101.693  18.734  1.00 49.33           N  
ATOM    103  CA  VAL A  16     -27.734 102.719  18.843  1.00 47.62           C  
ATOM    104  C   VAL A  16     -28.798 102.511  17.768  1.00 49.02           C  
ATOM    105  O   VAL A  16     -29.991 102.503  18.062  1.00 47.88           O  
ATOM    106  CB  VAL A  16     -27.145 104.141  18.729  1.00 46.17           C  
ATOM    107  CG1 VAL A  16     -28.240 105.201  18.719  1.00 46.34           C  
ATOM    108  CG2 VAL A  16     -26.191 104.411  19.877  1.00 46.05           C  
ATOM    109  N   GLN A  17     -28.349 102.342  16.526  1.00 53.20           N  
ATOM    110  CA  GLN A  17     -29.235 102.101  15.372  1.00 55.90           C  
ATOM    111  C   GLN A  17     -30.141 100.875  15.510  1.00 54.13           C  
ATOM    112  O   GLN A  17     -31.280 100.898  15.045  1.00 54.59           O  
ATOM    113  CB  GLN A  17     -28.408 101.979  14.080  1.00 58.17           C  
ATOM    114  CG  GLN A  17     -27.917 103.319  13.549  1.00 61.06           C  
ATOM    115  CD  GLN A  17     -28.978 104.097  12.783  1.00 64.32           C  
ATOM    116  OE1 GLN A  17     -30.032 103.565  12.424  1.00 67.53           O  
ATOM    117  NE2 GLN A  17     -28.701 105.374  12.532  1.00 65.46           N  
ATOM    118  N   ARG A  18     -29.628  99.816  16.132  1.00 53.60           N  
ATOM    119  CA  ARG A  18     -30.372  98.556  16.276  1.00 54.08           C  
ATOM    120  C   ARG A  18     -31.235  98.471  17.551  1.00 53.46           C  
ATOM    121  O   ARG A  18     -31.986  97.505  17.736  1.00 51.95           O  
ATOM    122  CB  ARG A  18     -29.406  97.372  16.173  1.00 52.59           C  
ATOM    123  CG  ARG A  18     -28.827  97.208  14.770  1.00 51.98           C  
ATOM    124  CD  ARG A  18     -27.796  96.100  14.722  1.00 52.77           C  
ATOM    125  NE  ARG A  18     -28.372  94.834  15.178  1.00 52.72           N  
ATOM    126  CZ  ARG A  18     -27.719  93.869  15.821  1.00 53.22           C  
ATOM    127  NH1 ARG A  18     -26.422  93.967  16.112  1.00 55.21           N1+
ATOM    128  NH2 ARG A  18     -28.376  92.774  16.189  1.00 55.35           N  
ATOM    129  N   GLY A  19     -31.124  99.482  18.416  1.00 52.33           N  
ATOM    130  CA  GLY A  19     -32.033  99.659  19.548  1.00 51.12           C  
ATOM    131  C   GLY A  19     -31.638  98.903  20.801  1.00 48.17           C  
ATOM    132  O   GLY A  19     -32.488  98.320  21.465  1.00 47.24           O  
ATOM    133  N   LEU A  20     -30.353  98.928  21.128  1.00 45.80           N  
ATOM    134  CA  LEU A  20     -29.815  98.135  22.229  1.00 46.28           C  
ATOM    135  C   LEU A  20     -29.333  98.984  23.410  1.00 45.41           C  
ATOM    136  O   LEU A  20     -28.721  98.450  24.338  1.00 46.68           O  
ATOM    137  CB  LEU A  20     -28.663  97.274  21.707  1.00 47.53           C  
ATOM    138  CG  LEU A  20     -28.996  96.342  20.537  1.00 47.45           C  
ATOM    139  CD1 LEU A  20     -27.713  95.826  19.895  1.00 47.80           C  
ATOM    140  CD2 LEU A  20     -29.880  95.195  20.998  1.00 46.42           C  
ATOM    141  N   VAL A  21     -29.632 100.285  23.397  1.00 44.08           N  
ATOM    142  CA  VAL A  21     -29.106 101.210  24.400  1.00 42.63           C  
ATOM    143  C   VAL A  21     -29.647 100.842  25.771  1.00 42.59           C  
ATOM    144  O   VAL A  21     -28.878 100.670  26.728  1.00 40.65           O  
ATOM    145  CB  VAL A  21     -29.441 102.683  24.067  1.00 43.12           C  
ATOM    146  CG1 VAL A  21     -28.989 103.629  25.184  1.00 43.75           C  
ATOM    147  CG2 VAL A  21     -28.787 103.095  22.752  1.00 42.64           C  
ATOM    148  N   GLY A  22     -30.969 100.726  25.851  1.00 43.39           N  
ATOM    149  CA  GLY A  22     -31.644 100.335  27.083  1.00 45.32           C  
ATOM    150  C   GLY A  22     -31.258  98.941  27.538  1.00 44.98           C  
ATOM    151  O   GLY A  22     -30.970  98.716  28.719  1.00 44.76           O  
ATOM    152  N   GLU A  23     -31.233  98.015  26.589  1.00 45.21           N  
ATOM    153  CA  GLU A  23     -30.857  96.632  26.870  1.00 47.08           C  
ATOM    154  C   GLU A  23     -29.453  96.521  27.476  1.00 45.35           C  
ATOM    155  O   GLU A  23     -29.252  95.788  28.442  1.00 48.33           O  
ATOM    156  CB  GLU A  23     -30.942  95.796  25.592  1.00 49.94           C  
ATOM    157  CG  GLU A  23     -31.005  94.300  25.832  1.00 53.77           C  
ATOM    158  CD  GLU A  23     -32.363  93.839  26.334  1.00 56.76           C  
ATOM    159  OE1 GLU A  23     -32.478  93.558  27.549  1.00 59.85           O  
ATOM    160  OE2 GLU A  23     -33.312  93.769  25.516  1.00 56.54           O1-
ATOM    161  N   ILE A  24     -28.501  97.257  26.909  1.00 42.31           N  
ATOM    162  CA  ILE A  24     -27.121  97.267  27.391  1.00 40.97           C  
ATOM    163  C   ILE A  24     -27.009  97.916  28.772  1.00 41.33           C  
ATOM    164  O   ILE A  24     -26.386  97.348  29.671  1.00 39.99           O  
ATOM    165  CB  ILE A  24     -26.173  97.954  26.368  1.00 40.55           C  
ATOM    166  CG1 ILE A  24     -25.947  97.017  25.177  1.00 39.87           C  
ATOM    167  CG2 ILE A  24     -24.827  98.334  26.991  1.00 40.75           C  
ATOM    168  CD1 ILE A  24     -25.462  97.699  23.917  1.00 40.55           C  
ATOM    169  N   ILE A  25     -27.583  99.108  28.922  1.00 42.40           N  
ATOM    170  CA  ILE A  25     -27.575  99.828  30.207  1.00 44.33           C  
ATOM    171  C   ILE A  25     -28.197  98.986  31.326  1.00 47.34           C  
ATOM    172  O   ILE A  25     -27.688  98.965  32.448  1.00 48.46           O  
ATOM    173  CB  ILE A  25     -28.296 101.196  30.099  1.00 42.79           C  
ATOM    174  CG1 ILE A  25     -27.424 102.175  29.312  1.00 43.17           C  
ATOM    175  CG2 ILE A  25     -28.594 101.788  31.474  1.00 41.61           C  
ATOM    176  CD1 ILE A  25     -28.149 103.398  28.790  1.00 42.26           C  
ATOM    177  N   LYS A  26     -29.295  98.305  31.002  1.00 49.99           N  
ATOM    178  CA  LYS A  26     -30.002  97.418  31.934  1.00 51.65           C  
ATOM    179  C   LYS A  26     -29.087  96.364  32.551  1.00 50.12           C  
ATOM    180  O   LYS A  26     -29.172  96.104  33.747  1.00 51.03           O  
ATOM    181  CB  LYS A  26     -31.173  96.743  31.207  1.00 54.20           C  
ATOM    182  CG  LYS A  26     -32.014  95.775  32.024  1.00 54.64           C  
ATOM    183  CD  LYS A  26     -33.381  95.618  31.372  1.00 55.47           C  
ATOM    184  CE  LYS A  26     -34.208  94.505  31.992  1.00 56.87           C  
ATOM    185  NZ  LYS A  26     -33.834  93.178  31.445  1.00 57.98           N1+
ATOM    186  N   ARG A  27     -28.189  95.800  31.743  1.00 48.68           N  
ATOM    187  CA  ARG A  27     -27.250  94.766  32.216  1.00 47.67           C  
ATOM    188  C   ARG A  27     -26.254  95.260  33.256  1.00 46.09           C  
ATOM    189  O   ARG A  27     -25.972  94.556  34.211  1.00 44.61           O  
ATOM    190  CB  ARG A  27     -26.493  94.142  31.045  1.00 46.99           C  
ATOM    191  CG  ARG A  27     -27.420  93.445  30.071  1.00 47.14           C  
ATOM    192  CD  ARG A  27     -26.732  92.358  29.289  1.00 46.36           C  
ATOM    193  NE  ARG A  27     -27.689  91.644  28.454  1.00 45.28           N  
ATOM    194  CZ  ARG A  27     -27.390  90.612  27.667  1.00 44.54           C  
ATOM    195  NH1 ARG A  27     -26.144  90.142  27.597  1.00 44.82           N1+
ATOM    196  NH2 ARG A  27     -28.349  90.049  26.943  1.00 43.68           N  
ATOM    197  N   PHE A  28     -25.730  96.465  33.057  1.00 49.11           N  
ATOM    198  CA  PHE A  28     -24.858  97.110  34.046  1.00 50.44           C  
ATOM    199  C   PHE A  28     -25.611  97.495  35.321  1.00 50.76           C  
ATOM    200  O   PHE A  28     -25.068  97.365  36.418  1.00 51.61           O  
ATOM    201  CB  PHE A  28     -24.152  98.335  33.448  1.00 51.46           C  
ATOM    202  CG  PHE A  28     -23.043  97.982  32.499  1.00 52.13           C  
ATOM    203  CD1 PHE A  28     -23.295  97.827  31.140  1.00 52.46           C  
ATOM    204  CD2 PHE A  28     -21.747  97.787  32.967  1.00 52.85           C  
ATOM    205  CE1 PHE A  28     -22.274  97.492  30.262  1.00 53.62           C  
ATOM    206  CE2 PHE A  28     -20.720  97.458  32.094  1.00 53.23           C  
ATOM    207  CZ  PHE A  28     -20.984  97.310  30.740  1.00 53.23           C  
ATOM    208  N   GLU A  29     -26.854  97.957  35.175  1.00 49.83           N  
ATOM    209  CA  GLU A  29     -27.685  98.316  36.332  1.00 49.01           C  
ATOM    210  C   GLU A  29     -28.003  97.098  37.189  1.00 49.46           C  
ATOM    211  O   GLU A  29     -27.719  97.093  38.381  1.00 47.94           O  
ATOM    212  CB  GLU A  29     -28.984  99.005  35.896  1.00 48.11           C  
ATOM    213  CG  GLU A  29     -28.791 100.445  35.457  1.00 47.61           C  
ATOM    214  CD  GLU A  29     -30.091 101.129  35.110  1.00 46.48           C  
ATOM    215  OE1 GLU A  29     -30.759 100.669  34.162  1.00 45.58           O  
ATOM    216  OE2 GLU A  29     -30.440 102.131  35.777  1.00 47.66           O1-
ATOM    217  N   GLN A  30     -28.567  96.062  36.570  1.00 51.11           N  
ATOM    218  CA  GLN A  30     -28.965  94.853  37.305  1.00 52.81           C  
ATOM    219  C   GLN A  30     -27.780  94.080  37.884  1.00 51.66           C  
ATOM    220  O   GLN A  30     -27.940  93.356  38.859  1.00 51.85           O  
ATOM    221  CB  GLN A  30     -29.845  93.935  36.445  1.00 55.10           C  
ATOM    222  CG  GLN A  30     -29.124  93.198  35.327  1.00 57.58           C  
ATOM    223  CD  GLN A  30     -30.064  92.490  34.374  1.00 60.60           C  
ATOM    224  OE1 GLN A  30     -31.252  92.773  34.348  1.00 62.53           O  
ATOM    225  NE2 GLN A  30     -29.528  91.567  33.577  1.00 61.86           N  
ATOM    226  N   LYS A  31     -26.608  94.224  37.269  1.00 50.54           N  
ATOM    227  CA  LYS A  31     -25.367  93.652  37.795  1.00 49.17           C  
ATOM    228  C   LYS A  31     -24.984  94.244  39.153  1.00 49.67           C  
ATOM    229  O   LYS A  31     -24.466  93.522  40.012  1.00 49.31           O  
ATOM    230  CB  LYS A  31     -24.235  93.855  36.782  1.00 48.69           C  
ATOM    231  CG  LYS A  31     -22.853  93.402  37.221  1.00 48.93           C  
ATOM    232  CD  LYS A  31     -22.794  91.913  37.472  1.00 47.42           C  
ATOM    233  CE  LYS A  31     -21.357  91.477  37.652  1.00 46.80           C  
ATOM    234  NZ  LYS A  31     -21.261  90.001  37.753  1.00 47.20           N1+
ATOM    235  N   GLY A  32     -25.243  95.542  39.336  1.00 49.21           N  
ATOM    236  CA  GLY A  32     -24.931  96.253  40.582  1.00 48.85           C  
ATOM    237  C   GLY A  32     -24.045  97.483  40.434  1.00 48.44           C  
ATOM    238  O   GLY A  32     -23.885  98.237  41.394  1.00 47.78           O  
ATOM    239  N   PHE A  33     -23.469  97.692  39.248  1.00 47.78           N  
ATOM    240  CA  PHE A  33     -22.575  98.829  39.005  1.00 47.70           C  
ATOM    241  C   PHE A  33     -23.343 100.144  38.972  1.00 48.43           C  
ATOM    242  O   PHE A  33     -24.530 100.168  38.650  1.00 48.41           O  
ATOM    243  CB  PHE A  33     -21.803  98.654  37.695  1.00 47.23           C  
ATOM    244  CG  PHE A  33     -20.862  97.482  37.696  1.00 47.40           C  
ATOM    245  CD1 PHE A  33     -19.862  97.384  38.654  1.00 48.57           C  
ATOM    246  CD2 PHE A  33     -20.958  96.479  36.733  1.00 47.82           C  
ATOM    247  CE1 PHE A  33     -18.980  96.308  38.663  1.00 47.93           C  
ATOM    248  CE2 PHE A  33     -20.080  95.400  36.740  1.00 48.34           C  
ATOM    249  CZ  PHE A  33     -19.091  95.315  37.706  1.00 47.50           C  
ATOM    250  N   ARG A  34     -22.650 101.226  39.321  1.00 49.35           N  
ATOM    251  CA  ARG A  34     -23.247 102.550  39.472  1.00 52.17           C  
ATOM    252  C   ARG A  34     -22.972 103.387  38.230  1.00 51.65           C  
ATOM    253  O   ARG A  34     -21.824 103.508  37.820  1.00 51.92           O  
ATOM    254  CB  ARG A  34     -22.661 103.243  40.705  1.00 55.23           C  
ATOM    255  CG  ARG A  34     -23.286 104.593  41.022  1.00 58.88           C  
ATOM    256  CD  ARG A  34     -22.770 105.174  42.329  1.00 62.76           C  
ATOM    257  NE  ARG A  34     -21.423 105.757  42.235  1.00 66.92           N  
ATOM    258  CZ  ARG A  34     -21.106 106.918  41.637  1.00 72.87           C  
ATOM    259  NH1 ARG A  34     -19.842 107.340  41.634  1.00 74.64           N1+
ATOM    260  NH2 ARG A  34     -22.022 107.668  41.022  1.00 73.31           N  
ATOM    261  N   LEU A  35     -24.019 103.967  37.639  1.00 50.58           N  
ATOM    262  CA  LEU A  35     -23.854 104.862  36.491  1.00 50.57           C  
ATOM    263  C   LEU A  35     -23.286 106.193  36.967  1.00 51.00           C  
ATOM    264  O   LEU A  35     -23.877 106.856  37.814  1.00 49.61           O  
ATOM    265  CB  LEU A  35     -25.180 105.093  35.763  1.00 49.91           C  
ATOM    266  CG  LEU A  35     -25.137 106.003  34.530  1.00 50.20           C  
ATOM    267  CD1 LEU A  35     -24.277 105.418  33.420  1.00 50.59           C  
ATOM    268  CD2 LEU A  35     -26.546 106.276  34.026  1.00 50.06           C  
ATOM    269  N   VAL A  36     -22.127 106.555  36.425  1.00 53.24           N  
ATOM    270  CA  VAL A  36     -21.397 107.758  36.824  1.00 52.59           C  
ATOM    271  C   VAL A  36     -21.523 108.854  35.770  1.00 50.31           C  
ATOM    272  O   VAL A  36     -21.695 110.023  36.108  1.00 50.03           O  
ATOM    273  CB  VAL A  36     -19.902 107.440  37.066  1.00 55.06           C  
ATOM    274  CG1 VAL A  36     -19.119 108.681  37.435  1.00 56.55           C  
ATOM    275  CG2 VAL A  36     -19.754 106.374  38.138  1.00 56.87           C  
ATOM    276  N   GLY A  37     -21.393 108.475  34.503  1.00 49.38           N  
ATOM    277  CA  GLY A  37     -21.511 109.406  33.389  1.00 51.01           C  
ATOM    278  C   GLY A  37     -22.250 108.782  32.222  1.00 51.24           C  
ATOM    279  O   GLY A  37     -22.201 107.567  32.024  1.00 52.09           O  
ATOM    280  N   LEU A  38     -22.934 109.625  31.455  1.00 51.08           N  
ATOM    281  CA  LEU A  38     -23.733 109.180  30.320  1.00 53.15           C  
ATOM    282  C   LEU A  38     -23.994 110.355  29.399  1.00 51.52           C  
ATOM    283  O   LEU A  38     -24.459 111.396  29.849  1.00 53.55           O  
ATOM    284  CB  LEU A  38     -25.060 108.589  30.805  1.00 54.72           C  
ATOM    285  CG  LEU A  38     -26.127 108.192  29.778  1.00 56.21           C  
ATOM    286  CD1 LEU A  38     -25.627 107.046  28.922  1.00 57.01           C  
ATOM    287  CD2 LEU A  38     -27.413 107.791  30.478  1.00 58.48           C  
ATOM    288  N   LYS A  39     -23.698 110.188  28.116  1.00 50.48           N  
ATOM    289  CA  LYS A  39     -23.963 111.231  27.129  1.00 52.62           C  
ATOM    290  C   LYS A  39     -24.039 110.659  25.720  1.00 52.49           C  
ATOM    291  O   LYS A  39     -23.491 109.596  25.437  1.00 55.48           O  
ATOM    292  CB  LYS A  39     -22.904 112.334  27.201  1.00 54.07           C  
ATOM    293  CG  LYS A  39     -21.480 111.809  27.147  1.00 56.64           C  
ATOM    294  CD  LYS A  39     -20.506 112.777  26.502  1.00 56.95           C  
ATOM    295  CE  LYS A  39     -20.165 113.940  27.412  1.00 57.25           C  
ATOM    296  NZ  LYS A  39     -19.071 114.744  26.805  1.00 56.22           N1+
ATOM    297  N   PHE A  40     -24.716 111.397  24.853  1.00 53.00           N  
ATOM    298  CA  PHE A  40     -25.044 110.966  23.506  1.00 54.13           C  
ATOM    299  C   PHE A  40     -24.454 111.999  22.561  1.00 56.14           C  
ATOM    300  O   PHE A  40     -24.827 113.169  22.600  1.00 56.04           O  
ATOM    301  CB  PHE A  40     -26.562 110.902  23.380  1.00 54.85           C  
ATOM    302  CG  PHE A  40     -27.065 110.285  22.108  1.00 54.43           C  
ATOM    303  CD1 PHE A  40     -26.720 108.984  21.768  1.00 54.20           C  
ATOM    304  CD2 PHE A  40     -27.943 110.981  21.285  1.00 55.08           C  
ATOM    305  CE1 PHE A  40     -27.202 108.401  20.608  1.00 54.37           C  
ATOM    306  CE2 PHE A  40     -28.432 110.404  20.122  1.00 56.05           C  
ATOM    307  CZ  PHE A  40     -28.060 109.111  19.781  1.00 55.36           C  
ATOM    308  N   MET A  41     -23.521 111.561  21.723  1.00 60.17           N  
ATOM    309  CA  MET A  41     -22.704 112.469  20.928  1.00 61.07           C  
ATOM    310  C   MET A  41     -22.231 111.809  19.651  1.00 61.18           C  
ATOM    311  O   MET A  41     -21.982 110.605  19.626  1.00 60.39           O  
ATOM    312  CB  MET A  41     -21.486 112.914  21.745  1.00 62.69           C  
ATOM    313  CG  MET A  41     -20.637 111.774  22.300  1.00 63.76           C  
ATOM    314  SD  MET A  41     -19.239 112.341  23.281  1.00 67.98           S  
ATOM    315  CE  MET A  41     -18.194 113.044  22.005  1.00 69.08           C  
ATOM    316  N   GLN A  42     -22.098 112.606  18.596  1.00 63.13           N  
ATOM    317  CA  GLN A  42     -21.375 112.171  17.418  1.00 65.47           C  
ATOM    318  C   GLN A  42     -19.905 112.500  17.643  1.00 63.41           C  
ATOM    319  O   GLN A  42     -19.543 113.662  17.780  1.00 60.36           O  
ATOM    320  CB  GLN A  42     -21.892 112.853  16.160  1.00 68.20           C  
ATOM    321  CG  GLN A  42     -21.209 112.336  14.894  1.00 69.59           C  
ATOM    322  CD  GLN A  42     -22.141 112.205  13.704  1.00 71.75           C  
ATOM    323  OE1 GLN A  42     -23.347 111.981  13.855  1.00 74.21           O  
ATOM    324  NE2 GLN A  42     -21.582 112.330  12.505  1.00 73.94           N  
ATOM    325  N   ALA A  43     -19.071 111.464  17.697  1.00 66.25           N  
ATOM    326  CA  ALA A  43     -17.639 111.613  17.960  1.00 65.00           C  
ATOM    327  C   ALA A  43     -16.912 112.106  16.720  1.00 63.67           C  
ATOM    328  O   ALA A  43     -17.171 111.623  15.613  1.00 62.10           O  
ATOM    329  CB  ALA A  43     -17.045 110.287  18.413  1.00 65.79           C  
ATOM    330  N   SER A  44     -16.005 113.063  16.920  1.00 64.49           N  
ATOM    331  CA  SER A  44     -15.128 113.560  15.855  1.00 66.34           C  
ATOM    332  C   SER A  44     -14.017 112.552  15.575  1.00 69.95           C  
ATOM    333  O   SER A  44     -13.688 111.733  16.433  1.00 70.26           O  
ATOM    334  CB  SER A  44     -14.503 114.893  16.257  1.00 63.07           C  
ATOM    335  OG  SER A  44     -13.666 114.728  17.386  1.00 61.47           O  
ATOM    336  N   GLU A  45     -13.440 112.625  14.378  1.00 74.20           N  
ATOM    337  CA  GLU A  45     -12.358 111.715  13.974  1.00 76.67           C  
ATOM    338  C   GLU A  45     -11.079 111.867  14.801  1.00 74.84           C  
ATOM    339  O   GLU A  45     -10.368 110.887  15.019  1.00 74.45           O  
ATOM    340  CB  GLU A  45     -12.035 111.896  12.495  1.00 80.70           C  
ATOM    341  CG  GLU A  45     -13.128 111.382  11.577  1.00 86.51           C  
ATOM    342  CD  GLU A  45     -13.177 112.139  10.269  1.00 94.91           C  
ATOM    343  OE1 GLU A  45     -13.653 113.298  10.279  1.00 99.23           O  
ATOM    344  OE2 GLU A  45     -12.743 111.577   9.241  1.00 98.10           O1-
ATOM    345  N   ASP A  46     -10.793 113.085  15.257  1.00 76.33           N  
ATOM    346  CA  ASP A  46      -9.643 113.331  16.139  1.00 77.81           C  
ATOM    347  C   ASP A  46      -9.808 112.658  17.503  1.00 72.93           C  
ATOM    348  O   ASP A  46      -8.839 112.138  18.051  1.00 70.71           O  
ATOM    349  CB  ASP A  46      -9.394 114.834  16.320  1.00 83.81           C  
ATOM    350  CG  ASP A  46      -8.858 115.502  15.055  1.00 89.61           C  
ATOM    351  OD1 ASP A  46      -9.011 114.943  13.943  1.00 92.85           O  
ATOM    352  OD2 ASP A  46      -8.284 116.601  15.177  1.00 95.43           O1-
ATOM    353  N   LEU A  47     -11.031 112.668  18.033  1.00 71.33           N  
ATOM    354  CA  LEU A  47     -11.356 111.943  19.265  1.00 68.11           C  
ATOM    355  C   LEU A  47     -11.202 110.432  19.083  1.00 67.11           C  
ATOM    356  O   LEU A  47     -10.597 109.761  19.917  1.00 66.99           O  
ATOM    357  CB  LEU A  47     -12.783 112.265  19.722  1.00 68.05           C  
ATOM    358  CG  LEU A  47     -13.260 111.650  21.046  1.00 69.86           C  
ATOM    359  CD1 LEU A  47     -12.543 112.278  22.226  1.00 70.58           C  
ATOM    360  CD2 LEU A  47     -14.763 111.820  21.204  1.00 72.23           C  
ATOM    361  N   LEU A  48     -11.750 109.907  17.990  1.00 67.70           N  
ATOM    362  CA  LEU A  48     -11.695 108.469  17.700  1.00 69.86           C  
ATOM    363  C   LEU A  48     -10.274 107.966  17.430  1.00 69.73           C  
ATOM    364  O   LEU A  48      -9.910 106.875  17.879  1.00 69.76           O  
ATOM    365  CB  LEU A  48     -12.612 108.117  16.517  1.00 70.95           C  
ATOM    366  CG  LEU A  48     -14.114 108.304  16.764  1.00 71.36           C  
ATOM    367  CD1 LEU A  48     -14.887 108.282  15.455  1.00 72.57           C  
ATOM    368  CD2 LEU A  48     -14.650 107.249  17.719  1.00 71.05           C  
ATOM    369  N   LYS A  49      -9.487 108.761  16.704  1.00 69.60           N  
ATOM    370  CA  LYS A  49      -8.084 108.432  16.416  1.00 67.86           C  
ATOM    371  C   LYS A  49      -7.213 108.389  17.671  1.00 67.34           C  
ATOM    372  O   LYS A  49      -6.329 107.540  17.781  1.00 65.96           O  
ATOM    373  CB  LYS A  49      -7.498 109.402  15.384  1.00 69.30           C  
ATOM    374  CG  LYS A  49      -7.936 109.088  13.963  1.00 71.03           C  
ATOM    375  CD  LYS A  49      -7.507 110.154  12.972  1.00 73.11           C  
ATOM    376  CE  LYS A  49      -7.915 109.755  11.563  1.00 75.83           C  
ATOM    377  NZ  LYS A  49      -7.561 110.790  10.555  1.00 78.32           N1+
ATOM    378  N   GLU A  50      -7.476 109.289  18.616  1.00 70.23           N  
ATOM    379  CA  GLU A  50      -6.784 109.279  19.911  1.00 76.05           C  
ATOM    380  C   GLU A  50      -7.219 108.090  20.765  1.00 75.31           C  
ATOM    381  O   GLU A  50      -6.389 107.451  21.411  1.00 73.20           O  
ATOM    382  CB  GLU A  50      -7.044 110.592  20.666  1.00 81.47           C  
ATOM    383  CG  GLU A  50      -6.282 110.799  21.978  1.00 86.33           C  
ATOM    384  CD  GLU A  50      -4.770 110.692  21.840  1.00 93.52           C  
ATOM    385  OE1 GLU A  50      -4.088 110.347  22.837  1.00102.23           O  
ATOM    386  OE2 GLU A  50      -4.255 110.955  20.735  1.00 95.78           O1-
ATOM    387  N   HIS A  51      -8.526 107.826  20.774  1.00 74.62           N  
ATOM    388  CA  HIS A  51      -9.120 106.720  21.536  1.00 71.72           C  
ATOM    389  C   HIS A  51      -8.596 105.359  21.069  1.00 69.83           C  
ATOM    390  O   HIS A  51      -8.212 104.529  21.896  1.00 67.25           O  
ATOM    391  CB  HIS A  51     -10.656 106.782  21.439  1.00 71.79           C  
ATOM    392  CG  HIS A  51     -11.361 105.604  22.039  1.00 70.49           C  
ATOM    393  ND1 HIS A  51     -11.536 105.445  23.396  1.00 69.21           N  
ATOM    394  CD2 HIS A  51     -11.948 104.535  21.457  1.00 70.02           C  
ATOM    395  CE1 HIS A  51     -12.192 104.322  23.624  1.00 68.59           C  
ATOM    396  NE2 HIS A  51     -12.452 103.750  22.464  1.00 69.40           N  
ATOM    397  N   TYR A  52      -8.562 105.150  19.751  1.00 67.88           N  
ATOM    398  CA  TYR A  52      -8.054 103.903  19.158  1.00 67.97           C  
ATOM    399  C   TYR A  52      -6.592 104.025  18.682  1.00 67.88           C  
ATOM    400  O   TYR A  52      -6.207 103.410  17.684  1.00 67.53           O  
ATOM    401  CB  TYR A  52      -8.964 103.454  17.996  1.00 68.26           C  
ATOM    402  CG  TYR A  52     -10.369 103.040  18.402  1.00 68.61           C  
ATOM    403  CD1 TYR A  52     -10.580 101.990  19.294  1.00 67.95           C  
ATOM    404  CD2 TYR A  52     -11.491 103.680  17.867  1.00 71.05           C  
ATOM    405  CE1 TYR A  52     -11.858 101.601  19.660  1.00 69.44           C  
ATOM    406  CE2 TYR A  52     -12.774 103.299  18.232  1.00 71.81           C  
ATOM    407  CZ  TYR A  52     -12.953 102.258  19.127  1.00 71.05           C  
ATOM    408  OH  TYR A  52     -14.225 101.882  19.493  1.00 70.61           O  
ATOM    409  N   VAL A  53      -5.769 104.780  19.414  1.00 69.20           N  
ATOM    410  CA  VAL A  53      -4.388 105.070  18.984  1.00 69.16           C  
ATOM    411  C   VAL A  53      -3.480 103.830  18.946  1.00 68.62           C  
ATOM    412  O   VAL A  53      -2.570 103.753  18.121  1.00 66.38           O  
ATOM    413  CB  VAL A  53      -3.741 106.199  19.833  1.00 68.63           C  
ATOM    414  CG1 VAL A  53      -3.381 105.729  21.244  1.00 67.87           C  
ATOM    415  CG2 VAL A  53      -2.528 106.783  19.121  1.00 68.32           C  
ATOM    416  N   ASP A  54      -3.729 102.865  19.831  1.00 72.70           N  
ATOM    417  CA  ASP A  54      -2.973 101.602  19.830  1.00 73.19           C  
ATOM    418  C   ASP A  54      -3.202 100.775  18.565  1.00 68.52           C  
ATOM    419  O   ASP A  54      -2.352  99.970  18.202  1.00 65.45           O  
ATOM    420  CB  ASP A  54      -3.305 100.763  21.069  1.00 77.03           C  
ATOM    421  CG  ASP A  54      -2.870 101.435  22.378  1.00 83.21           C  
ATOM    422  OD1 ASP A  54      -3.327 101.006  23.466  1.00 87.62           O  
ATOM    423  OD2 ASP A  54      -2.080 102.404  22.326  1.00 86.66           O1-
ATOM    424  N   LEU A  55      -4.336 100.991  17.897  1.00 66.83           N  
ATOM    425  CA  LEU A  55      -4.663 100.324  16.631  1.00 66.97           C  
ATOM    426  C   LEU A  55      -4.360 101.168  15.386  1.00 68.13           C  
ATOM    427  O   LEU A  55      -4.755 100.795  14.288  1.00 63.13           O  
ATOM    428  CB  LEU A  55      -6.146  99.946  16.626  1.00 65.42           C  
ATOM    429  CG  LEU A  55      -6.669  99.201  17.856  1.00 64.90           C  
ATOM    430  CD1 LEU A  55      -8.177  99.039  17.762  1.00 64.51           C  
ATOM    431  CD2 LEU A  55      -5.992  97.851  17.998  1.00 64.26           C  
ATOM    432  N   LYS A  56      -3.679 102.301  15.562  1.00 73.84           N  
ATOM    433  CA  LYS A  56      -3.346 103.237  14.478  1.00 78.89           C  
ATOM    434  C   LYS A  56      -2.865 102.600  13.159  1.00 79.07           C  
ATOM    435  O   LYS A  56      -3.372 102.933  12.078  1.00 80.40           O  
ATOM    436  CB  LYS A  56      -2.305 104.251  15.000  1.00 82.72           C  
ATOM    437  CG  LYS A  56      -2.059 105.423  14.071  1.00 88.48           C  
ATOM    438  CD  LYS A  56      -0.936 106.405  14.370  1.00 90.30           C  
ATOM    439  CE  LYS A  56      -0.077 106.040  15.634  1.00 90.09           C  
ATOM    440  NZ  LYS A  56       1.246 105.455  15.263  1.00 91.73           N1+
ATOM    441  N   ASP A  57      -1.889 101.703  13.247  1.00 79.44           N  
ATOM    442  CA  ASP A  57      -1.300 101.073  12.059  1.00 80.70           C  
ATOM    443  C   ASP A  57      -1.751  99.630  11.867  1.00 73.04           C  
ATOM    444  O   ASP A  57      -0.939  98.719  11.679  1.00 69.81           O  
ATOM    445  CB  ASP A  57       0.218 101.134  12.153  1.00 87.06           C  
ATOM    446  CG  ASP A  57       0.771 102.556  12.244  1.00 91.83           C  
ATOM    447  OD1 ASP A  57       1.960 102.676  12.577  1.00 85.66           O  
ATOM    448  OD2 ASP A  57       0.045 103.546  12.000  1.00100.81           O1-
ATOM    449  N   ARG A  58      -3.066  99.451  11.894  1.00 72.12           N  
ATOM    450  CA  ARG A  58      -3.716  98.189  11.580  1.00 69.84           C  
ATOM    451  C   ARG A  58      -4.465  98.372  10.265  1.00 68.88           C  
ATOM    452  O   ARG A  58      -4.904  99.485   9.964  1.00 71.77           O  
ATOM    453  CB  ARG A  58      -4.704  97.823  12.680  1.00 70.67           C  
ATOM    454  CG  ARG A  58      -4.098  97.675  14.068  1.00 72.97           C  
ATOM    455  CD  ARG A  58      -3.114  96.516  14.181  1.00 75.41           C  
ATOM    456  NE  ARG A  58      -3.371  95.631  15.321  1.00 77.49           N  
ATOM    457  CZ  ARG A  58      -4.151  94.547  15.325  1.00 78.02           C  
ATOM    458  NH1 ARG A  58      -4.815  94.161  14.242  1.00 75.77           N1+
ATOM    459  NH2 ARG A  58      -4.270  93.830  16.441  1.00 80.78           N  
ATOM    460  N   PRO A  59      -4.634  97.288   9.482  1.00 68.89           N  
ATOM    461  CA  PRO A  59      -5.312  97.402   8.175  1.00 68.73           C  
ATOM    462  C   PRO A  59      -6.765  97.928   8.223  1.00 68.82           C  
ATOM    463  O   PRO A  59      -7.213  98.570   7.274  1.00 68.08           O  
ATOM    464  CB  PRO A  59      -5.262  95.969   7.613  1.00 68.60           C  
ATOM    465  CG  PRO A  59      -4.994  95.087   8.783  1.00 69.79           C  
ATOM    466  CD  PRO A  59      -4.202  95.905   9.757  1.00 69.86           C  
ATOM    467  N   PHE A  60      -7.474  97.655   9.317  1.00 68.42           N  
ATOM    468  CA  PHE A  60      -8.873  98.089   9.490  1.00 65.99           C  
ATOM    469  C   PHE A  60      -9.051  99.511  10.039  1.00 63.42           C  
ATOM    470  O   PHE A  60     -10.166 100.032   9.999  1.00 66.07           O  
ATOM    471  CB  PHE A  60      -9.657  97.094  10.379  1.00 66.48           C  
ATOM    472  CG  PHE A  60      -9.046  96.857  11.745  1.00 65.37           C  
ATOM    473  CD1 PHE A  60      -9.167  97.804  12.764  1.00 63.56           C  
ATOM    474  CD2 PHE A  60      -8.357  95.677  12.013  1.00 64.10           C  
ATOM    475  CE1 PHE A  60      -8.596  97.589  14.012  1.00 62.43           C  
ATOM    476  CE2 PHE A  60      -7.786  95.460  13.257  1.00 63.72           C  
ATOM    477  CZ  PHE A  60      -7.906  96.415  14.260  1.00 62.49           C  
ATOM    478  N   PHE A  61      -7.982 100.115  10.567  1.00 60.76           N  
ATOM    479  CA  PHE A  61      -8.065 101.375  11.345  1.00 59.70           C  
ATOM    480  C   PHE A  61      -8.816 102.522  10.659  1.00 60.30           C  
ATOM    481  O   PHE A  61      -9.557 103.249  11.315  1.00 59.72           O  
ATOM    482  CB  PHE A  61      -6.660 101.849  11.749  1.00 57.61           C  
ATOM    483  CG  PHE A  61      -6.655 103.120  12.562  1.00 55.99           C  
ATOM    484  CD1 PHE A  61      -6.988 103.105  13.908  1.00 54.72           C  
ATOM    485  CD2 PHE A  61      -6.322 104.341  11.974  1.00 57.86           C  
ATOM    486  CE1 PHE A  61      -6.982 104.276  14.656  1.00 54.33           C  
ATOM    487  CE2 PHE A  61      -6.317 105.515  12.718  1.00 56.50           C  
ATOM    488  CZ  PHE A  61      -6.649 105.481  14.063  1.00 54.76           C  
ATOM    489  N   ALA A  62      -8.605 102.689   9.355  1.00 62.64           N  
ATOM    490  CA  ALA A  62      -9.324 103.705   8.573  1.00 62.92           C  
ATOM    491  C   ALA A  62     -10.830 103.459   8.607  1.00 63.44           C  
ATOM    492  O   ALA A  62     -11.612 104.367   8.902  1.00 60.72           O  
ATOM    493  CB  ALA A  62      -8.833 103.712   7.134  1.00 62.28           C  
ATOM    494  N   GLY A  63     -11.214 102.220   8.306  1.00 67.37           N  
ATOM    495  CA  GLY A  63     -12.614 101.802   8.307  1.00 71.09           C  
ATOM    496  C   GLY A  63     -13.281 101.828   9.674  1.00 71.90           C  
ATOM    497  O   GLY A  63     -14.483 102.074   9.769  1.00 73.80           O  
ATOM    498  N   LEU A  64     -12.506 101.534  10.721  1.00 74.27           N  
ATOM    499  CA  LEU A  64     -12.960 101.646  12.117  1.00 74.90           C  
ATOM    500  C   LEU A  64     -13.356 103.080  12.452  1.00 74.35           C  
ATOM    501  O   LEU A  64     -14.450 103.321  12.966  1.00 72.28           O  
ATOM    502  CB  LEU A  64     -11.861 101.174  13.088  1.00 75.83           C  
ATOM    503  CG  LEU A  64     -12.100 101.329  14.599  1.00 76.02           C  
ATOM    504  CD1 LEU A  64     -13.291 100.494  15.055  1.00 77.57           C  
ATOM    505  CD2 LEU A  64     -10.853 100.951  15.382  1.00 75.46           C  
ATOM    506  N   VAL A  65     -12.451 104.011  12.161  1.00 74.65           N  
ATOM    507  CA  VAL A  65     -12.679 105.439  12.412  1.00 76.56           C  
ATOM    508  C   VAL A  65     -13.902 105.974  11.630  1.00 78.65           C  
ATOM    509  O   VAL A  65     -14.625 106.823  12.153  1.00 77.27           O  
ATOM    510  CB  VAL A  65     -11.397 106.267  12.119  1.00 75.30           C  
ATOM    511  CG1 VAL A  65     -11.664 107.769  12.129  1.00 75.28           C  
ATOM    512  CG2 VAL A  65     -10.318 105.944  13.146  1.00 75.84           C  
ATOM    513  N   LYS A  66     -14.130 105.471  10.406  1.00 79.62           N  
ATOM    514  CA  LYS A  66     -15.312 105.891   9.575  1.00 76.98           C  
ATOM    515  C   LYS A  66     -16.588 105.366  10.175  1.00 71.73           C  
ATOM    516  O   LYS A  66     -17.511 106.131  10.372  1.00 72.49           O  
ATOM    517  CB  LYS A  66     -15.198 105.437   8.110  1.00 82.10           C  
ATOM    518  CG  LYS A  66     -14.020 106.113   7.471  1.00 88.06           C  
ATOM    519  CD  LYS A  66     -13.755 105.655   6.058  1.00 94.70           C  
ATOM    520  CE  LYS A  66     -12.774 106.609   5.399  1.00 98.83           C  
ATOM    521  NZ  LYS A  66     -12.306 106.101   4.087  1.00102.88           N1+
ATOM    522  N   TYR A  67     -16.606 104.062  10.462  1.00 67.64           N  
ATOM    523  CA  TYR A  67     -17.733 103.369  11.118  1.00 63.80           C  
ATOM    524  C   TYR A  67     -18.162 104.049  12.412  1.00 61.26           C  
ATOM    525  O   TYR A  67     -19.350 104.270  12.629  1.00 58.53           O  
ATOM    526  CB  TYR A  67     -17.360 101.887  11.350  1.00 64.87           C  
ATOM    527  CG  TYR A  67     -17.977 101.149  12.535  1.00 65.66           C  
ATOM    528  CD1 TYR A  67     -17.157 100.536  13.493  1.00 66.01           C  
ATOM    529  CD2 TYR A  67     -19.360 101.011  12.677  1.00 64.86           C  
ATOM    530  CE1 TYR A  67     -17.689  99.831  14.563  1.00 65.60           C  
ATOM    531  CE2 TYR A  67     -19.902 100.310  13.757  1.00 65.88           C  
ATOM    532  CZ  TYR A  67     -19.059  99.719  14.694  1.00 65.70           C  
ATOM    533  OH  TYR A  67     -19.565  99.014  15.765  1.00 65.23           O  
ATOM    534  N   MET A  68     -17.186 104.393  13.247  1.00 58.89           N  
ATOM    535  CA  MET A  68     -17.446 105.055  14.525  1.00 57.20           C  
ATOM    536  C   MET A  68     -17.871 106.517  14.402  1.00 60.14           C  
ATOM    537  O   MET A  68     -18.504 107.047  15.311  1.00 57.57           O  
ATOM    538  CB  MET A  68     -16.216 104.953  15.428  1.00 56.87           C  
ATOM    539  CG  MET A  68     -15.972 103.550  15.962  1.00 56.28           C  
ATOM    540  SD  MET A  68     -17.168 103.044  17.214  1.00 50.85           S  
ATOM    541  CE  MET A  68     -16.730 104.076  18.614  1.00 50.43           C  
ATOM    542  N   HIS A  69     -17.496 107.169  13.302  1.00 64.78           N  
ATOM    543  CA  HIS A  69     -17.932 108.539  12.994  1.00 63.53           C  
ATOM    544  C   HIS A  69     -19.323 108.573  12.336  1.00 62.95           C  
ATOM    545  O   HIS A  69     -20.011 109.592  12.417  1.00 67.29           O  
ATOM    546  CB  HIS A  69     -16.890 109.213  12.087  1.00 64.34           C  
ATOM    547  CG  HIS A  69     -17.103 110.682  11.890  1.00 64.54           C  
ATOM    548  ND1 HIS A  69     -17.102 111.586  12.931  1.00 64.96           N  
ATOM    549  CD2 HIS A  69     -17.300 111.407  10.766  1.00 63.64           C  
ATOM    550  CE1 HIS A  69     -17.304 112.802  12.458  1.00 62.81           C  
ATOM    551  NE2 HIS A  69     -17.429 112.721  11.147  1.00 63.80           N  
ATOM    552  N   SER A  70     -19.738 107.459  11.724  1.00 60.48           N  
ATOM    553  CA  SER A  70     -20.941 107.403  10.869  1.00 60.49           C  
ATOM    554  C   SER A  70     -22.266 107.766  11.554  1.00 61.77           C  
ATOM    555  O   SER A  70     -23.143 108.352  10.926  1.00 65.17           O  
ATOM    556  CB  SER A  70     -21.074 106.020  10.212  1.00 57.85           C  
ATOM    557  OG  SER A  70     -21.423 105.026  11.156  1.00 55.79           O  
ATOM    558  N   GLY A  71     -22.413 107.393  12.822  1.00 61.42           N  
ATOM    559  CA  GLY A  71     -23.600 107.738  13.609  1.00 58.55           C  
ATOM    560  C   GLY A  71     -23.208 108.154  15.012  1.00 58.29           C  
ATOM    561  O   GLY A  71     -22.020 108.207  15.335  1.00 60.20           O  
ATOM    562  N   PRO A  72     -24.202 108.464  15.860  1.00 58.35           N  
ATOM    563  CA  PRO A  72     -23.898 108.800  17.255  1.00 57.33           C  
ATOM    564  C   PRO A  72     -23.615 107.588  18.117  1.00 54.56           C  
ATOM    565  O   PRO A  72     -24.043 106.482  17.792  1.00 51.13           O  
ATOM    566  CB  PRO A  72     -25.181 109.462  17.742  1.00 57.46           C  
ATOM    567  CG  PRO A  72     -26.243 108.865  16.904  1.00 57.54           C  
ATOM    568  CD  PRO A  72     -25.630 108.651  15.551  1.00 57.49           C  
ATOM    569  N   VAL A  73     -22.920 107.831  19.225  1.00 53.72           N  
ATOM    570  CA  VAL A  73     -22.602 106.807  20.222  1.00 55.03           C  
ATOM    571  C   VAL A  73     -23.125 107.236  21.589  1.00 52.81           C  
ATOM    572  O   VAL A  73     -23.259 108.431  21.857  1.00 51.98           O  
ATOM    573  CB  VAL A  73     -21.072 106.525  20.318  1.00 56.19           C  
ATOM    574  CG1 VAL A  73     -20.561 105.979  18.998  1.00 55.90           C  
ATOM    575  CG2 VAL A  73     -20.266 107.759  20.731  1.00 54.86           C  
ATOM    576  N   VAL A  74     -23.424 106.257  22.438  1.00 50.27           N  
ATOM    577  CA  VAL A  74     -23.720 106.517  23.840  1.00 48.35           C  
ATOM    578  C   VAL A  74     -22.434 106.258  24.611  1.00 46.70           C  
ATOM    579  O   VAL A  74     -22.017 105.113  24.757  1.00 46.54           O  
ATOM    580  CB  VAL A  74     -24.853 105.626  24.379  1.00 47.14           C  
ATOM    581  CG1 VAL A  74     -25.192 106.015  25.805  1.00 47.71           C  
ATOM    582  CG2 VAL A  74     -26.098 105.746  23.516  1.00 47.48           C  
ATOM    583  N   ALA A  75     -21.801 107.333  25.068  1.00 45.43           N  
ATOM    584  CA  ALA A  75     -20.622 107.241  25.921  1.00 46.03           C  
ATOM    585  C   ALA A  75     -21.073 107.135  27.365  1.00 47.95           C  
ATOM    586  O   ALA A  75     -21.994 107.846  27.777  1.00 48.20           O  
ATOM    587  CB  ALA A  75     -19.736 108.461  25.732  1.00 45.95           C  
ATOM    588  N   MET A  76     -20.425 106.254  28.131  1.00 49.89           N  
ATOM    589  CA  MET A  76     -20.799 105.989  29.531  1.00 50.03           C  
ATOM    590  C   MET A  76     -19.587 105.782  30.439  1.00 48.62           C  
ATOM    591  O   MET A  76     -18.504 105.421  29.975  1.00 48.57           O  
ATOM    592  CB  MET A  76     -21.663 104.731  29.623  1.00 51.86           C  
ATOM    593  CG  MET A  76     -22.856 104.701  28.696  1.00 53.02           C  
ATOM    594  SD  MET A  76     -23.968 103.348  29.101  1.00 55.44           S  
ATOM    595  CE  MET A  76     -23.166 101.996  28.251  1.00 55.41           C  
ATOM    596  N   VAL A  77     -19.798 105.989  31.736  1.00 47.19           N  
ATOM    597  CA  VAL A  77     -18.809 105.673  32.768  1.00 47.93           C  
ATOM    598  C   VAL A  77     -19.534 104.956  33.900  1.00 49.06           C  
ATOM    599  O   VAL A  77     -20.525 105.468  34.424  1.00 48.52           O  
ATOM    600  CB  VAL A  77     -18.118 106.938  33.319  1.00 49.28           C  
ATOM    601  CG1 VAL A  77     -17.093 106.599  34.394  1.00 49.71           C  
ATOM    602  CG2 VAL A  77     -17.435 107.707  32.198  1.00 50.24           C  
ATOM    603  N   TRP A  78     -19.036 103.771  34.263  1.00 50.93           N  
ATOM    604  CA  TRP A  78     -19.635 102.928  35.311  1.00 50.06           C  
ATOM    605  C   TRP A  78     -18.629 102.679  36.426  1.00 50.91           C  
ATOM    606  O   TRP A  78     -17.439 102.527  36.161  1.00 50.92           O  
ATOM    607  CB  TRP A  78     -20.089 101.589  34.724  1.00 47.96           C  
ATOM    608  CG  TRP A  78     -21.263 101.711  33.819  1.00 44.03           C  
ATOM    609  CD1 TRP A  78     -21.243 101.934  32.475  1.00 42.98           C  
ATOM    610  CD2 TRP A  78     -22.632 101.638  34.194  1.00 41.47           C  
ATOM    611  NE1 TRP A  78     -22.521 102.005  31.985  1.00 41.79           N  
ATOM    612  CE2 TRP A  78     -23.397 101.823  33.018  1.00 41.77           C  
ATOM    613  CE3 TRP A  78     -23.294 101.436  35.409  1.00 40.31           C  
ATOM    614  CZ2 TRP A  78     -24.794 101.810  33.020  1.00 41.08           C  
ATOM    615  CZ3 TRP A  78     -24.682 101.417  35.414  1.00 40.08           C  
ATOM    616  CH2 TRP A  78     -25.418 101.604  34.223  1.00 40.63           C  
ATOM    617  N   GLU A  79     -19.117 102.629  37.664  1.00 53.08           N  
ATOM    618  CA  GLU A  79     -18.262 102.453  38.837  1.00 55.58           C  
ATOM    619  C   GLU A  79     -18.550 101.153  39.595  1.00 55.91           C  
ATOM    620  O   GLU A  79     -19.710 100.770  39.758  1.00 56.35           O  
ATOM    621  CB  GLU A  79     -18.429 103.640  39.792  1.00 58.64           C  
ATOM    622  CG  GLU A  79     -18.006 103.347  41.228  1.00 62.96           C  
ATOM    623  CD  GLU A  79     -18.104 104.548  42.127  1.00 65.35           C  
ATOM    624  OE1 GLU A  79     -18.963 104.528  43.036  1.00 68.64           O  
ATOM    625  OE2 GLU A  79     -17.339 105.515  41.914  1.00 66.28           O1-
ATOM    626  N   GLY A  80     -17.486 100.519  40.093  1.00 54.80           N  
ATOM    627  CA  GLY A  80     -17.600  99.408  41.042  1.00 53.32           C  
ATOM    628  C   GLY A  80     -16.378  98.516  41.104  1.00 51.84           C  
ATOM    629  O   GLY A  80     -15.431  98.686  40.332  1.00 52.03           O  
ATOM    630  N   LEU A  81     -16.413  97.552  42.021  1.00 51.04           N  
ATOM    631  CA  LEU A  81     -15.314  96.599  42.209  1.00 51.33           C  
ATOM    632  C   LEU A  81     -15.024  95.819  40.929  1.00 50.51           C  
ATOM    633  O   LEU A  81     -15.890  95.103  40.426  1.00 49.64           O  
ATOM    634  CB  LEU A  81     -15.643  95.613  43.339  1.00 52.62           C  
ATOM    635  CG  LEU A  81     -14.573  94.582  43.724  1.00 53.00           C  
ATOM    636  CD1 LEU A  81     -13.411  95.258  44.437  1.00 54.26           C  
ATOM    637  CD2 LEU A  81     -15.164  93.485  44.592  1.00 52.82           C  
ATOM    638  N   ASN A  82     -13.797  95.956  40.424  1.00 51.02           N  
ATOM    639  CA  ASN A  82     -13.349  95.288  39.190  1.00 51.77           C  
ATOM    640  C   ASN A  82     -14.287  95.533  38.015  1.00 49.33           C  
ATOM    641  O   ASN A  82     -14.540  94.637  37.213  1.00 46.29           O  
ATOM    642  CB  ASN A  82     -13.162  93.786  39.428  1.00 53.30           C  
ATOM    643  CG  ASN A  82     -11.985  93.487  40.318  1.00 57.16           C  
ATOM    644  OD1 ASN A  82     -10.841  93.818  39.991  1.00 60.06           O  
ATOM    645  ND2 ASN A  82     -12.251  92.850  41.453  1.00 60.78           N  
ATOM    646  N   VAL A  83     -14.796  96.759  37.924  1.00 49.55           N  
ATOM    647  CA  VAL A  83     -15.724  97.117  36.861  1.00 50.16           C  
ATOM    648  C   VAL A  83     -15.063  97.019  35.482  1.00 49.56           C  
ATOM    649  O   VAL A  83     -15.730  96.670  34.511  1.00 54.54           O  
ATOM    650  CB  VAL A  83     -16.395  98.496  37.101  1.00 51.80           C  
ATOM    651  CG1 VAL A  83     -15.415  99.666  36.941  1.00 53.36           C  
ATOM    652  CG2 VAL A  83     -17.598  98.672  36.199  1.00 54.00           C  
ATOM    653  N   VAL A  84     -13.761  97.286  35.398  1.00 48.71           N  
ATOM    654  CA  VAL A  84     -13.035  97.192  34.123  1.00 47.78           C  
ATOM    655  C   VAL A  84     -12.967  95.740  33.644  1.00 48.25           C  
ATOM    656  O   VAL A  84     -13.321  95.445  32.501  1.00 45.47           O  
ATOM    657  CB  VAL A  84     -11.606  97.774  34.230  1.00 47.30           C  
ATOM    658  CG1 VAL A  84     -10.825  97.560  32.942  1.00 45.55           C  
ATOM    659  CG2 VAL A  84     -11.647  99.263  34.547  1.00 47.66           C  
ATOM    660  N   LYS A  85     -12.507  94.850  34.524  1.00 51.68           N  
ATOM    661  CA  LYS A  85     -12.357  93.433  34.190  1.00 55.09           C  
ATOM    662  C   LYS A  85     -13.712  92.760  33.992  1.00 54.27           C  
ATOM    663  O   LYS A  85     -13.936  92.112  32.970  1.00 54.30           O  
ATOM    664  CB  LYS A  85     -11.562  92.690  35.261  1.00 61.33           C  
ATOM    665  CG  LYS A  85     -11.094  91.312  34.813  1.00 69.66           C  
ATOM    666  CD  LYS A  85     -10.595  90.460  35.972  1.00 77.01           C  
ATOM    667  CE  LYS A  85     -10.273  89.047  35.502  1.00 81.16           C  
ATOM    668  NZ  LYS A  85      -9.575  88.240  36.540  1.00 85.20           N1+
ATOM    669  N   THR A  86     -14.606  92.923  34.966  1.00 52.58           N  
ATOM    670  CA  THR A  86     -15.953  92.345  34.891  1.00 53.04           C  
ATOM    671  C   THR A  86     -16.771  92.935  33.732  1.00 52.60           C  
ATOM    672  O   THR A  86     -17.545  92.222  33.082  1.00 52.93           O  
ATOM    673  CB  THR A  86     -16.740  92.536  36.206  1.00 52.56           C  
ATOM    674  OG1 THR A  86     -15.888  92.279  37.323  1.00 49.02           O  
ATOM    675  CG2 THR A  86     -17.929  91.583  36.271  1.00 54.44           C  
ATOM    676  N   GLY A  87     -16.598  94.229  33.483  1.00 51.66           N  
ATOM    677  CA  GLY A  87     -17.232  94.895  32.347  1.00 53.51           C  
ATOM    678  C   GLY A  87     -16.828  94.269  31.029  1.00 51.97           C  
ATOM    679  O   GLY A  87     -17.679  93.984  30.187  1.00 51.77           O  
ATOM    680  N   ARG A  88     -15.528  94.052  30.867  1.00 51.20           N  
ATOM    681  CA  ARG A  88     -14.996  93.322  29.712  1.00 52.58           C  
ATOM    682  C   ARG A  88     -15.599  91.926  29.541  1.00 48.31           C  
ATOM    683  O   ARG A  88     -15.908  91.515  28.421  1.00 45.31           O  
ATOM    684  CB  ARG A  88     -13.470  93.227  29.797  1.00 55.69           C  
ATOM    685  CG  ARG A  88     -12.757  94.395  29.112  1.00 60.74           C  
ATOM    686  CD  ARG A  88     -12.348  93.982  27.712  1.00 65.19           C  
ATOM    687  NE  ARG A  88     -11.830  95.091  26.900  1.00 69.09           N  
ATOM    688  CZ  ARG A  88     -11.279  94.965  25.695  1.00 70.52           C  
ATOM    689  NH1 ARG A  88     -11.153  93.773  25.124  1.00 70.63           N1+
ATOM    690  NH2 ARG A  88     -10.849  96.046  25.043  1.00 74.98           N  
ATOM    691  N   VAL A  89     -15.767  91.214  30.654  1.00 47.55           N  
ATOM    692  CA  VAL A  89     -16.371  89.875  30.655  1.00 47.23           C  
ATOM    693  C   VAL A  89     -17.835  89.932  30.190  1.00 46.17           C  
ATOM    694  O   VAL A  89     -18.250  89.116  29.363  1.00 44.91           O  
ATOM    695  CB  VAL A  89     -16.247  89.185  32.046  1.00 45.74           C  
ATOM    696  CG1 VAL A  89     -17.073  87.904  32.120  1.00 45.48           C  
ATOM    697  CG2 VAL A  89     -14.793  88.862  32.351  1.00 45.15           C  
ATOM    698  N   MET A  90     -18.592  90.892  30.718  1.00 45.72           N  
ATOM    699  CA  MET A  90     -19.997  91.099  30.331  1.00 47.22           C  
ATOM    700  C   MET A  90     -20.161  91.444  28.855  1.00 46.89           C  
ATOM    701  O   MET A  90     -21.124  91.015  28.223  1.00 48.12           O  
ATOM    702  CB  MET A  90     -20.633  92.213  31.165  1.00 47.98           C  
ATOM    703  CG  MET A  90     -20.884  91.847  32.619  1.00 48.92           C  
ATOM    704  SD  MET A  90     -21.202  93.296  33.652  1.00 48.10           S  
ATOM    705  CE  MET A  90     -22.560  94.077  32.775  1.00 48.81           C  
ATOM    706  N   LEU A  91     -19.242  92.247  28.326  1.00 47.15           N  
ATOM    707  CA  LEU A  91     -19.215  92.560  26.890  1.00 46.88           C  
ATOM    708  C   LEU A  91     -18.977  91.313  26.041  1.00 48.24           C  
ATOM    709  O   LEU A  91     -19.585  91.154  24.977  1.00 48.59           O  
ATOM    710  CB  LEU A  91     -18.152  93.621  26.574  1.00 46.17           C  
ATOM    711  CG  LEU A  91     -18.628  95.077  26.547  1.00 46.54           C  
ATOM    712  CD1 LEU A  91     -19.274  95.522  27.851  1.00 47.40           C  
ATOM    713  CD2 LEU A  91     -17.460  95.986  26.201  1.00 47.09           C  
ATOM    714  N   GLY A  92     -18.102  90.432  26.526  1.00 48.90           N  
ATOM    715  CA  GLY A  92     -17.683  89.242  25.787  1.00 48.44           C  
ATOM    716  C   GLY A  92     -16.466  89.576  24.951  1.00 48.56           C  
ATOM    717  O   GLY A  92     -15.967  90.704  25.002  1.00 47.64           O  
ATOM    718  N   GLU A  93     -16.001  88.605  24.170  1.00 50.34           N  
ATOM    719  CA  GLU A  93     -14.782  88.767  23.367  1.00 51.88           C  
ATOM    720  C   GLU A  93     -15.005  89.806  22.279  1.00 50.65           C  
ATOM    721  O   GLU A  93     -16.115  89.940  21.774  1.00 50.28           O  
ATOM    722  CB  GLU A  93     -14.351  87.443  22.722  1.00 54.56           C  
ATOM    723  CG  GLU A  93     -14.076  86.295  23.691  1.00 58.58           C  
ATOM    724  CD  GLU A  93     -13.019  86.611  24.741  1.00 62.00           C  
ATOM    725  OE1 GLU A  93     -13.128  86.083  25.874  1.00 62.44           O  
ATOM    726  OE2 GLU A  93     -12.075  87.379  24.440  1.00 65.79           O1-
ATOM    727  N   THR A  94     -13.949  90.544  21.933  1.00 51.26           N  
ATOM    728  CA  THR A  94     -14.036  91.656  20.971  1.00 49.97           C  
ATOM    729  C   THR A  94     -14.598  91.182  19.632  1.00 50.14           C  
ATOM    730  O   THR A  94     -15.434  91.860  19.037  1.00 51.70           O  
ATOM    731  CB  THR A  94     -12.667  92.349  20.776  1.00 48.34           C  
ATOM    732  OG1 THR A  94     -12.155  92.751  22.051  1.00 45.55           O  
ATOM    733  CG2 THR A  94     -12.788  93.587  19.892  1.00 49.03           C  
ATOM    734  N   ASN A  95     -14.137  90.022  19.175  1.00 51.52           N  
ATOM    735  CA  ASN A  95     -14.747  89.340  18.044  1.00 53.46           C  
ATOM    736  C   ASN A  95     -16.001  88.625  18.542  1.00 53.38           C  
ATOM    737  O   ASN A  95     -15.898  87.763  19.412  1.00 54.09           O  
ATOM    738  CB  ASN A  95     -13.783  88.321  17.431  1.00 54.66           C  
ATOM    739  CG  ASN A  95     -14.255  87.801  16.078  1.00 56.16           C  
ATOM    740  OD1 ASN A  95     -15.443  87.821  15.750  1.00 55.76           O  
ATOM    741  ND2 ASN A  95     -13.311  87.346  15.275  1.00 59.39           N  
ATOM    742  N   PRO A  96     -17.185  88.976  17.997  1.00 54.87           N  
ATOM    743  CA  PRO A  96     -18.415  88.287  18.410  1.00 55.96           C  
ATOM    744  C   PRO A  96     -18.450  86.788  18.091  1.00 56.52           C  
ATOM    745  O   PRO A  96     -19.175  86.045  18.756  1.00 55.68           O  
ATOM    746  CB  PRO A  96     -19.517  89.022  17.635  1.00 56.32           C  
ATOM    747  CG  PRO A  96     -18.920  90.317  17.213  1.00 55.50           C  
ATOM    748  CD  PRO A  96     -17.467  90.046  17.021  1.00 55.16           C  
ATOM    749  N   ALA A  97     -17.678  86.356  17.092  1.00 57.41           N  
ATOM    750  CA  ALA A  97     -17.504  84.929  16.790  1.00 56.90           C  
ATOM    751  C   ALA A  97     -17.049  84.128  18.016  1.00 56.73           C  
ATOM    752  O   ALA A  97     -17.472  82.994  18.200  1.00 54.85           O  
ATOM    753  CB  ALA A  97     -16.517  84.751  15.643  1.00 56.76           C  
ATOM    754  N   ASP A  98     -16.196  84.729  18.847  1.00 59.22           N  
ATOM    755  CA  ASP A  98     -15.697  84.091  20.074  1.00 61.71           C  
ATOM    756  C   ASP A  98     -16.573  84.334  21.302  1.00 60.32           C  
ATOM    757  O   ASP A  98     -16.439  83.623  22.300  1.00 64.84           O  
ATOM    758  CB  ASP A  98     -14.282  84.586  20.390  1.00 65.31           C  
ATOM    759  CG  ASP A  98     -13.310  84.380  19.238  1.00 67.79           C  
ATOM    760  OD1 ASP A  98     -12.464  85.279  19.017  1.00 70.63           O  
ATOM    761  OD2 ASP A  98     -13.391  83.330  18.558  1.00 66.90           O1-
ATOM    762  N   SER A  99     -17.445  85.340  21.240  1.00 58.59           N  
ATOM    763  CA  SER A  99     -18.260  85.749  22.387  1.00 55.48           C  
ATOM    764  C   SER A  99     -19.278  84.694  22.780  1.00 54.44           C  
ATOM    765  O   SER A  99     -19.899  84.078  21.921  1.00 53.79           O  
ATOM    766  CB  SER A  99     -18.984  87.062  22.096  1.00 55.09           C  
ATOM    767  OG  SER A  99     -18.066  88.136  22.025  1.00 52.90           O  
ATOM    768  N   LYS A 100     -19.428  84.490  24.088  1.00 56.27           N  
ATOM    769  CA  LYS A 100     -20.315  83.459  24.635  1.00 56.90           C  
ATOM    770  C   LYS A 100     -21.733  83.980  24.754  1.00 53.77           C  
ATOM    771  O   LYS A 100     -21.925  85.166  25.025  1.00 54.78           O  
ATOM    772  CB  LYS A 100     -19.857  83.036  26.036  1.00 59.24           C  
ATOM    773  CG  LYS A 100     -18.437  82.510  26.128  1.00 61.56           C  
ATOM    774  CD  LYS A 100     -18.232  81.292  25.249  1.00 63.81           C  
ATOM    775  CE  LYS A 100     -16.873  80.674  25.483  1.00 65.97           C  
ATOM    776  NZ  LYS A 100     -16.578  79.720  24.385  1.00 70.14           N1+
ATOM    777  N   PRO A 101     -22.737  83.097  24.566  1.00 50.16           N  
ATOM    778  CA  PRO A 101     -24.101  83.468  24.931  1.00 49.50           C  
ATOM    779  C   PRO A 101     -24.165  83.881  26.400  1.00 49.57           C  
ATOM    780  O   PRO A 101     -23.485  83.289  27.239  1.00 47.50           O  
ATOM    781  CB  PRO A 101     -24.886  82.186  24.679  1.00 47.76           C  
ATOM    782  CG  PRO A 101     -24.155  81.549  23.556  1.00 48.20           C  
ATOM    783  CD  PRO A 101     -22.706  81.830  23.818  1.00 48.73           C  
ATOM    784  N   GLY A 102     -24.961  84.909  26.677  1.00 49.11           N  
ATOM    785  CA  GLY A 102     -24.975  85.579  27.973  1.00 49.45           C  
ATOM    786  C   GLY A 102     -24.273  86.929  27.964  1.00 48.37           C  
ATOM    787  O   GLY A 102     -24.649  87.815  28.724  1.00 48.21           O  
ATOM    788  N   THR A 103     -23.255  87.078  27.119  1.00 47.73           N  
ATOM    789  CA  THR A 103     -22.540  88.345  26.965  1.00 48.10           C  
ATOM    790  C   THR A 103     -23.262  89.249  25.966  1.00 47.14           C  
ATOM    791  O   THR A 103     -24.049  88.776  25.144  1.00 47.00           O  
ATOM    792  CB  THR A 103     -21.089  88.128  26.479  1.00 49.71           C  
ATOM    793  OG1 THR A 103     -21.089  87.550  25.167  1.00 52.87           O  
ATOM    794  CG2 THR A 103     -20.317  87.213  27.430  1.00 49.85           C  
ATOM    795  N   ILE A 104     -22.979  90.548  26.038  1.00 47.74           N  
ATOM    796  CA  ILE A 104     -23.653  91.555  25.195  1.00 47.09           C  
ATOM    797  C   ILE A 104     -23.391  91.287  23.710  1.00 47.46           C  
ATOM    798  O   ILE A 104     -24.328  91.180  22.920  1.00 46.17           O  
ATOM    799  CB  ILE A 104     -23.249  93.001  25.592  1.00 44.61           C  
ATOM    800  CG1 ILE A 104     -23.858  93.352  26.952  1.00 45.15           C  
ATOM    801  CG2 ILE A 104     -23.708  94.014  24.553  1.00 43.58           C  
ATOM    802  CD1 ILE A 104     -23.242  94.554  27.636  1.00 46.10           C  
ATOM    803  N   ARG A 105     -22.120  91.175  23.338  1.00 48.55           N  
ATOM    804  CA  ARG A 105     -21.761  90.862  21.950  1.00 48.54           C  
ATOM    805  C   ARG A 105     -22.239  89.464  21.551  1.00 46.87           C  
ATOM    806  O   ARG A 105     -22.696  89.264  20.428  1.00 48.92           O  
ATOM    807  CB  ARG A 105     -20.252  90.985  21.725  1.00 49.37           C  
ATOM    808  CG  ARG A 105     -19.711  92.403  21.824  1.00 50.32           C  
ATOM    809  CD  ARG A 105     -18.307  92.467  21.239  1.00 51.52           C  
ATOM    810  NE  ARG A 105     -17.620  93.740  21.492  1.00 52.36           N  
ATOM    811  CZ  ARG A 105     -16.736  93.977  22.469  1.00 52.72           C  
ATOM    812  NH1 ARG A 105     -16.382  93.037  23.345  1.00 54.66           N1+
ATOM    813  NH2 ARG A 105     -16.195  95.186  22.575  1.00 53.65           N  
ATOM    814  N   GLY A 106     -22.145  88.511  22.477  1.00 44.90           N  
ATOM    815  CA  GLY A 106     -22.589  87.147  22.233  1.00 45.50           C  
ATOM    816  C   GLY A 106     -24.075  87.046  21.951  1.00 47.81           C  
ATOM    817  O   GLY A 106     -24.498  86.280  21.080  1.00 49.30           O  
ATOM    818  N   ASP A 107     -24.867  87.834  22.672  1.00 47.33           N  
ATOM    819  CA  ASP A 107     -26.310  87.857  22.480  1.00 46.44           C  
ATOM    820  C   ASP A 107     -26.771  88.698  21.286  1.00 45.76           C  
ATOM    821  O   ASP A 107     -27.758  88.335  20.647  1.00 45.78           O  
ATOM    822  CB  ASP A 107     -27.012  88.352  23.754  1.00 47.87           C  
ATOM    823  CG  ASP A 107     -26.951  87.343  24.901  1.00 48.60           C  
ATOM    824  OD1 ASP A 107     -26.795  86.125  24.649  1.00 50.94           O  
ATOM    825  OD2 ASP A 107     -27.079  87.770  26.072  1.00 47.44           O1-
ATOM    826  N   PHE A 108     -26.068  89.793  20.978  1.00 46.46           N  
ATOM    827  CA  PHE A 108     -26.621  90.859  20.108  1.00 48.00           C  
ATOM    828  C   PHE A 108     -25.896  91.213  18.792  1.00 49.11           C  
ATOM    829  O   PHE A 108     -26.382  92.074  18.062  1.00 51.31           O  
ATOM    830  CB  PHE A 108     -26.828  92.144  20.935  1.00 46.70           C  
ATOM    831  CG  PHE A 108     -27.827  91.990  22.051  1.00 45.83           C  
ATOM    832  CD1 PHE A 108     -29.143  91.637  21.773  1.00 44.55           C  
ATOM    833  CD2 PHE A 108     -27.457  92.191  23.380  1.00 45.68           C  
ATOM    834  CE1 PHE A 108     -30.064  91.485  22.792  1.00 43.85           C  
ATOM    835  CE2 PHE A 108     -28.380  92.035  24.405  1.00 44.43           C  
ATOM    836  CZ  PHE A 108     -29.683  91.679  24.111  1.00 43.37           C  
ATOM    837  N   CYS A 109     -24.776  90.575  18.459  1.00 48.80           N  
ATOM    838  CA  CYS A 109     -24.079  90.916  17.207  1.00 48.75           C  
ATOM    839  C   CYS A 109     -23.242  89.770  16.648  1.00 49.56           C  
ATOM    840  O   CYS A 109     -22.980  88.790  17.344  1.00 49.41           O  
ATOM    841  CB  CYS A 109     -23.228  92.172  17.397  1.00 49.22           C  
ATOM    842  SG  CYS A 109     -21.814  91.964  18.493  1.00 51.02           S  
ATOM    843  N   ILE A 110     -22.828  89.918  15.385  1.00 50.33           N  
ATOM    844  CA  ILE A 110     -22.282  88.819  14.570  1.00 51.87           C  
ATOM    845  C   ILE A 110     -20.842  89.047  14.079  1.00 53.42           C  
ATOM    846  O   ILE A 110     -19.978  88.193  14.281  1.00 52.00           O  
ATOM    847  CB  ILE A 110     -23.203  88.549  13.355  1.00 51.77           C  
ATOM    848  CG1 ILE A 110     -24.558  88.012  13.830  1.00 52.34           C  
ATOM    849  CG2 ILE A 110     -22.571  87.545  12.391  1.00 52.31           C  
ATOM    850  CD1 ILE A 110     -25.663  88.097  12.799  1.00 52.59           C  
ATOM    851  N   GLN A 111     -20.605  90.175  13.410  1.00 57.88           N  
ATOM    852  CA  GLN A 111     -19.313  90.464  12.776  1.00 61.33           C  
ATOM    853  C   GLN A 111     -18.466  91.407  13.629  1.00 58.85           C  
ATOM    854  O   GLN A 111     -18.995  92.313  14.273  1.00 58.09           O  
ATOM    855  CB  GLN A 111     -19.541  91.086  11.398  1.00 67.97           C  
ATOM    856  CG  GLN A 111     -18.339  90.993  10.467  1.00 73.41           C  
ATOM    857  CD  GLN A 111     -18.467  91.907   9.261  1.00 77.36           C  
ATOM    858  OE1 GLN A 111     -18.431  93.133   9.398  1.00 86.08           O  
ATOM    859  NE2 GLN A 111     -18.628  91.323   8.075  1.00 77.15           N  
ATOM    860  N   VAL A 112     -17.150  91.197  13.609  1.00 57.15           N  
ATOM    861  CA  VAL A 112     -16.209  92.021  14.384  1.00 55.44           C  
ATOM    862  C   VAL A 112     -16.258  93.510  14.003  1.00 55.23           C  
ATOM    863  O   VAL A 112     -16.139  94.374  14.874  1.00 53.32           O  
ATOM    864  CB  VAL A 112     -14.760  91.460  14.317  1.00 54.48           C  
ATOM    865  CG1 VAL A 112     -14.148  91.621  12.927  1.00 56.04           C  
ATOM    866  CG2 VAL A 112     -13.871  92.102  15.378  1.00 53.16           C  
ATOM    867  N   GLY A 113     -16.441  93.801  12.715  1.00 56.49           N  
ATOM    868  CA  GLY A 113     -16.549  95.184  12.224  1.00 57.39           C  
ATOM    869  C   GLY A 113     -17.771  95.965  12.689  1.00 56.80           C  
ATOM    870  O   GLY A 113     -17.769  97.197  12.663  1.00 51.42           O  
ATOM    871  N   ARG A 114     -18.817  95.242  13.096  1.00 57.20           N  
ATOM    872  CA  ARG A 114     -20.029  95.827  13.665  1.00 55.51           C  
ATOM    873  C   ARG A 114     -20.345  95.149  15.003  1.00 53.31           C  
ATOM    874  O   ARG A 114     -21.324  94.401  15.113  1.00 50.92           O  
ATOM    875  CB  ARG A 114     -21.192  95.635  12.693  1.00 55.57           C  
ATOM    876  CG  ARG A 114     -21.011  96.297  11.337  1.00 55.74           C  
ATOM    877  CD  ARG A 114     -21.228  97.796  11.407  1.00 56.87           C  
ATOM    878  NE  ARG A 114     -21.001  98.425  10.103  1.00 57.28           N  
ATOM    879  CZ  ARG A 114     -19.814  98.788   9.608  1.00 57.64           C  
ATOM    880  NH1 ARG A 114     -18.678  98.589  10.282  1.00 59.14           N1+
ATOM    881  NH2 ARG A 114     -19.760  99.352   8.405  1.00 57.57           N  
ATOM    882  N   ASN A 115     -19.521  95.428  16.015  1.00 51.16           N  
ATOM    883  CA  ASN A 115     -19.607  94.728  17.311  1.00 50.57           C  
ATOM    884  C   ASN A 115     -20.176  95.573  18.474  1.00 50.05           C  
ATOM    885  O   ASN A 115     -19.792  95.392  19.639  1.00 49.05           O  
ATOM    886  CB  ASN A 115     -18.250  94.092  17.663  1.00 50.56           C  
ATOM    887  CG  ASN A 115     -17.179  95.111  17.974  1.00 52.38           C  
ATOM    888  OD1 ASN A 115     -17.288  96.282  17.597  1.00 57.49           O  
ATOM    889  ND2 ASN A 115     -16.133  94.678  18.676  1.00 52.72           N  
ATOM    890  N   ILE A 116     -21.066  96.514  18.133  1.00 48.93           N  
ATOM    891  CA  ILE A 116     -22.013  97.225  19.049  1.00 46.96           C  
ATOM    892  C   ILE A 116     -21.539  97.949  20.327  1.00 44.96           C  
ATOM    893  O   ILE A 116     -22.256  98.824  20.806  1.00 46.30           O  
ATOM    894  CB  ILE A 116     -23.244  96.346  19.430  1.00 48.02           C  
ATOM    895  CG1 ILE A 116     -22.839  95.112  20.254  1.00 49.08           C  
ATOM    896  CG2 ILE A 116     -24.011  95.936  18.178  1.00 48.88           C  
ATOM    897  CD1 ILE A 116     -23.987  94.444  20.982  1.00 50.22           C  
ATOM    898  N   ILE A 117     -20.372  97.614  20.876  1.00 43.29           N  
ATOM    899  CA  ILE A 117     -19.965  98.143  22.177  1.00 42.89           C  
ATOM    900  C   ILE A 117     -18.441  98.135  22.349  1.00 44.00           C  
ATOM    901  O   ILE A 117     -17.754  97.272  21.794  1.00 43.30           O  
ATOM    902  CB  ILE A 117     -20.667  97.350  23.314  1.00 43.79           C  
ATOM    903  CG1 ILE A 117     -20.431  97.998  24.680  1.00 43.21           C  
ATOM    904  CG2 ILE A 117     -20.236  95.884  23.312  1.00 44.21           C  
ATOM    905  CD1 ILE A 117     -21.428  97.560  25.726  1.00 41.98           C  
ATOM    906  N   HIS A 118     -17.927  99.124  23.084  1.00 45.78           N  
ATOM    907  CA  HIS A 118     -16.528  99.161  23.522  1.00 47.25           C  
ATOM    908  C   HIS A 118     -16.471  99.198  25.047  1.00 47.39           C  
ATOM    909  O   HIS A 118     -17.276  99.869  25.685  1.00 45.18           O  
ATOM    910  CB  HIS A 118     -15.788 100.391  22.971  1.00 48.87           C  
ATOM    911  CG  HIS A 118     -14.506 100.690  23.691  1.00 51.56           C  
ATOM    912  ND1 HIS A 118     -13.301 100.117  23.343  1.00 52.69           N  
ATOM    913  CD2 HIS A 118     -14.252 101.466  24.775  1.00 53.66           C  
ATOM    914  CE1 HIS A 118     -12.358 100.545  24.164  1.00 55.37           C  
ATOM    915  NE2 HIS A 118     -12.910 101.359  25.047  1.00 54.95           N  
ATOM    916  N   GLY A 119     -15.490  98.496  25.612  1.00 49.29           N  
ATOM    917  CA  GLY A 119     -15.129  98.620  27.029  1.00 50.68           C  
ATOM    918  C   GLY A 119     -13.630  98.815  27.186  1.00 50.46           C  
ATOM    919  O   GLY A 119     -12.848  98.340  26.360  1.00 50.26           O  
ATOM    920  N   SER A 120     -13.227  99.499  28.252  1.00 51.02           N  
ATOM    921  CA  SER A 120     -11.804  99.694  28.551  1.00 52.59           C  
ATOM    922  C   SER A 120     -11.127  98.368  28.905  1.00 53.70           C  
ATOM    923  O   SER A 120     -11.683  97.579  29.670  1.00 53.59           O  
ATOM    924  CB  SER A 120     -11.628 100.675  29.709  1.00 51.42           C  
ATOM    925  OG  SER A 120     -12.299 101.888  29.438  1.00 50.92           O  
ATOM    926  N   ASP A 121      -9.932  98.142  28.354  1.00 57.04           N  
ATOM    927  CA  ASP A 121      -9.168  96.901  28.603  1.00 59.40           C  
ATOM    928  C   ASP A 121      -8.428  96.868  29.948  1.00 58.87           C  
ATOM    929  O   ASP A 121      -8.106  95.786  30.438  1.00 61.93           O  
ATOM    930  CB  ASP A 121      -8.197  96.580  27.450  1.00 62.09           C  
ATOM    931  CG  ASP A 121      -7.124  97.655  27.235  1.00 68.70           C  
ATOM    932  OD1 ASP A 121      -6.540  97.679  26.132  1.00 75.09           O  
ATOM    933  OD2 ASP A 121      -6.859  98.477  28.138  1.00 71.62           O1-
ATOM    934  N   SER A 122      -8.162  98.040  30.531  1.00 56.58           N  
ATOM    935  CA  SER A 122      -7.449  98.141  31.810  1.00 55.75           C  
ATOM    936  C   SER A 122      -7.761  99.443  32.551  1.00 55.42           C  
ATOM    937  O   SER A 122      -8.367 100.366  31.992  1.00 54.85           O  
ATOM    938  CB  SER A 122      -5.940  98.035  31.584  1.00 56.50           C  
ATOM    939  OG  SER A 122      -5.453  99.157  30.859  1.00 59.05           O  
ATOM    940  N   VAL A 123      -7.331  99.501  33.813  1.00 55.26           N  
ATOM    941  CA  VAL A 123      -7.521 100.690  34.663  1.00 55.20           C  
ATOM    942  C   VAL A 123      -6.803 101.900  34.047  1.00 56.46           C  
ATOM    943  O   VAL A 123      -7.342 103.004  34.028  1.00 52.02           O  
ATOM    944  CB  VAL A 123      -7.020 100.452  36.107  1.00 54.23           C  
ATOM    945  CG1 VAL A 123      -7.137 101.716  36.952  1.00 53.09           C  
ATOM    946  CG2 VAL A 123      -7.803  99.326  36.770  1.00 55.72           C  
ATOM    947  N   GLU A 124      -5.593 101.665  33.540  1.00 59.52           N  
ATOM    948  CA  GLU A 124      -4.817 102.667  32.806  1.00 61.49           C  
ATOM    949  C   GLU A 124      -5.585 103.232  31.598  1.00 59.94           C  
ATOM    950  O   GLU A 124      -5.741 104.448  31.483  1.00 58.34           O  
ATOM    951  CB  GLU A 124      -3.496 102.051  32.352  1.00 65.32           C  
ATOM    952  CG  GLU A 124      -2.468 103.022  31.804  1.00 69.92           C  
ATOM    953  CD  GLU A 124      -1.297 102.322  31.119  1.00 73.75           C  
ATOM    954  OE1 GLU A 124      -0.625 101.532  31.807  1.00 73.49           O  
ATOM    955  OE2 GLU A 124      -1.033 102.559  29.906  1.00 76.59           O1-
ATOM    956  N   SER A 125      -6.058 102.350  30.714  1.00 58.35           N  
ATOM    957  CA  SER A 125      -6.858 102.755  29.543  1.00 56.43           C  
ATOM    958  C   SER A 125      -8.156 103.423  29.943  1.00 56.79           C  
ATOM    959  O   SER A 125      -8.600 104.349  29.275  1.00 57.42           O  
ATOM    960  CB  SER A 125      -7.204 101.560  28.656  1.00 57.11           C  
ATOM    961  OG  SER A 125      -6.078 101.118  27.929  1.00 60.10           O  
ATOM    962  N   ALA A 126      -8.767 102.940  31.026  1.00 58.75           N  
ATOM    963  CA  ALA A 126     -10.032 103.491  31.521  1.00 58.50           C  
ATOM    964  C   ALA A 126      -9.900 104.965  31.882  1.00 58.88           C  
ATOM    965  O   ALA A 126     -10.680 105.787  31.409  1.00 55.48           O  
ATOM    966  CB  ALA A 126     -10.532 102.694  32.716  1.00 58.14           C  
ATOM    967  N   GLU A 127      -8.895 105.292  32.694  1.00 61.67           N  
ATOM    968  CA  GLU A 127      -8.660 106.679  33.117  1.00 63.97           C  
ATOM    969  C   GLU A 127      -8.291 107.604  31.955  1.00 62.05           C  
ATOM    970  O   GLU A 127      -8.661 108.777  31.968  1.00 60.87           O  
ATOM    971  CB  GLU A 127      -7.589 106.750  34.214  1.00 68.56           C  
ATOM    972  CG  GLU A 127      -7.966 106.063  35.528  1.00 74.57           C  
ATOM    973  CD  GLU A 127      -9.290 106.543  36.117  1.00 80.09           C  
ATOM    974  OE1 GLU A 127      -9.553 107.768  36.099  1.00 82.72           O  
ATOM    975  OE2 GLU A 127     -10.073 105.696  36.602  1.00 82.17           O1-
ATOM    976  N   LYS A 128      -7.584 107.076  30.954  1.00 62.38           N  
ATOM    977  CA  LYS A 128      -7.268 107.833  29.732  1.00 62.41           C  
ATOM    978  C   LYS A 128      -8.530 108.097  28.902  1.00 61.58           C  
ATOM    979  O   LYS A 128      -8.770 109.226  28.479  1.00 62.47           O  
ATOM    980  CB  LYS A 128      -6.237 107.089  28.873  1.00 63.80           C  
ATOM    981  CG  LYS A 128      -5.631 107.934  27.755  1.00 66.68           C  
ATOM    982  CD  LYS A 128      -5.387 107.142  26.475  1.00 67.93           C  
ATOM    983  CE  LYS A 128      -5.156 108.063  25.284  1.00 67.99           C  
ATOM    984  NZ  LYS A 128      -5.128 107.313  23.995  1.00 68.86           N1+
ATOM    985  N   GLU A 129      -9.323 107.049  28.687  1.00 60.54           N  
ATOM    986  CA  GLU A 129     -10.567 107.133  27.910  1.00 57.93           C  
ATOM    987  C   GLU A 129     -11.652 107.988  28.599  1.00 57.86           C  
ATOM    988  O   GLU A 129     -12.343 108.761  27.933  1.00 54.68           O  
ATOM    989  CB  GLU A 129     -11.092 105.724  27.601  1.00 57.60           C  
ATOM    990  CG  GLU A 129     -10.183 104.928  26.663  1.00 57.75           C  
ATOM    991  CD  GLU A 129     -10.475 103.433  26.616  1.00 57.05           C  
ATOM    992  OE1 GLU A 129      -9.634 102.690  26.072  1.00 58.97           O  
ATOM    993  OE2 GLU A 129     -11.535 102.983  27.103  1.00 56.17           O1-
ATOM    994  N   ILE A 130     -11.786 107.867  29.923  1.00 58.95           N  
ATOM    995  CA  ILE A 130     -12.715 108.717  30.694  1.00 58.61           C  
ATOM    996  C   ILE A 130     -12.344 110.196  30.530  1.00 58.33           C  
ATOM    997  O   ILE A 130     -13.200 111.014  30.179  1.00 58.36           O  
ATOM    998  CB  ILE A 130     -12.764 108.334  32.198  1.00 58.18           C  
ATOM    999  CG1 ILE A 130     -13.456 106.979  32.379  1.00 59.27           C  
ATOM   1000  CG2 ILE A 130     -13.521 109.380  33.022  1.00 57.84           C  
ATOM   1001  CD1 ILE A 130     -13.149 106.300  33.699  1.00 60.21           C  
ATOM   1002  N   GLY A 131     -11.076 110.524  30.794  1.00 56.71           N  
ATOM   1003  CA  GLY A 131     -10.549 111.886  30.616  1.00 55.31           C  
ATOM   1004  C   GLY A 131     -10.718 112.430  29.206  1.00 54.53           C  
ATOM   1005  O   GLY A 131     -10.981 113.617  29.017  1.00 50.21           O  
ATOM   1006  N   LEU A 132     -10.582 111.541  28.225  1.00 55.69           N  
ATOM   1007  CA  LEU A 132     -10.726 111.871  26.806  1.00 55.87           C  
ATOM   1008  C   LEU A 132     -12.174 112.193  26.385  1.00 58.58           C  
ATOM   1009  O   LEU A 132     -12.409 113.174  25.675  1.00 58.07           O  
ATOM   1010  CB  LEU A 132     -10.176 110.714  25.971  1.00 55.42           C  
ATOM   1011  CG  LEU A 132     -10.167 110.800  24.449  1.00 58.52           C  
ATOM   1012  CD1 LEU A 132      -9.474 112.065  23.962  1.00 59.61           C  
ATOM   1013  CD2 LEU A 132      -9.491 109.556  23.884  1.00 59.38           C  
ATOM   1014  N   TRP A 133     -13.129 111.377  26.838  1.00 61.12           N  
ATOM   1015  CA  TRP A 133     -14.549 111.484  26.425  1.00 58.87           C  
ATOM   1016  C   TRP A 133     -15.429 112.402  27.297  1.00 59.03           C  
ATOM   1017  O   TRP A 133     -16.478 112.856  26.836  1.00 58.72           O  
ATOM   1018  CB  TRP A 133     -15.190 110.086  26.367  1.00 56.93           C  
ATOM   1019  CG  TRP A 133     -14.776 109.257  25.184  1.00 54.93           C  
ATOM   1020  CD1 TRP A 133     -13.620 108.555  25.037  1.00 54.04           C  
ATOM   1021  CD2 TRP A 133     -15.534 109.028  23.992  1.00 56.11           C  
ATOM   1022  NE1 TRP A 133     -13.602 107.913  23.830  1.00 53.56           N  
ATOM   1023  CE2 TRP A 133     -14.763 108.183  23.163  1.00 55.62           C  
ATOM   1024  CE3 TRP A 133     -16.792 109.454  23.542  1.00 58.53           C  
ATOM   1025  CZ2 TRP A 133     -15.201 107.755  21.901  1.00 58.19           C  
ATOM   1026  CZ3 TRP A 133     -17.235 109.025  22.284  1.00 60.51           C  
ATOM   1027  CH2 TRP A 133     -16.434 108.181  21.479  1.00 59.56           C  
ATOM   1028  N   PHE A 134     -15.016 112.652  28.542  1.00 60.47           N  
ATOM   1029  CA  PHE A 134     -15.812 113.417  29.510  1.00 63.43           C  
ATOM   1030  C   PHE A 134     -14.997 114.549  30.121  1.00 64.90           C  
ATOM   1031  O   PHE A 134     -13.810 114.378  30.398  1.00 67.94           O  
ATOM   1032  CB  PHE A 134     -16.289 112.499  30.654  1.00 63.53           C  
ATOM   1033  CG  PHE A 134     -17.384 111.542  30.263  1.00 63.29           C  
ATOM   1034  CD1 PHE A 134     -18.713 111.831  30.548  1.00 63.74           C  
ATOM   1035  CD2 PHE A 134     -17.089 110.344  29.625  1.00 64.07           C  
ATOM   1036  CE1 PHE A 134     -19.724 110.949  30.200  1.00 62.53           C  
ATOM   1037  CE2 PHE A 134     -18.098 109.460  29.267  1.00 63.48           C  
ATOM   1038  CZ  PHE A 134     -19.417 109.763  29.557  1.00 62.74           C  
ATOM   1039  N   HIS A 135     -15.643 115.691  30.353  1.00 68.31           N  
ATOM   1040  CA  HIS A 135     -15.105 116.709  31.263  1.00 72.57           C  
ATOM   1041  C   HIS A 135     -15.391 116.194  32.684  1.00 73.68           C  
ATOM   1042  O   HIS A 135     -16.395 115.502  32.882  1.00 71.84           O  
ATOM   1043  CB  HIS A 135     -15.766 118.083  31.055  1.00 73.90           C  
ATOM   1044  CG  HIS A 135     -15.669 118.606  29.652  1.00 74.65           C  
ATOM   1045  ND1 HIS A 135     -16.779 118.914  28.893  1.00 72.27           N  
ATOM   1046  CD2 HIS A 135     -14.595 118.866  28.870  1.00 74.80           C  
ATOM   1047  CE1 HIS A 135     -16.394 119.345  27.705  1.00 71.54           C  
ATOM   1048  NE2 HIS A 135     -15.074 119.323  27.664  1.00 74.25           N  
ATOM   1049  N   PRO A 136     -14.537 116.534  33.679  1.00 75.34           N  
ATOM   1050  CA  PRO A 136     -14.763 116.042  35.060  1.00 74.86           C  
ATOM   1051  C   PRO A 136     -16.088 116.499  35.699  1.00 74.17           C  
ATOM   1052  O   PRO A 136     -16.616 115.834  36.593  1.00 70.83           O  
ATOM   1053  CB  PRO A 136     -13.565 116.606  35.845  1.00 74.38           C  
ATOM   1054  CG  PRO A 136     -12.568 117.016  34.817  1.00 75.62           C  
ATOM   1055  CD  PRO A 136     -13.358 117.418  33.611  1.00 75.81           C  
ATOM   1056  N   GLU A 137     -16.608 117.626  35.226  1.00 75.97           N  
ATOM   1057  CA  GLU A 137     -17.871 118.195  35.720  1.00 75.56           C  
ATOM   1058  C   GLU A 137     -19.072 117.343  35.313  1.00 72.28           C  
ATOM   1059  O   GLU A 137     -20.095 117.384  35.980  1.00 73.56           O  
ATOM   1060  CB  GLU A 137     -18.046 119.620  35.219  1.00 80.34           C  
ATOM   1061  CG  GLU A 137     -16.804 120.474  35.401  1.00 87.72           C  
ATOM   1062  CD  GLU A 137     -17.060 121.936  35.095  1.00 93.96           C  
ATOM   1063  OE1 GLU A 137     -16.577 122.352  34.042  1.00 98.05           O  
ATOM   1064  OE2 GLU A 137     -17.751 122.657  35.864  1.00 98.89           O1-
ATOM   1065  N   GLU A 138     -18.936 116.577  34.229  1.00 67.86           N  
ATOM   1066  CA  GLU A 138     -19.997 115.688  33.743  1.00 66.01           C  
ATOM   1067  C   GLU A 138     -20.113 114.349  34.482  1.00 68.32           C  
ATOM   1068  O   GLU A 138     -21.090 113.627  34.278  1.00 71.20           O  
ATOM   1069  CB  GLU A 138     -19.787 115.388  32.264  1.00 64.46           C  
ATOM   1070  CG  GLU A 138     -19.809 116.612  31.373  1.00 64.81           C  
ATOM   1071  CD  GLU A 138     -19.581 116.255  29.921  1.00 66.16           C  
ATOM   1072  OE1 GLU A 138     -18.535 115.646  29.612  1.00 65.35           O  
ATOM   1073  OE2 GLU A 138     -20.440 116.595  29.080  1.00 69.43           O1-
ATOM   1074  N   LEU A 139     -19.128 114.005  35.314  1.00 68.54           N  
ATOM   1075  CA  LEU A 139     -19.139 112.742  36.058  1.00 67.53           C  
ATOM   1076  C   LEU A 139     -19.767 112.956  37.434  1.00 68.98           C  
ATOM   1077  O   LEU A 139     -19.191 113.631  38.288  1.00 71.77           O  
ATOM   1078  CB  LEU A 139     -17.721 112.180  36.192  1.00 65.28           C  
ATOM   1079  CG  LEU A 139     -16.954 111.976  34.884  1.00 64.31           C  
ATOM   1080  CD1 LEU A 139     -15.539 111.517  35.186  1.00 64.41           C  
ATOM   1081  CD2 LEU A 139     -17.650 110.986  33.960  1.00 64.55           C  
ATOM   1082  N   VAL A 140     -20.943 112.364  37.643  1.00 71.55           N  
ATOM   1083  CA  VAL A 140     -21.750 112.617  38.839  1.00 72.42           C  
ATOM   1084  C   VAL A 140     -21.364 111.661  39.978  1.00 72.97           C  
ATOM   1085  O   VAL A 140     -21.216 110.457  39.755  1.00 74.36           O  
ATOM   1086  CB  VAL A 140     -23.271 112.510  38.547  1.00 71.85           C  
ATOM   1087  CG1 VAL A 140     -24.070 112.996  39.747  1.00 73.40           C  
ATOM   1088  CG2 VAL A 140     -23.662 113.325  37.314  1.00 72.26           C  
ATOM   1089  N   ASP A 141     -21.237 112.217  41.189  1.00 76.07           N  
ATOM   1090  CA  ASP A 141     -20.884 111.458  42.425  1.00 79.10           C  
ATOM   1091  C   ASP A 141     -22.146 111.321  43.283  1.00 74.46           C  
ATOM   1092  O   ASP A 141     -22.832 112.309  43.558  1.00 74.86           O  
ATOM   1093  CB  ASP A 141     -19.650 112.081  43.158  1.00 84.07           C  
ATOM   1094  CG  ASP A 141     -18.353 111.760  42.439  1.00 88.68           C  
ATOM   1095  OD1 ASP A 141     -17.892 110.594  42.505  1.00 91.72           O  
ATOM   1096  OD2 ASP A 141     -17.810 112.662  41.788  1.00 91.18           O1-
ATOM   1097  N   TYR A 142     -22.511 110.081  43.599  1.00 72.79           N  
ATOM   1098  CA  TYR A 142     -23.620 109.797  44.520  1.00 71.11           C  
ATOM   1099  C   TYR A 142     -23.510 108.388  45.079  1.00 70.23           C  
ATOM   1100  O   TYR A 142     -22.762 107.560  44.559  1.00 67.91           O  
ATOM   1101  CB  TYR A 142     -24.995 109.988  43.849  1.00 69.90           C  
ATOM   1102  CG  TYR A 142     -25.263 109.059  42.680  1.00 67.88           C  
ATOM   1103  CD1 TYR A 142     -24.778 109.352  41.410  1.00 67.80           C  
ATOM   1104  CD2 TYR A 142     -26.008 107.892  42.841  1.00 67.59           C  
ATOM   1105  CE1 TYR A 142     -25.022 108.511  40.333  1.00 65.96           C  
ATOM   1106  CE2 TYR A 142     -26.252 107.040  41.771  1.00 67.38           C  
ATOM   1107  CZ  TYR A 142     -25.753 107.355  40.518  1.00 65.79           C  
ATOM   1108  OH  TYR A 142     -25.985 106.523  39.448  1.00 64.23           O  
ATOM   1109  N   THR A 143     -24.274 108.133  46.135  1.00 71.96           N  
ATOM   1110  CA  THR A 143     -24.285 106.845  46.819  1.00 72.71           C  
ATOM   1111  C   THR A 143     -25.517 106.056  46.385  1.00 76.88           C  
ATOM   1112  O   THR A 143     -26.639 106.552  46.483  1.00 77.57           O  
ATOM   1113  CB  THR A 143     -24.332 107.053  48.348  1.00 70.87           C  
ATOM   1114  OG1 THR A 143     -23.290 107.956  48.744  1.00 70.08           O  
ATOM   1115  CG2 THR A 143     -24.157 105.745  49.092  1.00 71.66           C  
ATOM   1116  N   SER A 144     -25.301 104.829  45.909  1.00 80.86           N  
ATOM   1117  CA  SER A 144     -26.399 103.905  45.608  1.00 79.05           C  
ATOM   1118  C   SER A 144     -27.090 103.504  46.915  1.00 81.29           C  
ATOM   1119  O   SER A 144     -26.421 103.173  47.904  1.00 81.41           O  
ATOM   1120  CB  SER A 144     -25.881 102.658  44.878  1.00 76.76           C  
ATOM   1121  OG  SER A 144     -26.909 101.703  44.681  1.00 72.95           O  
ATOM   1122  N   CYS A 145     -28.423 103.536  46.916  1.00 81.21           N  
ATOM   1123  CA  CYS A 145     -29.210 103.116  48.084  1.00 80.08           C  
ATOM   1124  C   CYS A 145     -29.054 101.619  48.385  1.00 81.29           C  
ATOM   1125  O   CYS A 145     -29.290 101.191  49.515  1.00 83.34           O  
ATOM   1126  CB  CYS A 145     -30.689 103.463  47.897  1.00 80.37           C  
ATOM   1127  SG  CYS A 145     -31.562 102.462  46.668  1.00 82.57           S  
ATOM   1128  N   ALA A 146     -28.663 100.837  47.373  1.00 80.93           N  
ATOM   1129  CA  ALA A 146     -28.369  99.413  47.528  1.00 80.83           C  
ATOM   1130  C   ALA A 146     -26.883  99.101  47.802  1.00 82.66           C  
ATOM   1131  O   ALA A 146     -26.496  97.934  47.748  1.00 80.79           O  
ATOM   1132  CB  ALA A 146     -28.842  98.662  46.289  1.00 79.21           C  
ATOM   1133  N   GLN A 147     -26.065 100.111  48.126  1.00 85.36           N  
ATOM   1134  CA  GLN A 147     -24.612  99.917  48.298  1.00 85.70           C  
ATOM   1135  C   GLN A 147     -24.251  98.914  49.396  1.00 84.62           C  
ATOM   1136  O   GLN A 147     -23.351  98.091  49.206  1.00 85.51           O  
ATOM   1137  CB  GLN A 147     -23.886 101.247  48.570  1.00 85.82           C  
ATOM   1138  CG  GLN A 147     -22.399 101.070  48.882  1.00 86.75           C  
ATOM   1139  CD  GLN A 147     -21.573 102.323  48.683  1.00 87.02           C  
ATOM   1140  OE1 GLN A 147     -22.036 103.424  48.940  1.00 87.71           O  
ATOM   1141  NE2 GLN A 147     -20.330 102.155  48.230  1.00 90.15           N  
ATOM   1142  N   ASN A 148     -24.943  98.984  50.531  1.00 83.52           N  
ATOM   1143  CA  ASN A 148     -24.692  98.058  51.647  1.00 84.64           C  
ATOM   1144  C   ASN A 148     -25.107  96.610  51.361  1.00 82.10           C  
ATOM   1145  O   ASN A 148     -24.662  95.697  52.061  1.00 78.66           O  
ATOM   1146  CB  ASN A 148     -25.386  98.549  52.921  1.00 86.07           C  
ATOM   1147  CG  ASN A 148     -24.805  99.856  53.440  1.00 86.70           C  
ATOM   1148  OD1 ASN A 148     -23.675 100.235  53.114  1.00 82.34           O  
ATOM   1149  ND2 ASN A 148     -25.577 100.547  54.270  1.00 89.88           N  
ATOM   1150  N   TRP A 149     -25.959  96.412  50.352  1.00 80.53           N  
ATOM   1151  CA  TRP A 149     -26.333  95.077  49.870  1.00 77.94           C  
ATOM   1152  C   TRP A 149     -25.544  94.604  48.639  1.00 76.71           C  
ATOM   1153  O   TRP A 149     -25.660  93.445  48.256  1.00 75.38           O  
ATOM   1154  CB  TRP A 149     -27.836  95.039  49.594  1.00 76.99           C  
ATOM   1155  CG  TRP A 149     -28.618  95.401  50.818  1.00 76.37           C  
ATOM   1156  CD1 TRP A 149     -29.263  96.576  51.061  1.00 73.66           C  
ATOM   1157  CD2 TRP A 149     -28.787  94.598  51.992  1.00 75.27           C  
ATOM   1158  NE1 TRP A 149     -29.847  96.548  52.303  1.00 73.48           N  
ATOM   1159  CE2 TRP A 149     -29.568  95.346  52.899  1.00 74.33           C  
ATOM   1160  CE3 TRP A 149     -28.359  93.314  52.364  1.00 74.24           C  
ATOM   1161  CZ2 TRP A 149     -29.941  94.850  54.157  1.00 74.91           C  
ATOM   1162  CZ3 TRP A 149     -28.727  92.822  53.616  1.00 75.26           C  
ATOM   1163  CH2 TRP A 149     -29.511  93.591  54.497  1.00 74.41           C  
ATOM   1164  N   ILE A 150     -24.755  95.494  48.029  1.00 74.75           N  
ATOM   1165  CA  ILE A 150     -23.805  95.136  46.967  1.00 72.80           C  
ATOM   1166  C   ILE A 150     -22.388  94.904  47.541  1.00 74.20           C  
ATOM   1167  O   ILE A 150     -21.667  94.038  47.034  1.00 79.00           O  
ATOM   1168  CB  ILE A 150     -23.788  96.209  45.846  1.00 73.48           C  
ATOM   1169  CG1 ILE A 150     -25.186  96.371  45.220  1.00 70.56           C  
ATOM   1170  CG2 ILE A 150     -22.792  95.846  44.743  1.00 73.68           C  
ATOM   1171  CD1 ILE A 150     -25.420  97.724  44.579  1.00 68.45           C  
ATOM   1172  N   TYR A 151     -22.001  95.650  48.590  1.00 74.07           N  
ATOM   1173  CA  TYR A 151     -20.679  95.512  49.259  1.00 71.10           C  
ATOM   1174  C   TYR A 151     -20.805  95.450  50.787  1.00 67.25           C  
ATOM   1175  O   TYR A 151     -19.844  95.123  51.494  1.00 62.70           O  
ATOM   1176  CB  TYR A 151     -19.762  96.687  48.899  1.00 70.61           C  
ATOM   1177  CG  TYR A 151     -19.657  96.992  47.412  1.00 69.76           C  
ATOM   1178  CD1 TYR A 151     -18.886  96.188  46.559  1.00 69.20           C  
ATOM   1179  CD2 TYR A 151     -20.325  98.087  46.855  1.00 67.56           C  
ATOM   1180  CE1 TYR A 151     -18.790  96.468  45.195  1.00 66.98           C  
ATOM   1181  CE2 TYR A 151     -20.236  98.373  45.495  1.00 66.61           C  
ATOM   1182  CZ  TYR A 151     -19.468  97.567  44.669  1.00 64.88           C  
ATOM   1183  OH  TYR A 151     -19.384  97.860  43.330  1.00 58.42           O  
TER    1184      TYR A 151                                                      
ATOM   1185  N   ASN B   3     -21.770  85.757   4.889  1.00 77.15           N  
ATOM   1186  CA  ASN B   3     -23.037  86.540   5.117  1.00 77.26           C  
ATOM   1187  C   ASN B   3     -24.292  85.906   4.509  1.00 76.52           C  
ATOM   1188  O   ASN B   3     -25.398  86.165   4.987  1.00 73.93           O  
ATOM   1189  CB  ASN B   3     -22.886  87.976   4.601  1.00 75.28           C  
ATOM   1190  CG  ASN B   3     -21.794  88.740   5.325  1.00 74.13           C  
ATOM   1191  OD1 ASN B   3     -20.913  88.143   5.948  1.00 73.70           O  
ATOM   1192  ND2 ASN B   3     -21.844  90.064   5.249  1.00 73.25           N  
ATOM   1193  N   CYS B   4     -24.113  85.104   3.455  1.00 78.69           N  
ATOM   1194  CA  CYS B   4     -25.194  84.327   2.833  1.00 79.65           C  
ATOM   1195  C   CYS B   4     -25.248  82.858   3.286  1.00 76.91           C  
ATOM   1196  O   CYS B   4     -25.995  82.071   2.693  1.00 78.49           O  
ATOM   1197  CB  CYS B   4     -25.075  84.391   1.301  1.00 81.09           C  
ATOM   1198  SG  CYS B   4     -25.282  86.054   0.630  1.00 85.89           S  
ATOM   1199  N   GLU B   5     -24.476  82.487   4.318  1.00 74.61           N  
ATOM   1200  CA  GLU B   5     -24.519  81.124   4.883  1.00 73.49           C  
ATOM   1201  C   GLU B   5     -25.863  80.897   5.559  1.00 72.31           C  
ATOM   1202  O   GLU B   5     -26.422  81.819   6.146  1.00 73.70           O  
ATOM   1203  CB  GLU B   5     -23.380  80.896   5.894  1.00 72.69           C  
ATOM   1204  CG  GLU B   5     -23.332  79.498   6.508  1.00 72.10           C  
ATOM   1205  CD  GLU B   5     -22.106  79.274   7.381  1.00 72.71           C  
ATOM   1206  OE1 GLU B   5     -22.260  79.151   8.615  1.00 75.12           O  
ATOM   1207  OE2 GLU B   5     -20.984  79.215   6.840  1.00 70.16           O1-
ATOM   1208  N   ARG B   6     -26.368  79.670   5.468  1.00 70.87           N  
ATOM   1209  CA  ARG B   6     -27.668  79.311   6.029  1.00 71.75           C  
ATOM   1210  C   ARG B   6     -27.547  78.063   6.900  1.00 68.54           C  
ATOM   1211  O   ARG B   6     -26.753  77.167   6.600  1.00 71.64           O  
ATOM   1212  CB  ARG B   6     -28.674  79.059   4.906  1.00 75.61           C  
ATOM   1213  CG  ARG B   6     -28.842  80.225   3.940  1.00 80.26           C  
ATOM   1214  CD  ARG B   6     -29.786  79.873   2.800  1.00 85.54           C  
ATOM   1215  NE  ARG B   6     -29.294  78.734   2.020  1.00 89.14           N  
ATOM   1216  CZ  ARG B   6     -29.978  78.102   1.063  1.00 91.02           C  
ATOM   1217  NH1 ARG B   6     -31.212  78.483   0.725  1.00 92.33           N1+
ATOM   1218  NH2 ARG B   6     -29.418  77.073   0.433  1.00 89.54           N  
ATOM   1219  N   THR B   7     -28.334  78.012   7.975  1.00 62.34           N  
ATOM   1220  CA  THR B   7     -28.396  76.837   8.861  1.00 59.10           C  
ATOM   1221  C   THR B   7     -29.847  76.376   9.010  1.00 56.10           C  
ATOM   1222  O   THR B   7     -30.775  77.120   8.708  1.00 56.62           O  
ATOM   1223  CB  THR B   7     -27.734  77.108  10.243  1.00 57.37           C  
ATOM   1224  OG1 THR B   7     -27.673  75.896  11.004  1.00 56.66           O  
ATOM   1225  CG2 THR B   7     -28.477  78.172  11.048  1.00 58.01           C  
ATOM   1226  N   PHE B   8     -30.034  75.136   9.442  1.00 53.96           N  
ATOM   1227  CA  PHE B   8     -31.362  74.614   9.728  1.00 53.93           C  
ATOM   1228  C   PHE B   8     -31.531  74.470  11.239  1.00 56.35           C  
ATOM   1229  O   PHE B   8     -30.840  73.665  11.876  1.00 56.83           O  
ATOM   1230  CB  PHE B   8     -31.582  73.272   9.031  1.00 52.15           C  
ATOM   1231  CG  PHE B   8     -32.841  72.575   9.456  1.00 50.56           C  
ATOM   1232  CD1 PHE B   8     -34.070  72.968   8.944  1.00 50.37           C  
ATOM   1233  CD2 PHE B   8     -32.801  71.534  10.378  1.00 50.80           C  
ATOM   1234  CE1 PHE B   8     -35.237  72.332   9.340  1.00 51.18           C  
ATOM   1235  CE2 PHE B   8     -33.963  70.892  10.775  1.00 51.60           C  
ATOM   1236  CZ  PHE B   8     -35.185  71.292  10.255  1.00 50.98           C  
ATOM   1237  N   ILE B   9     -32.450  75.257  11.798  1.00 56.84           N  
ATOM   1238  CA  ILE B   9     -32.821  75.165  13.208  1.00 56.22           C  
ATOM   1239  C   ILE B   9     -34.229  74.583  13.298  1.00 55.47           C  
ATOM   1240  O   ILE B   9     -35.087  74.895  12.476  1.00 55.42           O  
ATOM   1241  CB  ILE B   9     -32.786  76.544  13.905  1.00 56.90           C  
ATOM   1242  CG1 ILE B   9     -31.434  77.253  13.674  1.00 56.94           C  
ATOM   1243  CG2 ILE B   9     -33.084  76.403  15.397  1.00 56.47           C  
ATOM   1244  CD1 ILE B   9     -30.224  76.540  14.249  1.00 58.22           C  
ATOM   1245  N   ALA B  10     -34.457  73.742  14.302  1.00 55.85           N  
ATOM   1246  CA  ALA B  10     -35.745  73.079  14.491  1.00 56.77           C  
ATOM   1247  C   ALA B  10     -36.081  73.024  15.973  1.00 57.87           C  
ATOM   1248  O   ALA B  10     -35.281  72.512  16.754  1.00 61.27           O  
ATOM   1249  CB  ALA B  10     -35.701  71.672  13.913  1.00 56.08           C  
ATOM   1250  N   ILE B  11     -37.243  73.557  16.358  1.00 56.22           N  
ATOM   1251  CA  ILE B  11     -37.717  73.465  17.740  1.00 55.86           C  
ATOM   1252  C   ILE B  11     -38.471  72.149  17.838  1.00 54.80           C  
ATOM   1253  O   ILE B  11     -39.527  72.004  17.233  1.00 54.88           O  
ATOM   1254  CB  ILE B  11     -38.625  74.650  18.123  1.00 56.11           C  
ATOM   1255  CG1 ILE B  11     -37.885  75.979  17.919  1.00 56.15           C  
ATOM   1256  CG2 ILE B  11     -39.101  74.521  19.567  1.00 55.20           C  
ATOM   1257  CD1 ILE B  11     -38.811  77.167  17.765  1.00 57.19           C  
ATOM   1258  N   LYS B  12     -37.916  71.197  18.607  1.00 55.34           N  
ATOM   1259  CA  LYS B  12     -38.496  69.872  18.821  1.00 54.17           C  
ATOM   1260  C   LYS B  12     -39.881  69.958  19.468  1.00 53.17           C  
ATOM   1261  O   LYS B  12     -40.291  71.028  19.922  1.00 53.11           O  
ATOM   1262  CB  LYS B  12     -37.544  68.968  19.618  1.00 53.10           C  
ATOM   1263  CG  LYS B  12     -36.063  69.303  19.595  1.00 54.21           C  
ATOM   1264  CD  LYS B  12     -35.241  68.428  18.674  1.00 54.70           C  
ATOM   1265  CE  LYS B  12     -34.024  67.816  19.356  1.00 53.56           C  
ATOM   1266  NZ  LYS B  12     -33.075  67.269  18.354  1.00 54.19           N  
ATOM   1267  N   PRO B  13     -40.618  68.834  19.519  1.00 51.82           N  
ATOM   1268  CA  PRO B  13     -41.989  68.842  20.139  1.00 52.90           C  
ATOM   1269  C   PRO B  13     -42.132  69.329  21.602  1.00 52.99           C  
ATOM   1270  O   PRO B  13     -43.091  70.035  21.916  1.00 54.54           O  
ATOM   1271  CB  PRO B  13     -42.426  67.362  20.031  1.00 52.34           C  
ATOM   1272  CG  PRO B  13     -41.687  66.865  18.839  1.00 51.74           C  
ATOM   1273  CD  PRO B  13     -40.333  67.498  18.943  1.00 50.70           C  
ATOM   1274  N   ASP B  14     -41.222  68.907  22.474  1.00 53.17           N  
ATOM   1275  CA  ASP B  14     -41.158  69.416  23.847  1.00 52.44           C  
ATOM   1276  C   ASP B  14     -40.980  70.936  23.908  1.00 50.74           C  
ATOM   1277  O   ASP B  14     -41.562  71.591  24.776  1.00 49.83           O  
ATOM   1278  CB  ASP B  14     -40.043  68.726  24.652  1.00 54.49           C  
ATOM   1279  CG  ASP B  14     -38.688  68.766  23.956  1.00 56.04           C  
ATOM   1280  OD1 ASP B  14     -38.656  68.671  22.711  1.00 56.18           O  
ATOM   1281  OD2 ASP B  14     -37.659  68.881  24.653  1.00 56.30           O1-
ATOM   1282  N   GLY B  15     -40.178  71.486  22.993  1.00 49.42           N  
ATOM   1283  CA  GLY B  15     -39.992  72.937  22.881  1.00 48.60           C  
ATOM   1284  C   GLY B  15     -41.278  73.673  22.539  1.00 47.46           C  
ATOM   1285  O   GLY B  15     -41.567  74.724  23.112  1.00 47.92           O  
ATOM   1286  N   VAL B  16     -42.057  73.102  21.622  1.00 46.65           N  
ATOM   1287  CA  VAL B  16     -43.354  73.655  21.237  1.00 47.74           C  
ATOM   1288  C   VAL B  16     -44.350  73.518  22.387  1.00 49.24           C  
ATOM   1289  O   VAL B  16     -45.030  74.483  22.741  1.00 51.63           O  
ATOM   1290  CB  VAL B  16     -43.913  72.970  19.965  1.00 47.26           C  
ATOM   1291  CG1 VAL B  16     -45.320  73.462  19.634  1.00 47.57           C  
ATOM   1292  CG2 VAL B  16     -42.996  73.230  18.779  1.00 46.75           C  
ATOM   1293  N   GLN B  17     -44.438  72.314  22.944  1.00 51.72           N  
ATOM   1294  CA  GLN B  17     -45.333  72.012  24.073  1.00 54.06           C  
ATOM   1295  C   GLN B  17     -45.103  72.875  25.312  1.00 53.62           C  
ATOM   1296  O   GLN B  17     -46.060  73.219  26.009  1.00 53.55           O  
ATOM   1297  CB  GLN B  17     -45.217  70.530  24.459  1.00 55.60           C  
ATOM   1298  CG  GLN B  17     -45.951  69.597  23.504  1.00 56.52           C  
ATOM   1299  CD  GLN B  17     -47.452  69.535  23.748  1.00 57.30           C  
ATOM   1300  OE1 GLN B  17     -47.957  69.992  24.777  1.00 55.76           O  
ATOM   1301  NE2 GLN B  17     -48.175  68.964  22.791  1.00 59.14           N  
ATOM   1302  N   ARG B  18     -43.845  73.213  25.581  1.00 53.73           N  
ATOM   1303  CA  ARG B  18     -43.483  73.993  26.772  1.00 56.19           C  
ATOM   1304  C   ARG B  18     -43.495  75.518  26.565  1.00 56.98           C  
ATOM   1305  O   ARG B  18     -43.309  76.287  27.523  1.00 58.27           O  
ATOM   1306  CB  ARG B  18     -42.132  73.516  27.310  1.00 55.81           C  
ATOM   1307  CG  ARG B  18     -42.196  72.108  27.892  1.00 55.08           C  
ATOM   1308  CD  ARG B  18     -40.826  71.626  28.311  1.00 56.39           C  
ATOM   1309  NE  ARG B  18     -40.224  72.549  29.276  1.00 57.42           N  
ATOM   1310  CZ  ARG B  18     -38.919  72.799  29.408  1.00 59.24           C  
ATOM   1311  NH1 ARG B  18     -38.004  72.205  28.637  1.00 61.41           N1+
ATOM   1312  NH2 ARG B  18     -38.515  73.669  30.327  1.00 58.63           N  
ATOM   1313  N   GLY B  19     -43.717  75.951  25.324  1.00 56.49           N  
ATOM   1314  CA  GLY B  19     -43.990  77.355  25.015  1.00 55.78           C  
ATOM   1315  C   GLY B  19     -42.752  78.197  24.799  1.00 52.60           C  
ATOM   1316  O   GLY B  19     -42.691  79.333  25.258  1.00 55.18           O  
ATOM   1317  N   LEU B  20     -41.787  77.658  24.065  1.00 49.90           N  
ATOM   1318  CA  LEU B  20     -40.491  78.309  23.878  1.00 49.82           C  
ATOM   1319  C   LEU B  20     -40.247  78.782  22.441  1.00 48.58           C  
ATOM   1320  O   LEU B  20     -39.138  79.207  22.117  1.00 45.62           O  
ATOM   1321  CB  LEU B  20     -39.385  77.339  24.297  1.00 50.93           C  
ATOM   1322  CG  LEU B  20     -39.478  76.798  25.727  1.00 51.56           C  
ATOM   1323  CD1 LEU B  20     -38.552  75.599  25.893  1.00 52.43           C  
ATOM   1324  CD2 LEU B  20     -39.156  77.886  26.741  1.00 50.85           C  
ATOM   1325  N   VAL B  21     -41.279  78.740  21.595  1.00 48.53           N  
ATOM   1326  CA  VAL B  21     -41.124  79.037  20.165  1.00 48.60           C  
ATOM   1327  C   VAL B  21     -40.708  80.488  19.982  1.00 48.15           C  
ATOM   1328  O   VAL B  21     -39.711  80.778  19.311  1.00 47.81           O  
ATOM   1329  CB  VAL B  21     -42.416  78.745  19.358  1.00 48.11           C  
ATOM   1330  CG1 VAL B  21     -42.274  79.167  17.897  1.00 47.53           C  
ATOM   1331  CG2 VAL B  21     -42.762  77.264  19.431  1.00 48.09           C  
ATOM   1332  N   GLY B  22     -41.481  81.384  20.587  1.00 49.51           N  
ATOM   1333  CA  GLY B  22     -41.192  82.813  20.555  1.00 51.84           C  
ATOM   1334  C   GLY B  22     -39.868  83.149  21.214  1.00 53.55           C  
ATOM   1335  O   GLY B  22     -39.072  83.922  20.676  1.00 54.80           O  
ATOM   1336  N   GLU B  23     -39.635  82.553  22.380  1.00 53.70           N  
ATOM   1337  CA  GLU B  23     -38.401  82.769  23.126  1.00 52.71           C  
ATOM   1338  C   GLU B  23     -37.164  82.393  22.306  1.00 50.71           C  
ATOM   1339  O   GLU B  23     -36.181  83.133  22.297  1.00 51.95           O  
ATOM   1340  CB  GLU B  23     -38.432  81.978  24.430  1.00 53.97           C  
ATOM   1341  CG  GLU B  23     -37.431  82.449  25.466  1.00 56.81           C  
ATOM   1342  CD  GLU B  23     -37.841  83.747  26.140  1.00 58.61           C  
ATOM   1343  OE1 GLU B  23     -37.256  84.800  25.796  1.00 61.38           O  
ATOM   1344  OE2 GLU B  23     -38.750  83.713  27.007  1.00 57.17           O1-
ATOM   1345  N   ILE B  24     -37.229  81.254  21.623  1.00 47.64           N  
ATOM   1346  CA  ILE B  24     -36.120  80.768  20.792  1.00 46.16           C  
ATOM   1347  C   ILE B  24     -35.912  81.650  19.570  1.00 46.36           C  
ATOM   1348  O   ILE B  24     -34.784  82.058  19.288  1.00 46.45           O  
ATOM   1349  CB  ILE B  24     -36.331  79.287  20.383  1.00 46.10           C  
ATOM   1350  CG1 ILE B  24     -36.055  78.381  21.599  1.00 46.51           C  
ATOM   1351  CG2 ILE B  24     -35.434  78.875  19.215  1.00 44.82           C  
ATOM   1352  CD1 ILE B  24     -36.664  76.997  21.513  1.00 46.73           C  
ATOM   1353  N   ILE B  25     -36.994  81.929  18.846  1.00 45.82           N  
ATOM   1354  CA  ILE B  25     -36.939  82.794  17.656  1.00 46.18           C  
ATOM   1355  C   ILE B  25     -36.371  84.174  17.996  1.00 48.08           C  
ATOM   1356  O   ILE B  25     -35.582  84.733  17.230  1.00 47.42           O  
ATOM   1357  CB  ILE B  25     -38.329  82.925  16.984  1.00 45.27           C  
ATOM   1358  CG1 ILE B  25     -38.680  81.620  16.265  1.00 44.26           C  
ATOM   1359  CG2 ILE B  25     -38.362  84.074  15.975  1.00 46.17           C  
ATOM   1360  CD1 ILE B  25     -40.143  81.465  15.911  1.00 43.99           C  
ATOM   1361  N   LYS B  26     -36.791  84.709  19.141  1.00 51.01           N  
ATOM   1362  CA  LYS B  26     -36.333  86.012  19.639  1.00 51.93           C  
ATOM   1363  C   LYS B  26     -34.816  86.095  19.725  1.00 50.81           C  
ATOM   1364  O   LYS B  26     -34.238  87.118  19.368  1.00 53.56           O  
ATOM   1365  CB  LYS B  26     -36.967  86.287  21.011  1.00 54.44           C  
ATOM   1366  CG  LYS B  26     -36.583  87.595  21.690  1.00 55.20           C  
ATOM   1367  CD  LYS B  26     -37.642  87.963  22.719  1.00 56.22           C  
ATOM   1368  CE  LYS B  26     -37.234  89.130  23.596  1.00 56.87           C  
ATOM   1369  NZ  LYS B  26     -36.357  88.692  24.708  1.00 57.29           N1+
ATOM   1370  N   ARG B  27     -34.179  85.013  20.170  1.00 48.94           N  
ATOM   1371  CA  ARG B  27     -32.717  84.977  20.326  1.00 47.35           C  
ATOM   1372  C   ARG B  27     -31.962  85.082  19.013  1.00 46.57           C  
ATOM   1373  O   ARG B  27     -30.949  85.763  18.947  1.00 47.18           O  
ATOM   1374  CB  ARG B  27     -32.281  83.716  21.066  1.00 48.19           C  
ATOM   1375  CG  ARG B  27     -32.839  83.648  22.473  1.00 47.80           C  
ATOM   1376  CD  ARG B  27     -31.996  82.797  23.391  1.00 48.69           C  
ATOM   1377  NE  ARG B  27     -32.512  82.854  24.752  1.00 49.93           N  
ATOM   1378  CZ  ARG B  27     -31.968  82.240  25.799  1.00 49.45           C  
ATOM   1379  NH1 ARG B  27     -30.873  81.497  25.662  1.00 49.99           N1+
ATOM   1380  NH2 ARG B  27     -32.532  82.372  26.993  1.00 50.49           N  
ATOM   1381  N   PHE B  28     -32.457  84.407  17.980  1.00 47.79           N  
ATOM   1382  CA  PHE B  28     -31.899  84.529  16.629  1.00 47.55           C  
ATOM   1383  C   PHE B  28     -32.140  85.908  16.023  1.00 47.08           C  
ATOM   1384  O   PHE B  28     -31.263  86.443  15.341  1.00 50.43           O  
ATOM   1385  CB  PHE B  28     -32.444  83.433  15.703  1.00 48.62           C  
ATOM   1386  CG  PHE B  28     -31.857  82.073  15.972  1.00 49.42           C  
ATOM   1387  CD1 PHE B  28     -32.463  81.202  16.877  1.00 50.30           C  
ATOM   1388  CD2 PHE B  28     -30.686  81.664  15.335  1.00 48.34           C  
ATOM   1389  CE1 PHE B  28     -31.918  79.948  17.133  1.00 49.43           C  
ATOM   1390  CE2 PHE B  28     -30.135  80.416  15.590  1.00 47.19           C  
ATOM   1391  CZ  PHE B  28     -30.751  79.558  16.490  1.00 48.02           C  
ATOM   1392  N   GLU B  29     -33.314  86.483  16.273  1.00 46.88           N  
ATOM   1393  CA  GLU B  29     -33.636  87.826  15.778  1.00 47.55           C  
ATOM   1394  C   GLU B  29     -32.737  88.883  16.403  1.00 48.02           C  
ATOM   1395  O   GLU B  29     -32.077  89.633  15.689  1.00 46.40           O  
ATOM   1396  CB  GLU B  29     -35.107  88.178  16.025  1.00 47.52           C  
ATOM   1397  CG  GLU B  29     -36.066  87.485  15.075  1.00 48.04           C  
ATOM   1398  CD  GLU B  29     -37.503  87.908  15.285  1.00 49.15           C  
ATOM   1399  OE1 GLU B  29     -38.032  87.664  16.393  1.00 50.08           O  
ATOM   1400  OE2 GLU B  29     -38.110  88.474  14.344  1.00 47.97           O1-
ATOM   1401  N   GLN B  30     -32.700  88.924  17.734  1.00 49.90           N  
ATOM   1402  CA  GLN B  30     -31.905  89.934  18.453  1.00 51.51           C  
ATOM   1403  C   GLN B  30     -30.400  89.784  18.243  1.00 51.48           C  
ATOM   1404  O   GLN B  30     -29.662  90.755  18.366  1.00 50.77           O  
ATOM   1405  CB  GLN B  30     -32.247  89.958  19.952  1.00 51.76           C  
ATOM   1406  CG  GLN B  30     -31.788  88.765  20.808  1.00 52.96           C  
ATOM   1407  CD  GLN B  30     -32.498  88.780  22.225  1.00 54.74           C  
ATOM   1408  OE1 GLN B  30     -32.691  87.758  22.974  1.00 55.32           O  
ATOM   1409  NE2 GLN B  30     -32.870  89.980  22.619  1.00 55.18           N  
ATOM   1410  N   LYS B  31     -29.956  88.568  17.938  1.00 52.20           N  
ATOM   1411  CA  LYS B  31     -28.561  88.305  17.578  1.00 52.38           C  
ATOM   1412  C   LYS B  31     -28.146  89.019  16.291  1.00 51.58           C  
ATOM   1413  O   LYS B  31     -27.007  89.481  16.189  1.00 50.25           O  
ATOM   1414  CB  LYS B  31     -28.338  86.790  17.454  1.00 53.24           C  
ATOM   1415  CG  LYS B  31     -26.958  86.351  16.991  1.00 53.16           C  
ATOM   1416  CD  LYS B  31     -25.875  86.758  17.964  1.00 51.94           C  
ATOM   1417  CE  LYS B  31     -24.571  86.089  17.594  1.00 50.76           C  
ATOM   1418  NZ  LYS B  31     -23.531  86.350  18.618  1.00 50.38           N1+
ATOM   1419  N   GLY B  32     -29.069  89.101  15.329  1.00 51.19           N  
ATOM   1420  CA  GLY B  32     -28.827  89.754  14.037  1.00 50.18           C  
ATOM   1421  C   GLY B  32     -29.089  88.893  12.811  1.00 50.05           C  
ATOM   1422  O   GLY B  32     -29.075  89.405  11.691  1.00 50.88           O  
ATOM   1423  N   PHE B  33     -29.308  87.592  13.003  1.00 49.96           N  
ATOM   1424  CA  PHE B  33     -29.526  86.670  11.886  1.00 51.07           C  
ATOM   1425  C   PHE B  33     -30.879  86.900  11.232  1.00 51.60           C  
ATOM   1426  O   PHE B  33     -31.809  87.369  11.880  1.00 53.80           O  
ATOM   1427  CB  PHE B  33     -29.415  85.210  12.348  1.00 50.71           C  
ATOM   1428  CG  PHE B  33     -28.037  84.827  12.834  1.00 50.69           C  
ATOM   1429  CD1 PHE B  33     -26.929  84.970  11.998  1.00 50.37           C  
ATOM   1430  CD2 PHE B  33     -27.841  84.311  14.115  1.00 48.81           C  
ATOM   1431  CE1 PHE B  33     -25.661  84.610  12.430  1.00 49.73           C  
ATOM   1432  CE2 PHE B  33     -26.573  83.949  14.547  1.00 47.55           C  
ATOM   1433  CZ  PHE B  33     -25.483  84.101  13.707  1.00 47.97           C  
ATOM   1434  N   ARG B  34     -30.965  86.563   9.947  1.00 51.75           N  
ATOM   1435  CA  ARG B  34     -32.144  86.821   9.126  1.00 52.79           C  
ATOM   1436  C   ARG B  34     -32.982  85.556   8.999  1.00 50.82           C  
ATOM   1437  O   ARG B  34     -32.459  84.514   8.624  1.00 51.54           O  
ATOM   1438  CB  ARG B  34     -31.708  87.294   7.736  1.00 55.16           C  
ATOM   1439  CG  ARG B  34     -32.854  87.698   6.822  1.00 56.67           C  
ATOM   1440  CD  ARG B  34     -32.360  88.289   5.510  1.00 60.41           C  
ATOM   1441  NE  ARG B  34     -31.874  87.293   4.545  1.00 63.48           N  
ATOM   1442  CZ  ARG B  34     -32.636  86.448   3.834  1.00 68.48           C  
ATOM   1443  NH1 ARG B  34     -32.066  85.599   2.981  1.00 70.98           N1+
ATOM   1444  NH2 ARG B  34     -33.963  86.416   3.966  1.00 69.15           N  
ATOM   1445  N   LEU B  35     -34.276  85.651   9.302  1.00 49.35           N  
ATOM   1446  CA  LEU B  35     -35.181  84.519   9.128  1.00 49.70           C  
ATOM   1447  C   LEU B  35     -35.453  84.318   7.640  1.00 50.23           C  
ATOM   1448  O   LEU B  35     -35.948  85.223   6.969  1.00 51.87           O  
ATOM   1449  CB  LEU B  35     -36.499  84.735   9.880  1.00 49.53           C  
ATOM   1450  CG  LEU B  35     -37.537  83.607   9.792  1.00 50.51           C  
ATOM   1451  CD1 LEU B  35     -37.033  82.318  10.426  1.00 50.03           C  
ATOM   1452  CD2 LEU B  35     -38.845  84.040  10.436  1.00 51.57           C  
ATOM   1453  N   VAL B  36     -35.130  83.127   7.146  1.00 50.59           N  
ATOM   1454  CA  VAL B  36     -35.261  82.784   5.729  1.00 51.28           C  
ATOM   1455  C   VAL B  36     -36.459  81.870   5.484  1.00 51.34           C  
ATOM   1456  O   VAL B  36     -37.182  82.041   4.506  1.00 52.22           O  
ATOM   1457  CB  VAL B  36     -33.974  82.098   5.212  1.00 52.09           C  
ATOM   1458  CG1 VAL B  36     -34.096  81.696   3.763  1.00 52.03           C  
ATOM   1459  CG2 VAL B  36     -32.775  83.009   5.420  1.00 54.42           C  
ATOM   1460  N   GLY B  37     -36.635  80.877   6.349  1.00 52.52           N  
ATOM   1461  CA  GLY B  37     -37.747  79.937   6.253  1.00 54.83           C  
ATOM   1462  C   GLY B  37     -38.303  79.600   7.622  1.00 56.08           C  
ATOM   1463  O   GLY B  37     -37.573  79.611   8.619  1.00 56.81           O  
ATOM   1464  N   LEU B  38     -39.593  79.286   7.660  1.00 56.63           N  
ATOM   1465  CA  LEU B  38     -40.285  78.976   8.906  1.00 59.37           C  
ATOM   1466  C   LEU B  38     -41.570  78.232   8.597  1.00 59.20           C  
ATOM   1467  O   LEU B  38     -42.361  78.689   7.781  1.00 62.22           O  
ATOM   1468  CB  LEU B  38     -40.599  80.263   9.672  1.00 59.73           C  
ATOM   1469  CG  LEU B  38     -41.455  80.194  10.940  1.00 61.09           C  
ATOM   1470  CD1 LEU B  38     -40.734  79.415  12.022  1.00 61.56           C  
ATOM   1471  CD2 LEU B  38     -41.781  81.592  11.440  1.00 61.42           C  
ATOM   1472  N   LYS B  39     -41.771  77.090   9.240  1.00 58.94           N  
ATOM   1473  CA  LYS B  39     -42.995  76.318   9.057  1.00 61.04           C  
ATOM   1474  C   LYS B  39     -43.237  75.374  10.228  1.00 60.92           C  
ATOM   1475  O   LYS B  39     -42.309  74.991  10.937  1.00 62.15           O  
ATOM   1476  CB  LYS B  39     -42.963  75.538   7.739  1.00 62.88           C  
ATOM   1477  CG  LYS B  39     -41.704  74.706   7.557  1.00 66.03           C  
ATOM   1478  CD  LYS B  39     -41.928  73.449   6.735  1.00 66.62           C  
ATOM   1479  CE  LYS B  39     -42.082  73.749   5.257  1.00 67.07           C  
ATOM   1480  NZ  LYS B  39     -42.104  72.474   4.492  1.00 68.25           N1+
ATOM   1481  N   PHE B  40     -44.499  75.000  10.393  1.00 62.35           N  
ATOM   1482  CA  PHE B  40     -44.977  74.234  11.535  1.00 63.21           C  
ATOM   1483  C   PHE B  40     -45.610  72.965  10.981  1.00 66.62           C  
ATOM   1484  O   PHE B  40     -46.584  73.030  10.234  1.00 67.24           O  
ATOM   1485  CB  PHE B  40     -45.991  75.083  12.289  1.00 61.67           C  
ATOM   1486  CG  PHE B  40     -46.435  74.516  13.603  1.00 60.99           C  
ATOM   1487  CD1 PHE B  40     -45.513  74.257  14.606  1.00 61.73           C  
ATOM   1488  CD2 PHE B  40     -47.785  74.301  13.863  1.00 58.41           C  
ATOM   1489  CE1 PHE B  40     -45.923  73.756  15.832  1.00 60.90           C  
ATOM   1490  CE2 PHE B  40     -48.201  73.799  15.085  1.00 57.67           C  
ATOM   1491  CZ  PHE B  40     -47.270  73.528  16.073  1.00 58.37           C  
ATOM   1492  N   MET B  41     -45.037  71.818  11.332  1.00 69.82           N  
ATOM   1493  CA  MET B  41     -45.383  70.552  10.695  1.00 70.31           C  
ATOM   1494  C   MET B  41     -45.148  69.379  11.628  1.00 71.18           C  
ATOM   1495  O   MET B  41     -44.232  69.413  12.449  1.00 71.18           O  
ATOM   1496  CB  MET B  41     -44.536  70.361   9.434  1.00 70.79           C  
ATOM   1497  CG  MET B  41     -43.029  70.453   9.657  1.00 71.67           C  
ATOM   1498  SD  MET B  41     -42.075  70.255   8.143  1.00 74.16           S  
ATOM   1499  CE  MET B  41     -42.327  68.509   7.814  1.00 77.07           C  
ATOM   1500  N   GLN B  42     -45.980  68.350  11.498  1.00 71.10           N  
ATOM   1501  CA  GLN B  42     -45.691  67.074  12.116  1.00 72.03           C  
ATOM   1502  C   GLN B  42     -44.834  66.293  11.135  1.00 70.95           C  
ATOM   1503  O   GLN B  42     -45.280  65.980  10.036  1.00 72.96           O  
ATOM   1504  CB  GLN B  42     -46.965  66.313  12.453  1.00 73.85           C  
ATOM   1505  CG  GLN B  42     -46.683  65.007  13.192  1.00 78.49           C  
ATOM   1506  CD  GLN B  42     -47.689  64.684  14.285  1.00 81.43           C  
ATOM   1507  OE1 GLN B  42     -48.289  65.579  14.883  1.00 81.38           O  
ATOM   1508  NE2 GLN B  42     -47.867  63.392  14.560  1.00 82.56           N  
ATOM   1509  N   ALA B  43     -43.602  65.997  11.536  1.00 71.86           N  
ATOM   1510  CA  ALA B  43     -42.644  65.290  10.689  1.00 73.22           C  
ATOM   1511  C   ALA B  43     -42.961  63.800  10.632  1.00 72.24           C  
ATOM   1512  O   ALA B  43     -43.264  63.189  11.660  1.00 73.79           O  
ATOM   1513  CB  ALA B  43     -41.228  65.494  11.209  1.00 73.94           C  
ATOM   1514  N   SER B  44     -42.887  63.232   9.427  1.00 70.94           N  
ATOM   1515  CA  SER B  44     -43.043  61.793   9.215  1.00 69.13           C  
ATOM   1516  C   SER B  44     -41.775  61.065   9.644  1.00 71.85           C  
ATOM   1517  O   SER B  44     -40.697  61.660   9.688  1.00 74.01           O  
ATOM   1518  CB  SER B  44     -43.315  61.500   7.742  1.00 66.80           C  
ATOM   1519  OG  SER B  44     -42.208  61.879   6.942  1.00 63.47           O  
ATOM   1520  N   GLU B  45     -41.909  59.778   9.945  1.00 74.01           N  
ATOM   1521  CA  GLU B  45     -40.769  58.953  10.374  1.00 76.28           C  
ATOM   1522  C   GLU B  45     -39.689  58.780   9.302  1.00 77.15           C  
ATOM   1523  O   GLU B  45     -38.510  58.668   9.631  1.00 73.99           O  
ATOM   1524  CB  GLU B  45     -41.250  57.583  10.841  1.00 77.63           C  
ATOM   1525  CG  GLU B  45     -42.015  57.633  12.150  1.00 81.12           C  
ATOM   1526  CD  GLU B  45     -43.047  56.532  12.251  1.00 84.21           C  
ATOM   1527  OE1 GLU B  45     -44.092  56.640  11.575  1.00 79.02           O  
ATOM   1528  OE2 GLU B  45     -42.812  55.564  13.007  1.00 91.77           O1-
ATOM   1529  N   ASP B  46     -40.092  58.752   8.032  1.00 81.95           N  
ATOM   1530  CA  ASP B  46     -39.137  58.676   6.920  1.00 84.89           C  
ATOM   1531  C   ASP B  46     -38.288  59.937   6.813  1.00 81.60           C  
ATOM   1532  O   ASP B  46     -37.098  59.852   6.517  1.00 81.07           O  
ATOM   1533  CB  ASP B  46     -39.853  58.403   5.593  1.00 91.78           C  
ATOM   1534  CG  ASP B  46     -40.403  56.980   5.504  1.00 98.08           C  
ATOM   1535  OD1 ASP B  46     -40.605  56.321   6.541  1.00101.37           O  
ATOM   1536  OD2 ASP B  46     -40.660  56.519   4.379  1.00105.18           O1-
ATOM   1537  N   LEU B  47     -38.902  61.095   7.056  1.00 79.86           N  
ATOM   1538  CA  LEU B  47     -38.171  62.364   7.122  1.00 79.94           C  
ATOM   1539  C   LEU B  47     -37.175  62.378   8.288  1.00 76.00           C  
ATOM   1540  O   LEU B  47     -36.020  62.768   8.115  1.00 75.68           O  
ATOM   1541  CB  LEU B  47     -39.144  63.547   7.255  1.00 82.36           C  
ATOM   1542  CG  LEU B  47     -38.552  64.966   7.254  1.00 85.30           C  
ATOM   1543  CD1 LEU B  47     -38.006  65.331   5.884  1.00 84.21           C  
ATOM   1544  CD2 LEU B  47     -39.595  65.985   7.685  1.00 87.91           C  
ATOM   1545  N   LEU B  48     -37.635  61.962   9.467  1.00 71.39           N  
ATOM   1546  CA  LEU B  48     -36.800  61.953  10.673  1.00 69.78           C  
ATOM   1547  C   LEU B  48     -35.644  60.958  10.583  1.00 69.77           C  
ATOM   1548  O   LEU B  48     -34.531  61.260  11.023  1.00 70.31           O  
ATOM   1549  CB  LEU B  48     -37.650  61.663  11.916  1.00 69.53           C  
ATOM   1550  CG  LEU B  48     -38.671  62.746  12.288  1.00 70.73           C  
ATOM   1551  CD1 LEU B  48     -39.688  62.219  13.289  1.00 70.24           C  
ATOM   1552  CD2 LEU B  48     -37.980  63.989  12.834  1.00 69.37           C  
ATOM   1553  N   LYS B  49     -35.915  59.782  10.016  1.00 68.68           N  
ATOM   1554  CA  LYS B  49     -34.886  58.753   9.809  1.00 67.94           C  
ATOM   1555  C   LYS B  49     -33.784  59.197   8.837  1.00 66.82           C  
ATOM   1556  O   LYS B  49     -32.614  58.868   9.051  1.00 66.06           O  
ATOM   1557  CB  LYS B  49     -35.515  57.432   9.350  1.00 69.67           C  
ATOM   1558  CG  LYS B  49     -36.167  56.659  10.485  1.00 71.08           C  
ATOM   1559  CD  LYS B  49     -36.947  55.452   9.996  1.00 73.75           C  
ATOM   1560  CE  LYS B  49     -37.523  54.681  11.176  1.00 77.14           C  
ATOM   1561  NZ  LYS B  49     -38.341  53.513  10.749  1.00 76.34           N1+
ATOM   1562  N   GLU B  50     -34.163  59.934   7.788  1.00 66.24           N  
ATOM   1563  CA AGLU B  50     -33.187  60.501   6.848  0.50 66.78           C  
ATOM   1564  CA BGLU B  50     -33.220  60.490   6.819  0.50 66.53           C  
ATOM   1565  C   GLU B  50     -32.397  61.630   7.487  1.00 67.32           C  
ATOM   1566  O   GLU B  50     -31.165  61.716   7.324  1.00 67.10           O  
ATOM   1567  CB AGLU B  50     -33.892  61.023   5.596  0.50 66.30           C  
ATOM   1568  CB BGLU B  50     -33.957  60.907   5.483  0.50 65.41           C  
ATOM   1569  CG AGLU B  50     -32.997  61.530   4.464  0.50 64.31           C  
ATOM   1570  CG BGLU B  50     -34.429  59.757   4.600  0.50 63.36           C  
ATOM   1571  CD AGLU B  50     -31.979  60.510   3.982  0.50 63.10           C  
ATOM   1572  CD BGLU B  50     -35.135  60.257   3.341  0.50 60.43           C  
ATOM   1573  OE1AGLU B  50     -30.922  60.915   3.450  0.50 61.29           O  
ATOM   1574  OE1BGLU B  50     -34.435  60.530   2.344  0.50 58.52           O  
ATOM   1575  OE2AGLU B  50     -32.243  59.299   4.117  0.50 63.55           O1-
ATOM   1576  OE2BGLU B  50     -36.381  60.383   3.341  0.50 55.94           O1-
ATOM   1577  N   HIS B  51     -33.088  62.478   8.249  1.00 68.36           N  
ATOM   1578  CA  HIS B  51     -32.472  63.609   8.965  1.00 69.30           C  
ATOM   1579  C   HIS B  51     -31.442  63.156  10.007  1.00 71.54           C  
ATOM   1580  O   HIS B  51     -30.332  63.697  10.056  1.00 70.32           O  
ATOM   1581  CB  HIS B  51     -33.564  64.470   9.623  1.00 67.63           C  
ATOM   1582  CG  HIS B  51     -33.042  65.560  10.506  1.00 64.75           C  
ATOM   1583  ND1 HIS B  51     -32.521  66.740  10.019  1.00 64.30           N  
ATOM   1584  CD2 HIS B  51     -32.986  65.654  11.852  1.00 63.46           C  
ATOM   1585  CE1 HIS B  51     -32.158  67.510  11.028  1.00 63.24           C  
ATOM   1586  NE2 HIS B  51     -32.429  66.873  12.152  1.00 65.23           N  
ATOM   1587  N   TYR B  52     -31.806  62.158  10.815  1.00 71.58           N  
ATOM   1588  CA  TYR B  52     -30.905  61.595  11.836  1.00 71.58           C  
ATOM   1589  C   TYR B  52     -30.193  60.308  11.362  1.00 71.43           C  
ATOM   1590  O   TYR B  52     -29.947  59.400  12.162  1.00 69.76           O  
ATOM   1591  CB  TYR B  52     -31.682  61.333  13.144  1.00 71.59           C  
ATOM   1592  CG  TYR B  52     -32.193  62.578  13.848  1.00 71.73           C  
ATOM   1593  CD1 TYR B  52     -31.311  63.570  14.284  1.00 70.70           C  
ATOM   1594  CD2 TYR B  52     -33.556  62.754  14.105  1.00 71.54           C  
ATOM   1595  CE1 TYR B  52     -31.772  64.707  14.932  1.00 70.12           C  
ATOM   1596  CE2 TYR B  52     -34.024  63.889  14.756  1.00 70.14           C  
ATOM   1597  CZ  TYR B  52     -33.129  64.859  15.169  1.00 70.17           C  
ATOM   1598  OH  TYR B  52     -33.591  65.985  15.805  1.00 74.15           O  
ATOM   1599  N   VAL B  53     -29.839  60.242  10.076  1.00 73.39           N  
ATOM   1600  CA  VAL B  53     -29.280  59.010   9.485  1.00 75.70           C  
ATOM   1601  C   VAL B  53     -27.901  58.621  10.050  1.00 75.51           C  
ATOM   1602  O   VAL B  53     -27.581  57.435  10.140  1.00 76.78           O  
ATOM   1603  CB  VAL B  53     -29.237  59.081   7.932  1.00 73.81           C  
ATOM   1604  CG1 VAL B  53     -28.143  60.022   7.426  1.00 72.13           C  
ATOM   1605  CG2 VAL B  53     -29.082  57.687   7.336  1.00 73.87           C  
ATOM   1606  N   ASP B  54     -27.098  59.611  10.435  1.00 74.17           N  
ATOM   1607  CA  ASP B  54     -25.803  59.339  11.073  1.00 72.79           C  
ATOM   1608  C   ASP B  54     -25.937  58.642  12.428  1.00 72.44           C  
ATOM   1609  O   ASP B  54     -25.001  57.981  12.861  1.00 72.98           O  
ATOM   1610  CB  ASP B  54     -24.986  60.621  11.240  1.00 73.57           C  
ATOM   1611  CG  ASP B  54     -24.480  61.141   9.942  1.00 75.10           C  
ATOM   1612  OD1 ASP B  54     -25.347  61.471   9.149  1.00 77.69           O  
ATOM   1613  OD2 ASP B  54     -23.246  61.204   9.702  1.00 76.21           O1-
ATOM   1614  N   LEU B  55     -27.087  58.799  13.084  1.00 69.74           N  
ATOM   1615  CA  LEU B  55     -27.376  58.142  14.360  1.00 69.60           C  
ATOM   1616  C   LEU B  55     -28.208  56.861  14.221  1.00 70.68           C  
ATOM   1617  O   LEU B  55     -28.666  56.324  15.221  1.00 65.53           O  
ATOM   1618  CB  LEU B  55     -28.120  59.118  15.275  1.00 70.45           C  
ATOM   1619  CG  LEU B  55     -27.508  60.509  15.439  1.00 70.03           C  
ATOM   1620  CD1 LEU B  55     -28.441  61.395  16.249  1.00 71.28           C  
ATOM   1621  CD2 LEU B  55     -26.144  60.424  16.101  1.00 69.53           C  
ATOM   1622  N   LYS B  56     -28.407  56.388  12.991  1.00 77.28           N  
ATOM   1623  CA  LYS B  56     -29.209  55.192  12.690  1.00 83.38           C  
ATOM   1624  C   LYS B  56     -29.007  53.974  13.611  1.00 82.03           C  
ATOM   1625  O   LYS B  56     -29.984  53.421  14.135  1.00 84.53           O  
ATOM   1626  CB  LYS B  56     -28.955  54.787  11.229  1.00 90.16           C  
ATOM   1627  CG  LYS B  56     -29.888  53.726  10.711  1.00 97.63           C  
ATOM   1628  CD  LYS B  56     -29.392  53.130   9.400  1.00101.28           C  
ATOM   1629  CE  LYS B  56     -30.513  52.469   8.637  1.00104.37           C  
ATOM   1630  NZ  LYS B  56     -29.996  51.668   7.500  1.00107.37           N1+
ATOM   1631  N   ASP B  57     -27.755  53.567  13.808  1.00 80.78           N  
ATOM   1632  CA  ASP B  57     -27.431  52.387  14.641  1.00 80.63           C  
ATOM   1633  C   ASP B  57     -26.885  52.780  16.034  1.00 73.44           C  
ATOM   1634  O   ASP B  57     -25.832  52.313  16.464  1.00 70.02           O  
ATOM   1635  CB  ASP B  57     -26.532  51.376  13.869  1.00 83.31           C  
ATOM   1636  CG  ASP B  57     -25.172  51.943  13.470  1.00 85.18           C  
ATOM   1637  OD1 ASP B  57     -24.339  51.154  12.976  1.00 83.02           O  
ATOM   1638  OD2 ASP B  57     -24.924  53.153  13.661  1.00 90.93           O1-
ATOM   1639  N   ARG B  58     -27.637  53.649  16.717  1.00 67.77           N  
ATOM   1640  CA  ARG B  58     -27.390  54.029  18.105  1.00 64.30           C  
ATOM   1641  C   ARG B  58     -28.524  53.468  18.956  1.00 62.97           C  
ATOM   1642  O   ARG B  58     -29.637  53.314  18.455  1.00 62.58           O  
ATOM   1643  CB  ARG B  58     -27.380  55.544  18.247  1.00 64.08           C  
ATOM   1644  CG  ARG B  58     -26.341  56.249  17.404  1.00 64.46           C  
ATOM   1645  CD  ARG B  58     -24.928  55.950  17.858  1.00 63.18           C  
ATOM   1646  NE  ARG B  58     -24.505  57.056  18.721  1.00 62.72           N  
ATOM   1647  CZ  ARG B  58     -23.791  58.130  18.375  1.00 66.23           C  
ATOM   1648  NH1 ARG B  58     -23.287  58.293  17.152  1.00 70.30           N1+
ATOM   1649  NH2 ARG B  58     -23.540  59.057  19.295  1.00 65.33           N  
ATOM   1650  N   PRO B  59     -28.258  53.171  20.245  1.00 62.99           N  
ATOM   1651  CA  PRO B  59     -29.290  52.554  21.097  1.00 65.02           C  
ATOM   1652  C   PRO B  59     -30.564  53.391  21.289  1.00 66.58           C  
ATOM   1653  O   PRO B  59     -31.645  52.827  21.476  1.00 68.49           O  
ATOM   1654  CB  PRO B  59     -28.563  52.327  22.438  1.00 65.00           C  
ATOM   1655  CG  PRO B  59     -27.358  53.201  22.399  1.00 63.80           C  
ATOM   1656  CD  PRO B  59     -26.974  53.316  20.958  1.00 64.09           C  
ATOM   1657  N   PHE B  60     -30.427  54.715  21.242  1.00 67.97           N  
ATOM   1658  CA  PHE B  60     -31.561  55.640  21.423  1.00 67.47           C  
ATOM   1659  C   PHE B  60     -32.362  55.940  20.149  1.00 68.78           C  
ATOM   1660  O   PHE B  60     -33.456  56.495  20.252  1.00 70.23           O  
ATOM   1661  CB  PHE B  60     -31.095  56.967  22.055  1.00 65.52           C  
ATOM   1662  CG  PHE B  60     -30.003  57.672  21.287  1.00 63.84           C  
ATOM   1663  CD1 PHE B  60     -30.284  58.365  20.111  1.00 63.05           C  
ATOM   1664  CD2 PHE B  60     -28.686  57.645  21.744  1.00 62.91           C  
ATOM   1665  CE1 PHE B  60     -29.277  59.011  19.408  1.00 62.31           C  
ATOM   1666  CE2 PHE B  60     -27.676  58.287  21.044  1.00 62.48           C  
ATOM   1667  CZ  PHE B  60     -27.973  58.975  19.874  1.00 62.62           C  
ATOM   1668  N   PHE B  61     -31.829  55.582  18.974  1.00 67.51           N  
ATOM   1669  CA  PHE B  61     -32.382  56.008  17.671  1.00 68.48           C  
ATOM   1670  C   PHE B  61     -33.879  55.749  17.468  1.00 67.88           C  
ATOM   1671  O   PHE B  61     -34.579  56.590  16.907  1.00 70.37           O  
ATOM   1672  CB  PHE B  61     -31.599  55.368  16.520  1.00 69.85           C  
ATOM   1673  CG  PHE B  61     -32.081  55.775  15.153  1.00 71.01           C  
ATOM   1674  CD1 PHE B  61     -31.757  57.023  14.629  1.00 74.65           C  
ATOM   1675  CD2 PHE B  61     -32.864  54.914  14.386  1.00 70.37           C  
ATOM   1676  CE1 PHE B  61     -32.203  57.401  13.366  1.00 75.86           C  
ATOM   1677  CE2 PHE B  61     -33.311  55.286  13.124  1.00 72.53           C  
ATOM   1678  CZ  PHE B  61     -32.980  56.533  12.612  1.00 74.16           C  
ATOM   1679  N   ALA B  62     -34.359  54.588  17.909  1.00 66.26           N  
ATOM   1680  CA  ALA B  62     -35.791  54.261  17.843  1.00 64.63           C  
ATOM   1681  C   ALA B  62     -36.622  55.259  18.648  1.00 63.04           C  
ATOM   1682  O   ALA B  62     -37.603  55.814  18.144  1.00 58.66           O  
ATOM   1683  CB  ALA B  62     -36.039  52.849  18.356  1.00 64.44           C  
ATOM   1684  N   GLY B  63     -36.209  55.473  19.897  1.00 63.01           N  
ATOM   1685  CA  GLY B  63     -36.875  56.401  20.804  1.00 62.75           C  
ATOM   1686  C   GLY B  63     -36.786  57.859  20.384  1.00 62.17           C  
ATOM   1687  O   GLY B  63     -37.709  58.631  20.653  1.00 61.38           O  
ATOM   1688  N   LEU B  64     -35.672  58.235  19.751  1.00 62.57           N  
ATOM   1689  CA  LEU B  64     -35.495  59.569  19.155  1.00 64.83           C  
ATOM   1690  C   LEU B  64     -36.535  59.835  18.068  1.00 66.26           C  
ATOM   1691  O   LEU B  64     -37.220  60.862  18.094  1.00 68.55           O  
ATOM   1692  CB  LEU B  64     -34.085  59.719  18.559  1.00 65.55           C  
ATOM   1693  CG  LEU B  64     -33.748  61.004  17.784  1.00 66.73           C  
ATOM   1694  CD1 LEU B  64     -33.831  62.231  18.685  1.00 68.55           C  
ATOM   1695  CD2 LEU B  64     -32.371  60.903  17.147  1.00 65.24           C  
ATOM   1696  N   VAL B  65     -36.641  58.901  17.125  1.00 64.60           N  
ATOM   1697  CA  VAL B  65     -37.601  58.996  16.019  1.00 62.64           C  
ATOM   1698  C   VAL B  65     -39.052  59.060  16.521  1.00 60.60           C  
ATOM   1699  O   VAL B  65     -39.882  59.756  15.937  1.00 56.66           O  
ATOM   1700  CB  VAL B  65     -37.397  57.839  15.006  1.00 64.55           C  
ATOM   1701  CG1 VAL B  65     -38.528  57.757  13.983  1.00 67.41           C  
ATOM   1702  CG2 VAL B  65     -36.073  58.018  14.275  1.00 64.60           C  
ATOM   1703  N   LYS B  66     -39.343  58.341  17.602  1.00 63.83           N  
ATOM   1704  CA  LYS B  66     -40.678  58.334  18.199  1.00 67.32           C  
ATOM   1705  C   LYS B  66     -41.006  59.684  18.841  1.00 69.03           C  
ATOM   1706  O   LYS B  66     -42.060  60.276  18.574  1.00 69.74           O  
ATOM   1707  CB  LYS B  66     -40.795  57.222  19.254  1.00 67.27           C  
ATOM   1708  CG  LYS B  66     -42.222  56.734  19.435  1.00 70.70           C  
ATOM   1709  CD  LYS B  66     -42.482  56.169  20.819  1.00 73.89           C  
ATOM   1710  CE  LYS B  66     -43.981  56.069  21.065  1.00 75.54           C  
ATOM   1711  NZ  LYS B  66     -44.297  55.336  22.319  1.00 77.51           N1+
ATOM   1712  N   TYR B  67     -40.091  60.139  19.695  1.00 70.05           N  
ATOM   1713  CA  TYR B  67     -40.160  61.449  20.372  1.00 70.18           C  
ATOM   1714  C   TYR B  67     -40.370  62.599  19.395  1.00 66.58           C  
ATOM   1715  O   TYR B  67     -41.217  63.457  19.623  1.00 62.66           O  
ATOM   1716  CB  TYR B  67     -38.885  61.646  21.220  1.00 71.56           C  
ATOM   1717  CG  TYR B  67     -38.365  63.061  21.444  1.00 69.73           C  
ATOM   1718  CD1 TYR B  67     -37.057  63.394  21.077  1.00 68.22           C  
ATOM   1719  CD2 TYR B  67     -39.142  64.043  22.064  1.00 68.52           C  
ATOM   1720  CE1 TYR B  67     -36.549  64.661  21.296  1.00 68.11           C  
ATOM   1721  CE2 TYR B  67     -38.638  65.322  22.280  1.00 67.22           C  
ATOM   1722  CZ  TYR B  67     -37.338  65.623  21.898  1.00 66.68           C  
ATOM   1723  OH  TYR B  67     -36.798  66.872  22.107  1.00 63.98           O  
ATOM   1724  N   MET B  68     -39.610  62.584  18.305  1.00 62.95           N  
ATOM   1725  CA  MET B  68     -39.702  63.617  17.276  1.00 63.79           C  
ATOM   1726  C   MET B  68     -40.962  63.536  16.413  1.00 67.50           C  
ATOM   1727  O   MET B  68     -41.362  64.538  15.825  1.00 70.66           O  
ATOM   1728  CB  MET B  68     -38.464  63.575  16.377  1.00 63.99           C  
ATOM   1729  CG  MET B  68     -37.200  64.069  17.064  1.00 63.71           C  
ATOM   1730  SD  MET B  68     -37.181  65.853  17.323  1.00 58.42           S  
ATOM   1731  CE  MET B  68     -36.995  66.490  15.659  1.00 59.44           C  
ATOM   1732  N   HIS B  69     -41.557  62.349  16.315  1.00 71.87           N  
ATOM   1733  CA  HIS B  69     -42.839  62.149  15.622  1.00 72.64           C  
ATOM   1734  C   HIS B  69     -44.046  62.495  16.515  1.00 72.03           C  
ATOM   1735  O   HIS B  69     -45.120  62.811  15.996  1.00 71.57           O  
ATOM   1736  CB  HIS B  69     -42.934  60.693  15.129  1.00 73.44           C  
ATOM   1737  CG  HIS B  69     -44.087  60.426  14.210  1.00 73.36           C  
ATOM   1738  ND1 HIS B  69     -44.247  61.074  13.003  1.00 73.94           N  
ATOM   1739  CD2 HIS B  69     -45.124  59.562  14.313  1.00 71.98           C  
ATOM   1740  CE1 HIS B  69     -45.342  60.633  12.409  1.00 71.88           C  
ATOM   1741  NE2 HIS B  69     -45.892  59.715  13.183  1.00 72.25           N  
ATOM   1742  N   SER B  70     -43.853  62.465  17.839  1.00 70.42           N  
ATOM   1743  CA  SER B  70     -44.953  62.554  18.819  1.00 69.88           C  
ATOM   1744  C   SER B  70     -45.793  63.839  18.765  1.00 69.69           C  
ATOM   1745  O   SER B  70     -46.999  63.797  19.007  1.00 72.18           O  
ATOM   1746  CB  SER B  70     -44.420  62.361  20.247  1.00 68.17           C  
ATOM   1747  OG  SER B  70     -43.653  63.470  20.669  1.00 63.79           O  
ATOM   1748  N   GLY B  71     -45.154  64.969  18.470  1.00 66.64           N  
ATOM   1749  CA  GLY B  71     -45.852  66.252  18.311  1.00 62.56           C  
ATOM   1750  C   GLY B  71     -45.308  67.021  17.123  1.00 59.01           C  
ATOM   1751  O   GLY B  71     -44.426  66.529  16.425  1.00 56.29           O  
ATOM   1752  N   PRO B  72     -45.842  68.227  16.873  1.00 57.61           N  
ATOM   1753  CA  PRO B  72     -45.302  69.063  15.804  1.00 57.53           C  
ATOM   1754  C   PRO B  72     -43.998  69.755  16.171  1.00 57.23           C  
ATOM   1755  O   PRO B  72     -43.710  69.954  17.351  1.00 58.30           O  
ATOM   1756  CB  PRO B  72     -46.380  70.117  15.607  1.00 57.27           C  
ATOM   1757  CG  PRO B  72     -47.036  70.226  16.929  1.00 56.90           C  
ATOM   1758  CD  PRO B  72     -47.023  68.841  17.504  1.00 57.47           C  
ATOM   1759  N   VAL B  73     -43.252  70.144  15.141  1.00 55.61           N  
ATOM   1760  CA  VAL B  73     -42.002  70.887  15.280  1.00 55.67           C  
ATOM   1761  C   VAL B  73     -42.086  72.192  14.497  1.00 54.94           C  
ATOM   1762  O   VAL B  73     -42.825  72.282  13.513  1.00 56.91           O  
ATOM   1763  CB  VAL B  73     -40.770  70.069  14.796  1.00 56.43           C  
ATOM   1764  CG1 VAL B  73     -40.602  68.827  15.654  1.00 56.41           C  
ATOM   1765  CG2 VAL B  73     -40.852  69.689  13.317  1.00 55.17           C  
ATOM   1766  N   VAL B  74     -41.326  73.192  14.935  1.00 53.19           N  
ATOM   1767  CA  VAL B  74     -41.135  74.409  14.161  1.00 52.47           C  
ATOM   1768  C   VAL B  74     -39.813  74.258  13.424  1.00 50.73           C  
ATOM   1769  O   VAL B  74     -38.752  74.303  14.034  1.00 49.47           O  
ATOM   1770  CB  VAL B  74     -41.110  75.672  15.041  1.00 52.85           C  
ATOM   1771  CG1 VAL B  74     -41.019  76.917  14.175  1.00 52.32           C  
ATOM   1772  CG2 VAL B  74     -42.355  75.751  15.912  1.00 53.36           C  
ATOM   1773  N   ALA B  75     -39.895  74.045  12.116  1.00 51.48           N  
ATOM   1774  CA  ALA B  75     -38.718  73.990  11.255  1.00 52.82           C  
ATOM   1775  C   ALA B  75     -38.382  75.399  10.794  1.00 53.08           C  
ATOM   1776  O   ALA B  75     -39.282  76.163  10.449  1.00 52.48           O  
ATOM   1777  CB  ALA B  75     -38.979  73.092  10.058  1.00 53.89           C  
ATOM   1778  N   MET B  76     -37.092  75.735  10.796  1.00 54.94           N  
ATOM   1779  CA  MET B  76     -36.619  77.085  10.458  1.00 54.44           C  
ATOM   1780  C   MET B  76     -35.328  77.067   9.648  1.00 54.01           C  
ATOM   1781  O   MET B  76     -34.562  76.108   9.696  1.00 53.59           O  
ATOM   1782  CB  MET B  76     -36.354  77.899  11.730  1.00 54.34           C  
ATOM   1783  CG  MET B  76     -37.494  77.926  12.725  1.00 55.04           C  
ATOM   1784  SD  MET B  76     -37.215  79.146  14.016  1.00 53.74           S  
ATOM   1785  CE  MET B  76     -36.155  78.221  15.120  1.00 56.06           C  
ATOM   1786  N   VAL B  77     -35.086  78.163   8.935  1.00 55.70           N  
ATOM   1787  CA  VAL B  77     -33.820  78.406   8.233  1.00 55.58           C  
ATOM   1788  C   VAL B  77     -33.397  79.845   8.519  1.00 55.76           C  
ATOM   1789  O   VAL B  77     -34.178  80.774   8.291  1.00 57.29           O  
ATOM   1790  CB  VAL B  77     -33.951  78.196   6.708  1.00 55.25           C  
ATOM   1791  CG1 VAL B  77     -32.628  78.454   5.995  1.00 55.92           C  
ATOM   1792  CG2 VAL B  77     -34.429  76.785   6.402  1.00 54.89           C  
ATOM   1793  N   TRP B  78     -32.173  80.016   9.024  1.00 54.88           N  
ATOM   1794  CA  TRP B  78     -31.626  81.330   9.388  1.00 53.39           C  
ATOM   1795  C   TRP B  78     -30.359  81.611   8.593  1.00 55.38           C  
ATOM   1796  O   TRP B  78     -29.576  80.697   8.335  1.00 57.01           O  
ATOM   1797  CB  TRP B  78     -31.313  81.380  10.881  1.00 50.38           C  
ATOM   1798  CG  TRP B  78     -32.528  81.387  11.729  1.00 47.89           C  
ATOM   1799  CD1 TRP B  78     -33.185  80.301  12.226  1.00 48.39           C  
ATOM   1800  CD2 TRP B  78     -33.245  82.533  12.184  1.00 45.85           C  
ATOM   1801  NE1 TRP B  78     -34.271  80.699  12.968  1.00 48.13           N  
ATOM   1802  CE2 TRP B  78     -34.329  82.067  12.961  1.00 46.76           C  
ATOM   1803  CE3 TRP B  78     -33.075  83.908  12.017  1.00 44.85           C  
ATOM   1804  CZ2 TRP B  78     -35.236  82.930  13.575  1.00 45.90           C  
ATOM   1805  CZ3 TRP B  78     -33.977  84.768  12.626  1.00 44.19           C  
ATOM   1806  CH2 TRP B  78     -35.045  84.274  13.395  1.00 44.60           C  
ATOM   1807  N   GLU B  79     -30.160  82.874   8.218  1.00 55.66           N  
ATOM   1808  CA  GLU B  79     -29.021  83.279   7.402  1.00 56.05           C  
ATOM   1809  C   GLU B  79     -28.093  84.251   8.127  1.00 56.63           C  
ATOM   1810  O   GLU B  79     -28.551  85.156   8.824  1.00 54.89           O  
ATOM   1811  CB  GLU B  79     -29.509  83.917   6.098  1.00 58.45           C  
ATOM   1812  CG  GLU B  79     -28.477  84.811   5.421  1.00 61.01           C  
ATOM   1813  CD  GLU B  79     -28.950  85.365   4.106  1.00 60.95           C  
ATOM   1814  OE1 GLU B  79     -29.144  86.599   4.031  1.00 62.25           O  
ATOM   1815  OE2 GLU B  79     -29.136  84.571   3.158  1.00 60.25           O1-
ATOM   1816  N   GLY B  80     -26.787  84.082   7.908  1.00 58.23           N  
ATOM   1817  CA  GLY B  80     -25.781  85.071   8.316  1.00 58.30           C  
ATOM   1818  C   GLY B  80     -24.376  84.514   8.433  1.00 57.64           C  
ATOM   1819  O   GLY B  80     -24.161  83.310   8.289  1.00 58.67           O  
ATOM   1820  N   LEU B  81     -23.424  85.402   8.708  1.00 58.16           N  
ATOM   1821  CA  LEU B  81     -22.014  85.028   8.867  1.00 59.55           C  
ATOM   1822  C   LEU B  81     -21.832  83.995   9.980  1.00 59.26           C  
ATOM   1823  O   LEU B  81     -22.152  84.261  11.139  1.00 58.51           O  
ATOM   1824  CB  LEU B  81     -21.160  86.262   9.181  1.00 60.79           C  
ATOM   1825  CG  LEU B  81     -19.645  86.067   9.309  1.00 60.97           C  
ATOM   1826  CD1 LEU B  81     -19.023  85.783   7.952  1.00 62.37           C  
ATOM   1827  CD2 LEU B  81     -18.997  87.286   9.949  1.00 60.49           C  
ATOM   1828  N   ASN B  82     -21.307  82.827   9.611  1.00 59.43           N  
ATOM   1829  CA  ASN B  82     -21.071  81.715  10.540  1.00 58.74           C  
ATOM   1830  C   ASN B  82     -22.311  81.349  11.341  1.00 56.76           C  
ATOM   1831  O   ASN B  82     -22.226  81.032  12.530  1.00 58.12           O  
ATOM   1832  CB  ASN B  82     -19.896  82.033  11.474  1.00 59.76           C  
ATOM   1833  CG  ASN B  82     -18.575  82.048  10.750  1.00 62.54           C  
ATOM   1834  OD1 ASN B  82     -18.154  81.035  10.178  1.00 66.29           O  
ATOM   1835  ND2 ASN B  82     -17.898  83.189  10.780  1.00 63.32           N  
ATOM   1836  N   VAL B  83     -23.463  81.390  10.680  1.00 55.88           N  
ATOM   1837  CA  VAL B  83     -24.728  81.079  11.338  1.00 56.95           C  
ATOM   1838  C   VAL B  83     -24.776  79.622  11.821  1.00 57.01           C  
ATOM   1839  O   VAL B  83     -25.373  79.345  12.857  1.00 58.05           O  
ATOM   1840  CB  VAL B  83     -25.956  81.446  10.461  1.00 57.81           C  
ATOM   1841  CG1 VAL B  83     -26.108  80.524   9.244  1.00 57.83           C  
ATOM   1842  CG2 VAL B  83     -27.222  81.464  11.291  1.00 59.61           C  
ATOM   1843  N   VAL B  84     -24.110  78.713  11.109  1.00 57.89           N  
ATOM   1844  CA  VAL B  84     -24.068  77.301  11.506  1.00 57.60           C  
ATOM   1845  C   VAL B  84     -23.286  77.128  12.812  1.00 60.06           C  
ATOM   1846  O   VAL B  84     -23.785  76.517  13.762  1.00 55.90           O  
ATOM   1847  CB  VAL B  84     -23.444  76.411  10.406  1.00 55.63           C  
ATOM   1848  CG1 VAL B  84     -23.298  74.974  10.882  1.00 55.70           C  
ATOM   1849  CG2 VAL B  84     -24.294  76.432   9.144  1.00 54.85           C  
ATOM   1850  N   LYS B  85     -22.066  77.666  12.847  1.00 63.97           N  
ATOM   1851  CA  LYS B  85     -21.202  77.556  14.025  1.00 66.46           C  
ATOM   1852  C   LYS B  85     -21.758  78.348  15.209  1.00 62.59           C  
ATOM   1853  O   LYS B  85     -21.893  77.807  16.306  1.00 58.16           O  
ATOM   1854  CB  LYS B  85     -19.776  78.020  13.715  1.00 72.60           C  
ATOM   1855  CG  LYS B  85     -18.768  77.614  14.781  1.00 82.08           C  
ATOM   1856  CD  LYS B  85     -17.440  78.335  14.627  1.00 89.51           C  
ATOM   1857  CE  LYS B  85     -16.513  78.003  15.790  1.00 94.96           C  
ATOM   1858  NZ  LYS B  85     -15.125  78.503  15.581  1.00 97.44           N1+
ATOM   1859  N   THR B  86     -22.076  79.623  14.978  1.00 59.20           N  
ATOM   1860  CA  THR B  86     -22.629  80.491  16.025  1.00 57.85           C  
ATOM   1861  C   THR B  86     -24.002  80.001  16.510  1.00 55.89           C  
ATOM   1862  O   THR B  86     -24.314  80.096  17.700  1.00 52.97           O  
ATOM   1863  CB  THR B  86     -22.753  81.958  15.555  1.00 57.40           C  
ATOM   1864  OG1 THR B  86     -21.584  82.336  14.825  1.00 56.10           O  
ATOM   1865  CG2 THR B  86     -22.908  82.898  16.748  1.00 57.82           C  
ATOM   1866  N   GLY B  87     -24.808  79.485  15.585  1.00 54.20           N  
ATOM   1867  CA  GLY B  87     -26.101  78.895  15.919  1.00 55.20           C  
ATOM   1868  C   GLY B  87     -25.952  77.740  16.880  1.00 56.29           C  
ATOM   1869  O   GLY B  87     -26.662  77.658  17.876  1.00 59.45           O  
ATOM   1870  N   ARG B  88     -25.015  76.852  16.575  1.00 58.59           N  
ATOM   1871  CA  ARG B  88     -24.654  75.750  17.477  1.00 58.32           C  
ATOM   1872  C   ARG B  88     -24.230  76.218  18.871  1.00 55.33           C  
ATOM   1873  O   ARG B  88     -24.616  75.613  19.872  1.00 55.63           O  
ATOM   1874  CB  ARG B  88     -23.549  74.886  16.857  1.00 59.87           C  
ATOM   1875  CG  ARG B  88     -24.085  73.726  16.011  1.00 60.53           C  
ATOM   1876  CD  ARG B  88     -24.101  72.468  16.844  1.00 63.93           C  
ATOM   1877  NE  ARG B  88     -24.782  71.342  16.196  1.00 67.40           N  
ATOM   1878  CZ  ARG B  88     -24.815  70.094  16.665  1.00 70.09           C  
ATOM   1879  NH1 ARG B  88     -24.201  69.773  17.798  1.00 72.85           N1+
ATOM   1880  NH2 ARG B  88     -25.471  69.147  15.994  1.00 71.74           N  
ATOM   1881  N   VAL B  89     -23.447  77.294  18.922  1.00 53.80           N  
ATOM   1882  CA  VAL B  89     -22.997  77.886  20.192  1.00 54.17           C  
ATOM   1883  C   VAL B  89     -24.187  78.422  21.006  1.00 53.55           C  
ATOM   1884  O   VAL B  89     -24.272  78.172  22.210  1.00 52.94           O  
ATOM   1885  CB  VAL B  89     -21.932  78.997  19.964  1.00 53.98           C  
ATOM   1886  CG1 VAL B  89     -21.635  79.772  21.242  1.00 54.78           C  
ATOM   1887  CG2 VAL B  89     -20.642  78.392  19.435  1.00 53.79           C  
ATOM   1888  N   MET B  90     -25.090  79.141  20.339  1.00 53.08           N  
ATOM   1889  CA  MET B  90     -26.309  79.671  20.968  1.00 53.03           C  
ATOM   1890  C   MET B  90     -27.222  78.573  21.513  1.00 51.74           C  
ATOM   1891  O   MET B  90     -27.839  78.750  22.565  1.00 51.36           O  
ATOM   1892  CB  MET B  90     -27.112  80.524  19.980  1.00 54.13           C  
ATOM   1893  CG  MET B  90     -26.472  81.861  19.637  1.00 54.57           C  
ATOM   1894  SD  MET B  90     -27.197  82.611  18.163  1.00 54.71           S  
ATOM   1895  CE  MET B  90     -28.942  82.638  18.582  1.00 54.09           C  
ATOM   1896  N   LEU B  91     -27.332  77.468  20.779  1.00 49.47           N  
ATOM   1897  CA  LEU B  91     -28.077  76.298  21.250  1.00 49.61           C  
ATOM   1898  C   LEU B  91     -27.464  75.700  22.518  1.00 49.17           C  
ATOM   1899  O   LEU B  91     -28.186  75.278  23.428  1.00 47.35           O  
ATOM   1900  CB  LEU B  91     -28.166  75.226  20.154  1.00 51.58           C  
ATOM   1901  CG  LEU B  91     -29.417  75.255  19.271  1.00 52.96           C  
ATOM   1902  CD1 LEU B  91     -29.614  76.587  18.560  1.00 52.83           C  
ATOM   1903  CD2 LEU B  91     -29.355  74.116  18.265  1.00 53.72           C  
ATOM   1904  N   GLY B  92     -26.132  75.677  22.568  1.00 49.40           N  
ATOM   1905  CA  GLY B  92     -25.390  75.045  23.659  1.00 48.67           C  
ATOM   1906  C   GLY B  92     -25.115  73.603  23.304  1.00 47.64           C  
ATOM   1907  O   GLY B  92     -25.488  73.146  22.220  1.00 47.98           O  
ATOM   1908  N   GLU B  93     -24.493  72.876  24.227  1.00 48.51           N  
ATOM   1909  CA  GLU B  93     -24.110  71.474  23.989  1.00 49.21           C  
ATOM   1910  C   GLU B  93     -25.353  70.603  23.837  1.00 49.02           C  
ATOM   1911  O   GLU B  93     -26.375  70.870  24.470  1.00 53.11           O  
ATOM   1912  CB  GLU B  93     -23.244  70.925  25.131  1.00 49.79           C  
ATOM   1913  CG  GLU B  93     -21.949  71.685  25.398  1.00 52.07           C  
ATOM   1914  CD  GLU B  93     -21.029  71.787  24.189  1.00 54.01           C  
ATOM   1915  OE1 GLU B  93     -20.322  72.817  24.065  1.00 57.45           O  
ATOM   1916  OE2 GLU B  93     -21.011  70.852  23.357  1.00 54.10           O1-
ATOM   1917  N   THR B  94     -25.260  69.570  23.001  1.00 47.94           N  
ATOM   1918  CA  THR B  94     -26.401  68.698  22.690  1.00 46.92           C  
ATOM   1919  C   THR B  94     -26.999  68.082  23.956  1.00 48.69           C  
ATOM   1920  O   THR B  94     -28.224  68.026  24.098  1.00 49.63           O  
ATOM   1921  CB  THR B  94     -26.012  67.592  21.690  1.00 44.94           C  
ATOM   1922  OG1 THR B  94     -25.422  68.189  20.532  1.00 42.13           O  
ATOM   1923  CG2 THR B  94     -27.230  66.780  21.249  1.00 45.33           C  
ATOM   1924  N   ASN B  95     -26.133  67.635  24.863  1.00 49.98           N  
ATOM   1925  CA  ASN B  95     -26.554  67.244  26.202  1.00 52.55           C  
ATOM   1926  C   ASN B  95     -26.740  68.522  27.024  1.00 54.79           C  
ATOM   1927  O   ASN B  95     -25.780  69.271  27.200  1.00 58.49           O  
ATOM   1928  CB  ASN B  95     -25.512  66.347  26.865  1.00 52.23           C  
ATOM   1929  CG  ASN B  95     -26.033  65.674  28.125  1.00 54.60           C  
ATOM   1930  OD1 ASN B  95     -26.958  66.157  28.789  1.00 54.95           O  
ATOM   1931  ND2 ASN B  95     -25.435  64.549  28.467  1.00 58.66           N  
ATOM   1932  N   PRO B  96     -27.968  68.775  27.531  1.00 55.55           N  
ATOM   1933  CA  PRO B  96     -28.179  69.960  28.372  1.00 56.33           C  
ATOM   1934  C   PRO B  96     -27.374  69.978  29.680  1.00 56.61           C  
ATOM   1935  O   PRO B  96     -27.122  71.060  30.219  1.00 58.96           O  
ATOM   1936  CB  PRO B  96     -29.684  69.924  28.674  1.00 56.88           C  
ATOM   1937  CG  PRO B  96     -30.276  69.018  27.654  1.00 55.61           C  
ATOM   1938  CD  PRO B  96     -29.219  68.020  27.337  1.00 55.00           C  
ATOM   1939  N   ALA B  97     -26.981  68.804  30.176  1.00 55.26           N  
ATOM   1940  CA  ALA B  97     -26.082  68.695  31.326  1.00 56.27           C  
ATOM   1941  C   ALA B  97     -24.785  69.489  31.125  1.00 57.68           C  
ATOM   1942  O   ALA B  97     -24.272  70.078  32.072  1.00 62.39           O  
ATOM   1943  CB  ALA B  97     -25.766  67.230  31.616  1.00 54.95           C  
ATOM   1944  N   ASP B  98     -24.272  69.506  29.896  1.00 58.11           N  
ATOM   1945  CA  ASP B  98     -23.053  70.251  29.555  1.00 59.47           C  
ATOM   1946  C   ASP B  98     -23.309  71.702  29.132  1.00 59.65           C  
ATOM   1947  O   ASP B  98     -22.375  72.508  29.114  1.00 64.04           O  
ATOM   1948  CB  ASP B  98     -22.302  69.546  28.422  1.00 61.31           C  
ATOM   1949  CG  ASP B  98     -21.978  68.094  28.738  1.00 62.97           C  
ATOM   1950  OD1 ASP B  98     -22.077  67.258  27.812  1.00 65.12           O  
ATOM   1951  OD2 ASP B  98     -21.636  67.790  29.902  1.00 61.45           O1-
ATOM   1952  N   SER B  99     -24.551  72.027  28.779  1.00 57.77           N  
ATOM   1953  CA  SER B  99     -24.897  73.345  28.245  1.00 57.39           C  
ATOM   1954  C   SER B  99     -24.742  74.444  29.281  1.00 56.56           C  
ATOM   1955  O   SER B  99     -25.113  74.270  30.432  1.00 59.84           O  
ATOM   1956  CB  SER B  99     -26.328  73.357  27.707  1.00 56.84           C  
ATOM   1957  OG  SER B  99     -26.427  72.562  26.538  1.00 58.36           O  
ATOM   1958  N   LYS B 100     -24.196  75.576  28.848  1.00 55.88           N  
ATOM   1959  CA  LYS B 100     -23.933  76.707  29.729  1.00 55.31           C  
ATOM   1960  C   LYS B 100     -25.174  77.580  29.878  1.00 52.41           C  
ATOM   1961  O   LYS B 100     -25.926  77.734  28.922  1.00 51.82           O  
ATOM   1962  CB  LYS B 100     -22.806  77.581  29.156  1.00 57.97           C  
ATOM   1963  CG  LYS B 100     -21.491  76.869  28.905  1.00 59.98           C  
ATOM   1964  CD  LYS B 100     -20.931  76.264  30.177  1.00 62.77           C  
ATOM   1965  CE  LYS B 100     -19.542  75.709  29.953  1.00 66.45           C  
ATOM   1966  NZ  LYS B 100     -19.175  74.832  31.095  1.00 70.40           N1+
ATOM   1967  N   PRO B 101     -25.371  78.188  31.061  1.00 49.32           N  
ATOM   1968  CA  PRO B 101     -26.343  79.273  31.170  1.00 48.27           C  
ATOM   1969  C   PRO B 101     -26.064  80.373  30.155  1.00 46.64           C  
ATOM   1970  O   PRO B 101     -24.897  80.705  29.902  1.00 45.10           O  
ATOM   1971  CB  PRO B 101     -26.149  79.777  32.601  1.00 48.13           C  
ATOM   1972  CG  PRO B 101     -25.710  78.560  33.336  1.00 49.56           C  
ATOM   1973  CD  PRO B 101     -24.824  77.819  32.377  1.00 49.92           C  
ATOM   1974  N   GLY B 102     -27.136  80.913  29.581  1.00 44.70           N  
ATOM   1975  CA  GLY B 102     -27.057  81.819  28.437  1.00 43.98           C  
ATOM   1976  C   GLY B 102     -27.449  81.162  27.128  1.00 43.07           C  
ATOM   1977  O   GLY B 102     -27.950  81.833  26.232  1.00 43.42           O  
ATOM   1978  N   THR B 103     -27.199  79.859  27.003  1.00 44.47           N  
ATOM   1979  CA  THR B 103     -27.582  79.091  25.813  1.00 44.67           C  
ATOM   1980  C   THR B 103     -29.032  78.612  25.935  1.00 42.57           C  
ATOM   1981  O   THR B 103     -29.577  78.544  27.036  1.00 40.27           O  
ATOM   1982  CB  THR B 103     -26.668  77.860  25.604  1.00 46.51           C  
ATOM   1983  OG1 THR B 103     -26.823  76.941  26.695  1.00 49.77           O  
ATOM   1984  CG2 THR B 103     -25.201  78.265  25.492  1.00 45.89           C  
ATOM   1985  N   ILE B 104     -29.640  78.284  24.797  1.00 42.14           N  
ATOM   1986  CA  ILE B 104     -31.056  77.883  24.745  1.00 42.56           C  
ATOM   1987  C   ILE B 104     -31.301  76.622  25.574  1.00 43.46           C  
ATOM   1988  O   ILE B 104     -32.163  76.608  26.449  1.00 44.61           O  
ATOM   1989  CB  ILE B 104     -31.548  77.700  23.282  1.00 41.49           C  
ATOM   1990  CG1 ILE B 104     -31.637  79.068  22.591  1.00 41.29           C  
ATOM   1991  CG2 ILE B 104     -32.911  77.010  23.231  1.00 40.98           C  
ATOM   1992  CD1 ILE B 104     -31.723  79.016  21.078  1.00 40.93           C  
ATOM   1993  N   ARG B 105     -30.535  75.572  25.304  1.00 46.20           N  
ATOM   1994  CA  ARG B 105     -30.644  74.339  26.085  1.00 46.94           C  
ATOM   1995  C   ARG B 105     -30.242  74.561  27.543  1.00 44.79           C  
ATOM   1996  O   ARG B 105     -30.851  73.998  28.449  1.00 42.64           O  
ATOM   1997  CB  ARG B 105     -29.806  73.215  25.465  1.00 49.38           C  
ATOM   1998  CG  ARG B 105     -30.311  72.722  24.113  1.00 50.62           C  
ATOM   1999  CD  ARG B 105     -29.649  71.394  23.761  1.00 52.33           C  
ATOM   2000  NE  ARG B 105     -29.902  70.955  22.384  1.00 52.59           N  
ATOM   2001  CZ  ARG B 105     -29.079  71.125  21.342  1.00 53.21           C  
ATOM   2002  NH1 ARG B 105     -27.893  71.733  21.466  1.00 53.33           N1+
ATOM   2003  NH2 ARG B 105     -29.448  70.678  20.145  1.00 53.08           N  
ATOM   2004  N   GLY B 106     -29.210  75.371  27.758  1.00 45.44           N  
ATOM   2005  CA  GLY B 106     -28.728  75.669  29.103  1.00 46.38           C  
ATOM   2006  C   GLY B 106     -29.760  76.383  29.950  1.00 45.97           C  
ATOM   2007  O   GLY B 106     -29.896  76.098  31.141  1.00 46.15           O  
ATOM   2008  N   ASP B 107     -30.497  77.296  29.329  1.00 46.71           N  
ATOM   2009  CA  ASP B 107     -31.550  78.037  30.019  1.00 47.81           C  
ATOM   2010  C   ASP B 107     -32.863  77.264  30.175  1.00 48.41           C  
ATOM   2011  O   ASP B 107     -33.536  77.434  31.193  1.00 50.84           O  
ATOM   2012  CB  ASP B 107     -31.827  79.369  29.307  1.00 48.65           C  
ATOM   2013  CG  ASP B 107     -30.692  80.382  29.472  1.00 50.35           C  
ATOM   2014  OD1 ASP B 107     -29.918  80.291  30.453  1.00 50.53           O  
ATOM   2015  OD2 ASP B 107     -30.585  81.291  28.617  1.00 49.45           O1-
ATOM   2016  N   PHE B 108     -33.211  76.409  29.207  1.00 47.73           N  
ATOM   2017  CA  PHE B 108     -34.591  75.903  29.076  1.00 48.39           C  
ATOM   2018  C   PHE B 108     -34.857  74.385  29.163  1.00 48.49           C  
ATOM   2019  O   PHE B 108     -36.011  73.982  29.078  1.00 47.34           O  
ATOM   2020  CB  PHE B 108     -35.216  76.458  27.778  1.00 47.92           C  
ATOM   2021  CG  PHE B 108     -35.340  77.958  27.761  1.00 48.29           C  
ATOM   2022  CD1 PHE B 108     -36.111  78.614  28.722  1.00 48.98           C  
ATOM   2023  CD2 PHE B 108     -34.701  78.722  26.788  1.00 47.01           C  
ATOM   2024  CE1 PHE B 108     -36.227  79.997  28.716  1.00 48.61           C  
ATOM   2025  CE2 PHE B 108     -34.817  80.105  26.782  1.00 45.98           C  
ATOM   2026  CZ  PHE B 108     -35.576  80.743  27.746  1.00 46.20           C  
ATOM   2027  N   CYS B 109     -33.841  73.546  29.341  1.00 49.37           N  
ATOM   2028  CA  CYS B 109     -34.086  72.095  29.410  1.00 49.82           C  
ATOM   2029  C   CYS B 109     -33.024  71.337  30.194  1.00 51.22           C  
ATOM   2030  O   CYS B 109     -31.949  71.874  30.471  1.00 51.80           O  
ATOM   2031  CB  CYS B 109     -34.241  71.512  28.002  1.00 49.98           C  
ATOM   2032  SG  CYS B 109     -32.739  71.518  27.007  1.00 50.50           S  
ATOM   2033  N   ILE B 110     -33.342  70.086  30.538  1.00 52.94           N  
ATOM   2034  CA  ILE B 110     -32.597  69.305  31.543  1.00 55.71           C  
ATOM   2035  C   ILE B 110     -31.981  68.005  31.003  1.00 58.61           C  
ATOM   2036  O   ILE B 110     -30.782  67.766  31.179  1.00 58.75           O  
ATOM   2037  CB  ILE B 110     -33.512  68.976  32.747  1.00 55.38           C  
ATOM   2038  CG1 ILE B 110     -33.881  70.265  33.490  1.00 54.76           C  
ATOM   2039  CG2 ILE B 110     -32.833  68.010  33.715  1.00 55.97           C  
ATOM   2040  CD1 ILE B 110     -35.072  70.136  34.415  1.00 55.10           C  
ATOM   2041  N   GLN B 111     -32.805  67.158  30.386  1.00 62.17           N  
ATOM   2042  CA  GLN B 111     -32.381  65.823  29.937  1.00 63.36           C  
ATOM   2043  C   GLN B 111     -32.080  65.800  28.437  1.00 60.97           C  
ATOM   2044  O   GLN B 111     -32.753  66.474  27.658  1.00 61.40           O  
ATOM   2045  CB  GLN B 111     -33.471  64.801  30.258  1.00 66.93           C  
ATOM   2046  CG  GLN B 111     -32.985  63.360  30.288  1.00 71.55           C  
ATOM   2047  CD  GLN B 111     -34.134  62.368  30.263  1.00 74.28           C  
ATOM   2048  OE1 GLN B 111     -34.827  62.240  29.249  1.00 81.35           O  
ATOM   2049  NE2 GLN B 111     -34.340  61.653  31.367  1.00 73.00           N  
ATOM   2050  N   VAL B 112     -31.082  65.007  28.044  1.00 59.10           N  
ATOM   2051  CA  VAL B 112     -30.672  64.887  26.635  1.00 56.57           C  
ATOM   2052  C   VAL B 112     -31.796  64.379  25.723  1.00 58.11           C  
ATOM   2053  O   VAL B 112     -31.931  64.839  24.588  1.00 57.71           O  
ATOM   2054  CB  VAL B 112     -29.384  64.034  26.478  1.00 53.80           C  
ATOM   2055  CG1 VAL B 112     -29.630  62.563  26.798  1.00 52.02           C  
ATOM   2056  CG2 VAL B 112     -28.786  64.201  25.083  1.00 51.99           C  
ATOM   2057  N   GLY B 113     -32.608  63.450  26.228  1.00 60.00           N  
ATOM   2058  CA  GLY B 113     -33.758  62.916  25.481  1.00 59.72           C  
ATOM   2059  C   GLY B 113     -34.881  63.904  25.185  1.00 58.63           C  
ATOM   2060  O   GLY B 113     -35.678  63.677  24.271  1.00 59.12           O  
ATOM   2061  N   ARG B 114     -34.956  64.983  25.970  1.00 56.70           N  
ATOM   2062  CA  ARG B 114     -35.909  66.070  25.761  1.00 54.44           C  
ATOM   2063  C   ARG B 114     -35.159  67.401  25.735  1.00 52.57           C  
ATOM   2064  O   ARG B 114     -35.292  68.213  26.655  1.00 50.40           O  
ATOM   2065  CB  ARG B 114     -36.945  66.073  26.886  1.00 54.03           C  
ATOM   2066  CG  ARG B 114     -37.784  64.810  26.987  1.00 55.70           C  
ATOM   2067  CD  ARG B 114     -38.852  64.746  25.910  1.00 56.07           C  
ATOM   2068  NE  ARG B 114     -39.616  63.498  25.990  1.00 56.98           N  
ATOM   2069  CZ  ARG B 114     -39.250  62.321  25.471  1.00 55.92           C  
ATOM   2070  NH1 ARG B 114     -38.107  62.173  24.798  1.00 57.19           N1+
ATOM   2071  NH2 ARG B 114     -40.044  61.268  25.629  1.00 54.57           N  
ATOM   2072  N   ASN B 115     -34.390  67.625  24.667  1.00 51.28           N  
ATOM   2073  CA  ASN B 115     -33.492  68.794  24.575  1.00 50.34           C  
ATOM   2074  C   ASN B 115     -33.951  69.898  23.583  1.00 51.61           C  
ATOM   2075  O   ASN B 115     -33.122  70.594  22.985  1.00 49.65           O  
ATOM   2076  CB  ASN B 115     -32.050  68.337  24.298  1.00 49.23           C  
ATOM   2077  CG  ASN B 115     -31.866  67.758  22.910  1.00 48.93           C  
ATOM   2078  OD1 ASN B 115     -32.829  67.334  22.271  1.00 50.19           O  
ATOM   2079  ND2 ASN B 115     -30.623  67.728  22.440  1.00 48.50           N  
ATOM   2080  N   ILE B 116     -35.273  70.035  23.428  1.00 52.38           N  
ATOM   2081  CA  ILE B 116     -35.988  71.215  22.845  1.00 51.96           C  
ATOM   2082  C   ILE B 116     -35.623  71.799  21.470  1.00 50.76           C  
ATOM   2083  O   ILE B 116     -36.476  72.447  20.861  1.00 51.29           O  
ATOM   2084  CB  ILE B 116     -36.095  72.407  23.844  1.00 53.31           C  
ATOM   2085  CG1 ILE B 116     -34.720  72.996  24.184  1.00 53.07           C  
ATOM   2086  CG2 ILE B 116     -36.840  71.978  25.107  1.00 54.56           C  
ATOM   2087  CD1 ILE B 116     -34.775  74.370  24.811  1.00 53.89           C  
ATOM   2088  N   ILE B 117     -34.420  71.554  20.953  1.00 48.67           N  
ATOM   2089  CA  ILE B 117     -33.980  72.207  19.719  1.00 48.36           C  
ATOM   2090  C   ILE B 117     -32.897  71.396  18.987  1.00 49.12           C  
ATOM   2091  O   ILE B 117     -32.111  70.691  19.623  1.00 47.51           O  
ATOM   2092  CB  ILE B 117     -33.496  73.643  20.040  1.00 48.79           C  
ATOM   2093  CG1 ILE B 117     -33.211  74.442  18.767  1.00 47.18           C  
ATOM   2094  CG2 ILE B 117     -32.279  73.619  20.966  1.00 49.98           C  
ATOM   2095  CD1 ILE B 117     -33.182  75.933  18.999  1.00 45.98           C  
ATOM   2096  N   HIS B 118     -32.890  71.487  17.654  1.00 51.24           N  
ATOM   2097  CA  HIS B 118     -31.809  70.960  16.810  1.00 54.38           C  
ATOM   2098  C   HIS B 118     -31.190  72.090  15.994  1.00 54.15           C  
ATOM   2099  O   HIS B 118     -31.906  72.968  15.516  1.00 56.21           O  
ATOM   2100  CB  HIS B 118     -32.317  69.875  15.842  1.00 56.25           C  
ATOM   2101  CG  HIS B 118     -31.372  69.591  14.711  1.00 57.88           C  
ATOM   2102  ND1 HIS B 118     -30.342  68.679  14.810  1.00 59.91           N  
ATOM   2103  CD2 HIS B 118     -31.271  70.137  13.475  1.00 58.40           C  
ATOM   2104  CE1 HIS B 118     -29.662  68.661  13.675  1.00 59.44           C  
ATOM   2105  NE2 HIS B 118     -30.202  69.542  12.853  1.00 58.35           N  
ATOM   2106  N   GLY B 119     -29.869  72.041  15.826  1.00 53.63           N  
ATOM   2107  CA  GLY B 119     -29.154  72.898  14.880  1.00 55.62           C  
ATOM   2108  C   GLY B 119     -28.214  72.070  14.019  1.00 58.60           C  
ATOM   2109  O   GLY B 119     -27.733  71.020  14.452  1.00 62.01           O  
ATOM   2110  N   SER B 120     -27.961  72.529  12.794  1.00 59.13           N  
ATOM   2111  CA  SER B 120     -27.034  71.844  11.885  1.00 60.04           C  
ATOM   2112  C   SER B 120     -25.604  71.918  12.409  1.00 61.51           C  
ATOM   2113  O   SER B 120     -25.171  72.976  12.871  1.00 66.65           O  
ATOM   2114  CB  SER B 120     -27.087  72.464  10.493  1.00 58.61           C  
ATOM   2115  OG  SER B 120     -28.407  72.464   9.999  1.00 57.04           O  
ATOM   2116  N   ASP B 121     -24.886  70.796  12.346  1.00 61.38           N  
ATOM   2117  CA  ASP B 121     -23.495  70.719  12.842  1.00 61.53           C  
ATOM   2118  C   ASP B 121     -22.451  71.304  11.887  1.00 61.69           C  
ATOM   2119  O   ASP B 121     -21.355  71.661  12.323  1.00 62.41           O  
ATOM   2120  CB  ASP B 121     -23.106  69.281  13.253  1.00 61.44           C  
ATOM   2121  CG  ASP B 121     -23.168  68.274  12.101  1.00 62.52           C  
ATOM   2122  OD1 ASP B 121     -23.237  67.060  12.395  1.00 61.75           O  
ATOM   2123  OD2 ASP B 121     -23.143  68.676  10.916  1.00 65.23           O1-
ATOM   2124  N   SER B 122     -22.789  71.393  10.600  1.00 63.42           N  
ATOM   2125  CA  SER B 122     -21.873  71.923   9.579  1.00 64.39           C  
ATOM   2126  C   SER B 122     -22.613  72.471   8.357  1.00 62.84           C  
ATOM   2127  O   SER B 122     -23.823  72.261   8.200  1.00 63.80           O  
ATOM   2128  CB  SER B 122     -20.894  70.836   9.132  1.00 65.82           C  
ATOM   2129  OG  SER B 122     -21.568  69.792   8.445  1.00 67.47           O  
ATOM   2130  N   VAL B 123     -21.866  73.163   7.498  1.00 60.47           N  
ATOM   2131  CA  VAL B 123     -22.412  73.736   6.263  1.00 61.57           C  
ATOM   2132  C   VAL B 123     -22.949  72.620   5.361  1.00 63.51           C  
ATOM   2133  O   VAL B 123     -24.011  72.758   4.756  1.00 61.02           O  
ATOM   2134  CB  VAL B 123     -21.357  74.583   5.506  1.00 62.09           C  
ATOM   2135  CG1 VAL B 123     -21.905  75.095   4.175  1.00 62.04           C  
ATOM   2136  CG2 VAL B 123     -20.898  75.766   6.355  1.00 61.77           C  
ATOM   2137  N   GLU B 124     -22.198  71.523   5.282  1.00 68.96           N  
ATOM   2138  CA  GLU B 124     -22.608  70.315   4.557  1.00 73.09           C  
ATOM   2139  C   GLU B 124     -23.949  69.764   5.055  1.00 70.32           C  
ATOM   2140  O   GLU B 124     -24.870  69.574   4.261  1.00 69.07           O  
ATOM   2141  CB  GLU B 124     -21.518  69.249   4.687  1.00 80.97           C  
ATOM   2142  CG  GLU B 124     -21.670  68.034   3.789  1.00 88.28           C  
ATOM   2143  CD  GLU B 124     -20.719  66.896   4.155  1.00 93.96           C  
ATOM   2144  OE1 GLU B 124     -19.501  67.142   4.123  1.00 97.94           O  
ATOM   2145  OE2 GLU B 124     -21.171  65.763   4.469  1.00 92.47           O1-
ATOM   2146  N   SER B 125     -24.049  69.519   6.363  1.00 69.32           N  
ATOM   2147  CA  SER B 125     -25.298  69.047   6.981  1.00 69.04           C  
ATOM   2148  C   SER B 125     -26.431  70.048   6.818  1.00 70.03           C  
ATOM   2149  O   SER B 125     -27.577  69.651   6.653  1.00 67.45           O  
ATOM   2150  CB  SER B 125     -25.119  68.777   8.476  1.00 68.71           C  
ATOM   2151  OG  SER B 125     -24.383  67.595   8.697  1.00 71.27           O  
ATOM   2152  N   ALA B 126     -26.105  71.338   6.900  1.00 71.46           N  
ATOM   2153  CA  ALA B 126     -27.098  72.405   6.779  1.00 71.49           C  
ATOM   2154  C   ALA B 126     -27.803  72.360   5.433  1.00 71.75           C  
ATOM   2155  O   ALA B 126     -29.030  72.338   5.382  1.00 70.01           O  
ATOM   2156  CB  ALA B 126     -26.452  73.766   6.997  1.00 73.08           C  
ATOM   2157  N   GLU B 127     -27.022  72.311   4.354  1.00 72.28           N  
ATOM   2158  CA  GLU B 127     -27.580  72.259   2.999  1.00 73.02           C  
ATOM   2159  C   GLU B 127     -28.383  70.984   2.730  1.00 71.83           C  
ATOM   2160  O   GLU B 127     -29.369  71.027   1.993  1.00 72.77           O  
ATOM   2161  CB  GLU B 127     -26.481  72.431   1.940  1.00 74.76           C  
ATOM   2162  CG  GLU B 127     -25.779  73.790   1.958  1.00 78.84           C  
ATOM   2163  CD  GLU B 127     -26.734  74.977   1.860  1.00 82.59           C  
ATOM   2164  OE1 GLU B 127     -27.692  74.922   1.057  1.00 82.83           O  
ATOM   2165  OE2 GLU B 127     -26.523  75.975   2.588  1.00 88.01           O1-
ATOM   2166  N   LYS B 128     -27.971  69.866   3.327  1.00 71.21           N  
ATOM   2167  CA  LYS B 128     -28.723  68.611   3.231  1.00 71.52           C  
ATOM   2168  C   LYS B 128     -30.054  68.713   3.980  1.00 70.12           C  
ATOM   2169  O   LYS B 128     -31.099  68.334   3.449  1.00 73.73           O  
ATOM   2170  CB  LYS B 128     -27.906  67.435   3.788  1.00 74.22           C  
ATOM   2171  CG  LYS B 128     -28.480  66.057   3.453  1.00 75.68           C  
ATOM   2172  CD  LYS B 128     -28.315  65.049   4.587  1.00 77.68           C  
ATOM   2173  CE  LYS B 128     -29.215  63.834   4.395  1.00 78.09           C  
ATOM   2174  NZ  LYS B 128     -29.225  62.948   5.594  1.00 77.17           N1+
ATOM   2175  N   GLU B 129     -29.998  69.213   5.213  1.00 67.60           N  
ATOM   2176  CA  GLU B 129     -31.184  69.357   6.071  1.00 66.71           C  
ATOM   2177  C   GLU B 129     -32.178  70.411   5.544  1.00 67.25           C  
ATOM   2178  O   GLU B 129     -33.393  70.191   5.588  1.00 65.95           O  
ATOM   2179  CB  GLU B 129     -30.764  69.668   7.517  1.00 65.11           C  
ATOM   2180  CG  GLU B 129     -30.028  68.518   8.201  1.00 64.91           C  
ATOM   2181  CD  GLU B 129     -29.291  68.910   9.476  1.00 65.79           C  
ATOM   2182  OE1 GLU B 129     -28.470  68.096   9.950  1.00 70.07           O  
ATOM   2183  OE2 GLU B 129     -29.513  70.013  10.018  1.00 63.15           O1-
ATOM   2184  N   ILE B 130     -31.669  71.533   5.027  1.00 66.18           N  
ATOM   2185  CA  ILE B 130     -32.526  72.555   4.395  1.00 65.43           C  
ATOM   2186  C   ILE B 130     -33.283  71.957   3.203  1.00 65.03           C  
ATOM   2187  O   ILE B 130     -34.507  72.074   3.127  1.00 62.16           O  
ATOM   2188  CB  ILE B 130     -31.722  73.807   3.949  1.00 65.51           C  
ATOM   2189  CG1 ILE B 130     -31.249  74.599   5.171  1.00 66.27           C  
ATOM   2190  CG2 ILE B 130     -32.565  74.733   3.069  1.00 64.81           C  
ATOM   2191  CD1 ILE B 130     -30.093  75.539   4.890  1.00 67.09           C  
ATOM   2192  N   GLY B 131     -32.543  71.329   2.285  1.00 65.15           N  
ATOM   2193  CA  GLY B 131     -33.129  70.636   1.129  1.00 64.58           C  
ATOM   2194  C   GLY B 131     -34.139  69.559   1.495  1.00 63.25           C  
ATOM   2195  O   GLY B 131     -35.144  69.378   0.805  1.00 65.14           O  
ATOM   2196  N   LEU B 132     -33.871  68.867   2.596  1.00 62.32           N  
ATOM   2197  CA  LEU B 132     -34.739  67.816   3.113  1.00 63.47           C  
ATOM   2198  C   LEU B 132     -36.069  68.332   3.692  1.00 62.50           C  
ATOM   2199  O   LEU B 132     -37.127  67.757   3.420  1.00 60.12           O  
ATOM   2200  CB  LEU B 132     -33.967  67.024   4.178  1.00 67.55           C  
ATOM   2201  CG  LEU B 132     -34.612  65.826   4.874  1.00 71.92           C  
ATOM   2202  CD1 LEU B 132     -35.148  64.814   3.871  1.00 73.40           C  
ATOM   2203  CD2 LEU B 132     -33.596  65.181   5.809  1.00 73.00           C  
ATOM   2204  N   TRP B 133     -36.004  69.400   4.490  1.00 62.61           N  
ATOM   2205  CA  TRP B 133     -37.177  69.933   5.221  1.00 61.59           C  
ATOM   2206  C   TRP B 133     -38.004  70.993   4.467  1.00 61.17           C  
ATOM   2207  O   TRP B 133     -39.171  71.210   4.802  1.00 56.52           O  
ATOM   2208  CB  TRP B 133     -36.739  70.516   6.579  1.00 60.01           C  
ATOM   2209  CG  TRP B 133     -36.405  69.490   7.624  1.00 57.93           C  
ATOM   2210  CD1 TRP B 133     -35.247  68.778   7.735  1.00 56.94           C  
ATOM   2211  CD2 TRP B 133     -37.233  69.078   8.717  1.00 56.82           C  
ATOM   2212  NE1 TRP B 133     -35.304  67.945   8.816  1.00 56.07           N  
ATOM   2213  CE2 TRP B 133     -36.509  68.106   9.442  1.00 56.59           C  
ATOM   2214  CE3 TRP B 133     -38.515  69.435   9.156  1.00 58.40           C  
ATOM   2215  CZ2 TRP B 133     -37.023  67.478  10.584  1.00 57.78           C  
ATOM   2216  CZ3 TRP B 133     -39.031  68.809  10.296  1.00 59.63           C  
ATOM   2217  CH2 TRP B 133     -38.281  67.840  10.996  1.00 58.70           C  
ATOM   2218  N   PHE B 134     -37.396  71.662   3.484  1.00 65.28           N  
ATOM   2219  CA  PHE B 134     -38.028  72.775   2.760  1.00 69.22           C  
ATOM   2220  C   PHE B 134     -37.962  72.562   1.252  1.00 74.02           C  
ATOM   2221  O   PHE B 134     -36.959  72.063   0.737  1.00 78.11           O  
ATOM   2222  CB  PHE B 134     -37.315  74.099   3.079  1.00 67.72           C  
ATOM   2223  CG  PHE B 134     -37.590  74.631   4.459  1.00 67.51           C  
ATOM   2224  CD1 PHE B 134     -38.547  75.619   4.661  1.00 68.06           C  
ATOM   2225  CD2 PHE B 134     -36.883  74.158   5.557  1.00 68.46           C  
ATOM   2226  CE1 PHE B 134     -38.797  76.120   5.930  1.00 67.55           C  
ATOM   2227  CE2 PHE B 134     -37.133  74.650   6.831  1.00 68.34           C  
ATOM   2228  CZ  PHE B 134     -38.091  75.633   7.018  1.00 68.22           C  
ATOM   2229  N   HIS B 135     -39.025  72.951   0.547  1.00 77.37           N  
ATOM   2230  CA  HIS B 135     -38.955  73.144  -0.904  1.00 80.74           C  
ATOM   2231  C   HIS B 135     -38.262  74.497  -1.108  1.00 75.93           C  
ATOM   2232  O   HIS B 135     -38.411  75.381  -0.260  1.00 72.17           O  
ATOM   2233  CB  HIS B 135     -40.348  73.157  -1.558  1.00 86.36           C  
ATOM   2234  CG  HIS B 135     -41.165  71.923  -1.295  1.00 93.36           C  
ATOM   2235  ND1 HIS B 135     -42.400  71.966  -0.679  1.00 97.18           N  
ATOM   2236  CD2 HIS B 135     -40.926  70.616  -1.560  1.00 95.64           C  
ATOM   2237  CE1 HIS B 135     -42.884  70.741  -0.578  1.00 95.77           C  
ATOM   2238  NE2 HIS B 135     -42.009  69.903  -1.103  1.00 96.19           N  
ATOM   2239  N   PRO B 136     -37.514  74.676  -2.223  1.00 76.24           N  
ATOM   2240  CA  PRO B 136     -36.811  75.964  -2.450  1.00 78.80           C  
ATOM   2241  C   PRO B 136     -37.729  77.200  -2.561  1.00 79.22           C  
ATOM   2242  O   PRO B 136     -37.307  78.324  -2.277  1.00 75.80           O  
ATOM   2243  CB  PRO B 136     -36.061  75.737  -3.777  1.00 76.52           C  
ATOM   2244  CG  PRO B 136     -36.063  74.264  -3.993  1.00 75.20           C  
ATOM   2245  CD  PRO B 136     -37.320  73.754  -3.356  1.00 74.55           C  
ATOM   2246  N   GLU B 137     -38.975  76.968  -2.957  1.00 81.58           N  
ATOM   2247  CA  GLU B 137     -39.980  78.029  -3.092  1.00 82.30           C  
ATOM   2248  C   GLU B 137     -40.399  78.600  -1.733  1.00 75.98           C  
ATOM   2249  O   GLU B 137     -40.845  79.732  -1.666  1.00 75.28           O  
ATOM   2250  CB  GLU B 137     -41.198  77.510  -3.840  1.00 90.71           C  
ATOM   2251  CG  GLU B 137     -40.846  76.737  -5.099  1.00 98.36           C  
ATOM   2252  CD  GLU B 137     -42.068  76.402  -5.930  1.00104.46           C  
ATOM   2253  OE1 GLU B 137     -42.419  75.222  -5.908  1.00108.82           O  
ATOM   2254  OE2 GLU B 137     -42.691  77.293  -6.571  1.00109.35           O1-
ATOM   2255  N   GLU B 138     -40.253  77.808  -0.667  1.00 69.88           N  
ATOM   2256  CA  GLU B 138     -40.588  78.232   0.696  1.00 64.49           C  
ATOM   2257  C   GLU B 138     -39.523  79.097   1.383  1.00 65.84           C  
ATOM   2258  O   GLU B 138     -39.791  79.661   2.444  1.00 65.54           O  
ATOM   2259  CB  GLU B 138     -40.840  77.011   1.572  1.00 62.74           C  
ATOM   2260  CG  GLU B 138     -41.980  76.131   1.101  1.00 63.70           C  
ATOM   2261  CD  GLU B 138     -42.177  74.928   1.999  1.00 65.42           C  
ATOM   2262  OE1 GLU B 138     -41.215  74.153   2.176  1.00 63.06           O  
ATOM   2263  OE2 GLU B 138     -43.292  74.756   2.533  1.00 67.09           O1-
ATOM   2264  N   LEU B 139     -38.324  79.190   0.805  1.00 67.13           N  
ATOM   2265  CA  LEU B 139     -37.235  79.981   1.391  1.00 68.89           C  
ATOM   2266  C   LEU B 139     -37.235  81.390   0.812  1.00 68.38           C  
ATOM   2267  O   LEU B 139     -36.945  81.582  -0.370  1.00 68.34           O  
ATOM   2268  CB  LEU B 139     -35.881  79.304   1.148  1.00 69.44           C  
ATOM   2269  CG  LEU B 139     -35.756  77.856   1.634  1.00 69.72           C  
ATOM   2270  CD1 LEU B 139     -34.404  77.294   1.231  1.00 69.60           C  
ATOM   2271  CD2 LEU B 139     -35.956  77.733   3.140  1.00 70.95           C  
ATOM   2272  N   VAL B 140     -37.557  82.369   1.656  1.00 70.26           N  
ATOM   2273  CA  VAL B 140     -37.785  83.745   1.213  1.00 72.54           C  
ATOM   2274  C   VAL B 140     -36.485  84.550   1.214  1.00 69.46           C  
ATOM   2275  O   VAL B 140     -35.698  84.486   2.153  1.00 65.17           O  
ATOM   2276  CB  VAL B 140     -38.844  84.479   2.078  1.00 74.88           C  
ATOM   2277  CG1 VAL B 140     -39.205  85.819   1.444  1.00 75.66           C  
ATOM   2278  CG2 VAL B 140     -40.108  83.638   2.243  1.00 74.74           C  
ATOM   2279  N   ASP B 141     -36.297  85.317   0.145  1.00 71.09           N  
ATOM   2280  CA  ASP B 141     -35.131  86.157  -0.046  1.00 73.52           C  
ATOM   2281  C   ASP B 141     -35.522  87.621   0.174  1.00 71.57           C  
ATOM   2282  O   ASP B 141     -36.450  88.113  -0.464  1.00 69.34           O  
ATOM   2283  CB  ASP B 141     -34.622  85.974  -1.480  1.00 75.45           C  
ATOM   2284  CG  ASP B 141     -33.119  86.035  -1.580  1.00 79.04           C  
ATOM   2285  OD1 ASP B 141     -32.533  87.001  -1.044  1.00 77.43           O  
ATOM   2286  OD2 ASP B 141     -32.529  85.126  -2.211  1.00 84.37           O1-
ATOM   2287  N   TYR B 142     -34.822  88.302   1.079  1.00 69.16           N  
ATOM   2288  CA  TYR B 142     -34.993  89.744   1.282  1.00 67.96           C  
ATOM   2289  C   TYR B 142     -33.790  90.337   2.008  1.00 70.47           C  
ATOM   2290  O   TYR B 142     -32.979  89.609   2.587  1.00 73.06           O  
ATOM   2291  CB  TYR B 142     -36.283  90.052   2.056  1.00 67.01           C  
ATOM   2292  CG  TYR B 142     -36.336  89.468   3.456  1.00 66.63           C  
ATOM   2293  CD1 TYR B 142     -36.707  88.143   3.664  1.00 64.88           C  
ATOM   2294  CD2 TYR B 142     -36.020  90.245   4.575  1.00 66.72           C  
ATOM   2295  CE1 TYR B 142     -36.763  87.604   4.944  1.00 65.31           C  
ATOM   2296  CE2 TYR B 142     -36.067  89.712   5.859  1.00 65.62           C  
ATOM   2297  CZ  TYR B 142     -36.438  88.389   6.038  1.00 65.57           C  
ATOM   2298  OH  TYR B 142     -36.489  87.840   7.298  1.00 65.66           O  
ATOM   2299  N   THR B 143     -33.696  91.661   1.983  1.00 71.13           N  
ATOM   2300  CA  THR B 143     -32.589  92.374   2.616  1.00 73.65           C  
ATOM   2301  C   THR B 143     -33.083  92.976   3.958  1.00 76.93           C  
ATOM   2302  O   THR B 143     -34.123  93.650   4.019  1.00 78.71           O  
ATOM   2303  CB  THR B 143     -31.937  93.411   1.681  1.00 72.95           C  
ATOM   2304  OG1 THR B 143     -32.724  94.587   1.699  1.00 77.35           O  
ATOM   2305  CG2 THR B 143     -31.817  92.931   0.218  1.00 73.09           C  
ATOM   2306  N   SER B 144     -32.363  92.675   5.040  1.00 78.18           N  
ATOM   2307  CA  SER B 144     -32.638  93.269   6.354  1.00 75.56           C  
ATOM   2308  C   SER B 144     -32.324  94.766   6.303  1.00 75.07           C  
ATOM   2309  O   SER B 144     -31.281  95.168   5.776  1.00 76.80           O  
ATOM   2310  CB  SER B 144     -31.797  92.589   7.445  1.00 75.66           C  
ATOM   2311  OG  SER B 144     -31.951  93.230   8.702  1.00 73.92           O  
ATOM   2312  N   CYS B 145     -33.225  95.582   6.847  1.00 74.13           N  
ATOM   2313  CA  CYS B 145     -33.017  97.035   6.915  1.00 73.67           C  
ATOM   2314  C   CYS B 145     -31.846  97.419   7.828  1.00 72.97           C  
ATOM   2315  O   CYS B 145     -31.283  98.503   7.689  1.00 69.08           O  
ATOM   2316  CB  CYS B 145     -34.294  97.747   7.376  1.00 75.14           C  
ATOM   2317  SG  CYS B 145     -34.726  97.498   9.119  1.00 73.60           S  
ATOM   2318  N   ALA B 146     -31.492  96.526   8.754  1.00 77.74           N  
ATOM   2319  CA  ALA B 146     -30.331  96.701   9.628  1.00 82.19           C  
ATOM   2320  C   ALA B 146     -29.040  96.046   9.095  1.00 84.84           C  
ATOM   2321  O   ALA B 146     -28.065  95.950   9.844  1.00 89.99           O  
ATOM   2322  CB  ALA B 146     -30.660  96.162  11.019  1.00 82.03           C  
ATOM   2323  N   GLN B 147     -29.011  95.624   7.823  1.00 84.62           N  
ATOM   2324  CA  GLN B 147     -27.856  94.886   7.270  1.00 84.97           C  
ATOM   2325  C   GLN B 147     -26.542  95.667   7.327  1.00 85.31           C  
ATOM   2326  O   GLN B 147     -25.501  95.099   7.666  1.00 85.98           O  
ATOM   2327  CB  GLN B 147     -28.111  94.433   5.824  1.00 85.07           C  
ATOM   2328  CG  GLN B 147     -26.890  93.784   5.171  1.00 85.90           C  
ATOM   2329  CD  GLN B 147     -27.224  92.916   3.977  1.00 86.87           C  
ATOM   2330  OE1 GLN B 147     -28.128  93.225   3.209  1.00 88.67           O  
ATOM   2331  NE2 GLN B 147     -26.480  91.825   3.805  1.00 88.33           N  
ATOM   2332  N   ASN B 148     -26.590  96.957   7.005  1.00 87.32           N  
ATOM   2333  CA  ASN B 148     -25.388  97.811   7.040  1.00 86.37           C  
ATOM   2334  C   ASN B 148     -24.861  98.082   8.454  1.00 82.86           C  
ATOM   2335  O   ASN B 148     -23.707  98.490   8.605  1.00 81.80           O  
ATOM   2336  CB  ASN B 148     -25.647  99.145   6.333  1.00 88.05           C  
ATOM   2337  CG  ASN B 148     -25.934  98.984   4.856  1.00 88.14           C  
ATOM   2338  OD1 ASN B 148     -26.914  99.532   4.368  1.00 86.01           O  
ATOM   2339  ND2 ASN B 148     -25.101  98.226   4.141  1.00 88.28           N  
ATOM   2340  N   TRP B 149     -25.704  97.868   9.468  1.00 78.64           N  
ATOM   2341  CA  TRP B 149     -25.295  97.940  10.879  1.00 74.91           C  
ATOM   2342  C   TRP B 149     -24.964  96.579  11.517  1.00 73.83           C  
ATOM   2343  O   TRP B 149     -24.460  96.545  12.631  1.00 74.41           O  
ATOM   2344  CB  TRP B 149     -26.372  98.668  11.682  1.00 72.05           C  
ATOM   2345  CG  TRP B 149     -26.623 100.024  11.126  1.00 70.33           C  
ATOM   2346  CD1 TRP B 149     -27.697 100.420  10.387  1.00 69.22           C  
ATOM   2347  CD2 TRP B 149     -25.749 101.156  11.206  1.00 68.94           C  
ATOM   2348  NE1 TRP B 149     -27.562 101.739  10.028  1.00 69.56           N  
ATOM   2349  CE2 TRP B 149     -26.373 102.215  10.512  1.00 68.31           C  
ATOM   2350  CE3 TRP B 149     -24.503 101.382  11.807  1.00 67.91           C  
ATOM   2351  CZ2 TRP B 149     -25.797 103.489  10.403  1.00 67.16           C  
ATOM   2352  CZ3 TRP B 149     -23.926 102.650  11.698  1.00 68.80           C  
ATOM   2353  CH2 TRP B 149     -24.576 103.686  10.999  1.00 68.46           C  
ATOM   2354  N   ILE B 150     -25.248  95.477  10.817  1.00 73.86           N  
ATOM   2355  CA  ILE B 150     -24.835  94.124  11.230  1.00 74.03           C  
ATOM   2356  C   ILE B 150     -23.562  93.662  10.516  1.00 76.44           C  
ATOM   2357  O   ILE B 150     -22.688  93.045  11.130  1.00 82.06           O  
ATOM   2358  CB  ILE B 150     -25.949  93.087  10.959  1.00 73.53           C  
ATOM   2359  CG1 ILE B 150     -27.224  93.448  11.736  1.00 71.82           C  
ATOM   2360  CG2 ILE B 150     -25.497  91.681  11.358  1.00 73.84           C  
ATOM   2361  CD1 ILE B 150     -28.491  92.883  11.130  1.00 70.68           C  
ATOM   2362  N   TYR B 151     -23.479  93.912   9.213  1.00 79.20           N  
ATOM   2363  CA  TYR B 151     -22.296  93.560   8.427  1.00 82.40           C  
ATOM   2364  C   TYR B 151     -21.712  94.823   7.819  1.00 87.34           C  
ATOM   2365  O   TYR B 151     -22.445  95.756   7.475  1.00 88.44           O  
ATOM   2366  CB  TYR B 151     -22.641  92.545   7.328  1.00 78.40           C  
ATOM   2367  CG  TYR B 151     -23.393  91.334   7.836  1.00 76.10           C  
ATOM   2368  CD1 TYR B 151     -22.760  90.374   8.627  1.00 76.12           C  
ATOM   2369  CD2 TYR B 151     -24.742  91.150   7.536  1.00 74.89           C  
ATOM   2370  CE1 TYR B 151     -23.450  89.266   9.099  1.00 76.15           C  
ATOM   2371  CE2 TYR B 151     -25.439  90.047   8.002  1.00 75.29           C  
ATOM   2372  CZ  TYR B 151     -24.791  89.109   8.783  1.00 77.00           C  
ATOM   2373  OH  TYR B 151     -25.484  88.016   9.246  1.00 81.28           O  
ATOM   2374  N   GLU B 152     -20.388  94.848   7.689  1.00 92.69           N  
ATOM   2375  CA  GLU B 152     -19.718  95.965   7.033  1.00 99.35           C  
ATOM   2376  C   GLU B 152     -20.010  95.845   5.542  1.00100.72           C  
ATOM   2377  O   GLU B 152     -20.512  96.760   4.892  1.00102.94           O  
ATOM   2378  CB  GLU B 152     -18.212  95.997   7.347  1.00104.26           C  
ATOM   2379  CG  GLU B 152     -17.331  96.691   6.317  1.00111.44           C  
ATOM   2380  CD  GLU B 152     -16.044  97.201   6.928  1.00115.42           C  
ATOM   2381  OE1 GLU B 152     -15.939  98.417   7.228  1.00117.17           O  
ATOM   2382  OE2 GLU B 152     -15.150  96.360   7.127  1.00114.27           O1-
ATOM   2383  OXT GLU B 152     -19.800  94.793   4.967  1.00 99.57           O1-
TER    2384      GLU B 152                                                      
ATOM   2385  N   ASN C   3     -33.999  60.734  38.863  1.00 66.95           N  
ATOM   2386  CA  ASN C   3     -34.291  62.194  38.639  1.00 69.17           C  
ATOM   2387  C   ASN C   3     -35.381  62.786  39.570  1.00 68.00           C  
ATOM   2388  O   ASN C   3     -36.167  63.655  39.179  1.00 64.36           O  
ATOM   2389  CB  ASN C   3     -34.612  62.470  37.154  1.00 70.05           C  
ATOM   2390  CG  ASN C   3     -35.832  61.722  36.640  1.00 70.92           C  
ATOM   2391  OD1 ASN C   3     -36.588  61.115  37.400  1.00 75.05           O  
ATOM   2392  ND2 ASN C   3     -36.032  61.776  35.329  1.00 69.47           N  
ATOM   2393  N   CYS C   4     -35.411  62.304  40.804  1.00 68.80           N  
ATOM   2394  CA  CYS C   4     -36.196  62.917  41.857  1.00 69.51           C  
ATOM   2395  C   CYS C   4     -35.256  63.553  42.890  1.00 67.77           C  
ATOM   2396  O   CYS C   4     -35.666  63.828  44.017  1.00 67.42           O  
ATOM   2397  CB  CYS C   4     -37.135  61.876  42.480  1.00 72.58           C  
ATOM   2398  SG  CYS C   4     -38.552  61.471  41.420  1.00 76.16           S  
ATOM   2399  N   GLU C   5     -33.999  63.799  42.497  1.00 67.70           N  
ATOM   2400  CA  GLU C   5     -33.057  64.581  43.308  1.00 68.84           C  
ATOM   2401  C   GLU C   5     -33.676  65.902  43.725  1.00 66.58           C  
ATOM   2402  O   GLU C   5     -34.395  66.519  42.948  1.00 68.27           O  
ATOM   2403  CB  GLU C   5     -31.778  64.905  42.525  1.00 72.82           C  
ATOM   2404  CG  GLU C   5     -30.616  63.941  42.713  1.00 76.28           C  
ATOM   2405  CD  GLU C   5     -29.321  64.478  42.115  1.00 77.24           C  
ATOM   2406  OE1 GLU C   5     -28.948  65.640  42.406  1.00 75.38           O  
ATOM   2407  OE2 GLU C   5     -28.671  63.741  41.348  1.00 80.33           O1-
ATOM   2408  N   ARG C   6     -33.388  66.325  44.948  1.00 63.38           N  
ATOM   2409  CA  ARG C   6     -33.757  67.651  45.413  1.00 62.32           C  
ATOM   2410  C   ARG C   6     -32.481  68.398  45.780  1.00 60.49           C  
ATOM   2411  O   ARG C   6     -31.480  67.778  46.161  1.00 63.38           O  
ATOM   2412  CB  ARG C   6     -34.700  67.557  46.609  1.00 63.72           C  
ATOM   2413  CG  ARG C   6     -35.935  66.716  46.328  1.00 67.95           C  
ATOM   2414  CD  ARG C   6     -36.845  66.586  47.538  1.00 71.79           C  
ATOM   2415  NE  ARG C   6     -36.169  65.959  48.677  1.00 75.46           N  
ATOM   2416  CZ  ARG C   6     -36.758  65.630  49.829  1.00 78.80           C  
ATOM   2417  NH1 ARG C   6     -38.063  65.836  50.025  1.00 82.07           N1+
ATOM   2418  NH2 ARG C   6     -36.036  65.072  50.798  1.00 77.54           N  
ATOM   2419  N   THR C   7     -32.512  69.722  45.636  1.00 55.63           N  
ATOM   2420  CA  THR C   7     -31.429  70.599  46.096  1.00 52.56           C  
ATOM   2421  C   THR C   7     -32.029  71.760  46.884  1.00 51.16           C  
ATOM   2422  O   THR C   7     -33.139  72.206  46.589  1.00 53.00           O  
ATOM   2423  CB  THR C   7     -30.567  71.138  44.926  1.00 51.36           C  
ATOM   2424  OG1 THR C   7     -29.377  71.735  45.443  1.00 52.17           O  
ATOM   2425  CG2 THR C   7     -31.314  72.178  44.076  1.00 51.25           C  
ATOM   2426  N   PHE C   8     -31.299  72.236  47.886  1.00 48.27           N  
ATOM   2427  CA  PHE C   8     -31.704  73.413  48.639  1.00 46.41           C  
ATOM   2428  C   PHE C   8     -31.098  74.662  47.999  1.00 46.79           C  
ATOM   2429  O   PHE C   8     -29.879  74.762  47.871  1.00 49.50           O  
ATOM   2430  CB  PHE C   8     -31.263  73.291  50.095  1.00 45.87           C  
ATOM   2431  CG  PHE C   8     -31.483  74.539  50.901  1.00 45.56           C  
ATOM   2432  CD1 PHE C   8     -32.735  74.818  51.448  1.00 44.69           C  
ATOM   2433  CD2 PHE C   8     -30.439  75.439  51.117  1.00 43.96           C  
ATOM   2434  CE1 PHE C   8     -32.944  75.972  52.188  1.00 43.97           C  
ATOM   2435  CE2 PHE C   8     -30.644  76.589  51.863  1.00 44.35           C  
ATOM   2436  CZ  PHE C   8     -31.899  76.856  52.401  1.00 44.37           C  
ATOM   2437  N   ILE C   9     -31.956  75.600  47.598  1.00 46.79           N  
ATOM   2438  CA  ILE C   9     -31.538  76.917  47.109  1.00 45.80           C  
ATOM   2439  C   ILE C   9     -32.076  77.965  48.072  1.00 45.26           C  
ATOM   2440  O   ILE C   9     -33.243  77.903  48.448  1.00 44.92           O  
ATOM   2441  CB  ILE C   9     -32.102  77.225  45.698  1.00 46.27           C  
ATOM   2442  CG1 ILE C   9     -31.742  76.121  44.684  1.00 45.01           C  
ATOM   2443  CG2 ILE C   9     -31.616  78.588  45.203  1.00 46.42           C  
ATOM   2444  CD1 ILE C   9     -30.262  75.993  44.370  1.00 44.20           C  
ATOM   2445  N   ALA C  10     -31.239  78.927  48.456  1.00 47.01           N  
ATOM   2446  CA  ALA C  10     -31.666  80.049  49.318  1.00 49.30           C  
ATOM   2447  C   ALA C  10     -31.294  81.390  48.681  1.00 49.84           C  
ATOM   2448  O   ALA C  10     -30.165  81.552  48.226  1.00 53.03           O  
ATOM   2449  CB  ALA C  10     -31.034  79.935  50.700  1.00 48.98           C  
ATOM   2450  N   ILE C  11     -32.231  82.338  48.650  1.00 48.24           N  
ATOM   2451  CA  ILE C  11     -31.947  83.699  48.185  1.00 47.29           C  
ATOM   2452  C   ILE C  11     -31.565  84.521  49.407  1.00 46.96           C  
ATOM   2453  O   ILE C  11     -32.404  84.788  50.263  1.00 47.97           O  
ATOM   2454  CB  ILE C  11     -33.145  84.337  47.460  1.00 46.90           C  
ATOM   2455  CG1 ILE C  11     -33.627  83.425  46.328  1.00 48.09           C  
ATOM   2456  CG2 ILE C  11     -32.753  85.687  46.882  1.00 46.93           C  
ATOM   2457  CD1 ILE C  11     -34.941  83.839  45.693  1.00 48.51           C  
ATOM   2458  N   LYS C  12     -30.289  84.911  49.468  1.00 46.69           N  
ATOM   2459  CA  LYS C  12     -29.707  85.704  50.546  1.00 47.02           C  
ATOM   2460  C   LYS C  12     -30.427  87.042  50.726  1.00 47.36           C  
ATOM   2461  O   LYS C  12     -31.161  87.478  49.836  1.00 47.67           O  
ATOM   2462  CB  LYS C  12     -28.210  85.889  50.283  1.00 48.36           C  
ATOM   2463  CG  LYS C  12     -27.339  84.774  50.841  1.00 50.59           C  
ATOM   2464  CD  LYS C  12     -26.799  83.825  49.799  1.00 52.02           C  
ATOM   2465  CE  LYS C  12     -25.278  83.691  49.815  1.00 52.06           C  
ATOM   2466  NZ  LYS C  12     -24.822  82.401  50.399  1.00 53.40           N  
ATOM   2467  N   PRO C  13     -30.221  87.709  51.892  1.00 48.39           N  
ATOM   2468  CA  PRO C  13     -30.890  89.038  52.159  1.00 48.87           C  
ATOM   2469  C   PRO C  13     -30.699  90.167  51.119  1.00 49.78           C  
ATOM   2470  O   PRO C  13     -31.654  90.880  50.814  1.00 48.67           O  
ATOM   2471  CB  PRO C  13     -30.288  89.467  53.513  1.00 48.08           C  
ATOM   2472  CG  PRO C  13     -29.964  88.174  54.180  1.00 48.21           C  
ATOM   2473  CD  PRO C  13     -29.424  87.305  53.078  1.00 48.06           C  
ATOM   2474  N   ASP C  14     -29.479  90.328  50.617  1.00 50.48           N  
ATOM   2475  CA  ASP C  14     -29.202  91.251  49.507  1.00 51.12           C  
ATOM   2476  C   ASP C  14     -30.015  90.938  48.246  1.00 50.04           C  
ATOM   2477  O   ASP C  14     -30.464  91.856  47.559  1.00 50.45           O  
ATOM   2478  CB  ASP C  14     -27.699  91.286  49.161  1.00 51.60           C  
ATOM   2479  CG  ASP C  14     -27.109  89.906  48.918  1.00 50.29           C  
ATOM   2480  OD1 ASP C  14     -27.532  88.953  49.604  1.00 50.39           O  
ATOM   2481  OD2 ASP C  14     -26.218  89.780  48.054  1.00 47.01           O1-
ATOM   2482  N   GLY C  15     -30.198  89.650  47.954  1.00 49.27           N  
ATOM   2483  CA  GLY C  15     -31.031  89.211  46.834  1.00 49.12           C  
ATOM   2484  C   GLY C  15     -32.487  89.626  46.985  1.00 50.00           C  
ATOM   2485  O   GLY C  15     -33.112  90.068  46.019  1.00 51.00           O  
ATOM   2486  N   VAL C  16     -33.016  89.497  48.203  1.00 48.85           N  
ATOM   2487  CA  VAL C  16     -34.385  89.917  48.518  1.00 49.27           C  
ATOM   2488  C   VAL C  16     -34.497  91.445  48.461  1.00 50.73           C  
ATOM   2489  O   VAL C  16     -35.410  91.974  47.827  1.00 50.21           O  
ATOM   2490  CB  VAL C  16     -34.837  89.408  49.910  1.00 47.05           C  
ATOM   2491  CG1 VAL C  16     -36.211  89.947  50.288  1.00 46.05           C  
ATOM   2492  CG2 VAL C  16     -34.868  87.887  49.928  1.00 48.33           C  
ATOM   2493  N   GLN C  17     -33.573  92.128  49.134  1.00 53.02           N  
ATOM   2494  CA  GLN C  17     -33.518  93.599  49.166  1.00 54.49           C  
ATOM   2495  C   GLN C  17     -33.400  94.266  47.793  1.00 54.68           C  
ATOM   2496  O   GLN C  17     -33.979  95.328  47.571  1.00 52.17           O  
ATOM   2497  CB  GLN C  17     -32.353  94.064  50.044  1.00 55.45           C  
ATOM   2498  CG  GLN C  17     -32.640  93.943  51.532  1.00 56.60           C  
ATOM   2499  CD  GLN C  17     -33.507  95.068  52.080  1.00 56.58           C  
ATOM   2500  OE1 GLN C  17     -33.717  96.094  51.427  1.00 57.31           O  
ATOM   2501  NE2 GLN C  17     -34.001  94.884  53.297  1.00 57.14           N  
ATOM   2502  N   ARG C  18     -32.666  93.633  46.878  1.00 56.08           N  
ATOM   2503  CA  ARG C  18     -32.442  94.182  45.530  1.00 56.94           C  
ATOM   2504  C   ARG C  18     -33.509  93.782  44.482  1.00 57.07           C  
ATOM   2505  O   ARG C  18     -33.478  94.265  43.343  1.00 60.02           O  
ATOM   2506  CB  ARG C  18     -31.029  93.828  45.055  1.00 55.05           C  
ATOM   2507  CG  ARG C  18     -29.951  94.546  45.858  1.00 56.12           C  
ATOM   2508  CD  ARG C  18     -28.566  94.094  45.445  1.00 57.35           C  
ATOM   2509  NE  ARG C  18     -28.354  94.304  44.014  1.00 56.19           N  
ATOM   2510  CZ  ARG C  18     -27.591  93.552  43.219  1.00 55.71           C  
ATOM   2511  NH1 ARG C  18     -26.920  92.494  43.678  1.00 56.44           N1+
ATOM   2512  NH2 ARG C  18     -27.499  93.859  41.930  1.00 56.05           N  
ATOM   2513  N   GLY C  19     -34.430  92.898  44.868  1.00 54.22           N  
ATOM   2514  CA  GLY C  19     -35.617  92.596  44.072  1.00 52.78           C  
ATOM   2515  C   GLY C  19     -35.410  91.521  43.027  1.00 52.15           C  
ATOM   2516  O   GLY C  19     -35.897  91.640  41.911  1.00 52.43           O  
ATOM   2517  N   LEU C  20     -34.722  90.449  43.405  1.00 52.13           N  
ATOM   2518  CA  LEU C  20     -34.347  89.386  42.471  1.00 50.19           C  
ATOM   2519  C   LEU C  20     -35.062  88.054  42.737  1.00 47.19           C  
ATOM   2520  O   LEU C  20     -34.731  87.049  42.111  1.00 45.93           O  
ATOM   2521  CB  LEU C  20     -32.833  89.182  42.537  1.00 50.25           C  
ATOM   2522  CG  LEU C  20     -31.979  90.422  42.268  1.00 50.65           C  
ATOM   2523  CD1 LEU C  20     -30.542  90.172  42.706  1.00 52.06           C  
ATOM   2524  CD2 LEU C  20     -32.041  90.813  40.797  1.00 51.04           C  
ATOM   2525  N   VAL C  21     -36.060  88.054  43.623  1.00 46.48           N  
ATOM   2526  CA  VAL C  21     -36.726  86.813  44.047  1.00 46.77           C  
ATOM   2527  C   VAL C  21     -37.446  86.173  42.866  1.00 47.81           C  
ATOM   2528  O   VAL C  21     -37.231  84.995  42.565  1.00 47.77           O  
ATOM   2529  CB  VAL C  21     -37.721  87.048  45.210  1.00 45.63           C  
ATOM   2530  CG1 VAL C  21     -38.484  85.773  45.560  1.00 44.88           C  
ATOM   2531  CG2 VAL C  21     -36.986  87.566  46.442  1.00 45.54           C  
ATOM   2532  N   GLY C  22     -38.282  86.968  42.201  1.00 49.50           N  
ATOM   2533  CA  GLY C  22     -39.001  86.532  41.011  1.00 49.37           C  
ATOM   2534  C   GLY C  22     -38.072  86.163  39.870  1.00 49.76           C  
ATOM   2535  O   GLY C  22     -38.239  85.124  39.230  1.00 49.93           O  
ATOM   2536  N   GLU C  23     -37.075  87.008  39.639  1.00 50.23           N  
ATOM   2537  CA  GLU C  23     -36.087  86.770  38.591  1.00 52.01           C  
ATOM   2538  C   GLU C  23     -35.359  85.433  38.772  1.00 50.33           C  
ATOM   2539  O   GLU C  23     -35.171  84.696  37.812  1.00 48.51           O  
ATOM   2540  CB  GLU C  23     -35.075  87.920  38.551  1.00 55.10           C  
ATOM   2541  CG  GLU C  23     -34.285  88.012  37.256  1.00 58.29           C  
ATOM   2542  CD  GLU C  23     -35.101  88.568  36.103  1.00 60.54           C  
ATOM   2543  OE1 GLU C  23     -35.521  87.765  35.240  1.00 66.47           O  
ATOM   2544  OE2 GLU C  23     -35.334  89.800  36.073  1.00 57.51           O1-
ATOM   2545  N   ILE C  24     -34.952  85.141  40.007  1.00 50.32           N  
ATOM   2546  CA  ILE C  24     -34.243  83.896  40.339  1.00 48.75           C  
ATOM   2547  C   ILE C  24     -35.154  82.679  40.203  1.00 49.06           C  
ATOM   2548  O   ILE C  24     -34.781  81.701  39.557  1.00 47.77           O  
ATOM   2549  CB  ILE C  24     -33.616  83.965  41.756  1.00 47.47           C  
ATOM   2550  CG1 ILE C  24     -32.376  84.872  41.718  1.00 46.84           C  
ATOM   2551  CG2 ILE C  24     -33.236  82.582  42.279  1.00 46.96           C  
ATOM   2552  CD1 ILE C  24     -31.942  85.414  43.062  1.00 46.66           C  
ATOM   2553  N   ILE C  25     -36.337  82.749  40.810  1.00 49.02           N  
ATOM   2554  CA  ILE C  25     -37.331  81.664  40.717  1.00 49.16           C  
ATOM   2555  C   ILE C  25     -37.693  81.344  39.261  1.00 49.53           C  
ATOM   2556  O   ILE C  25     -37.824  80.179  38.892  1.00 47.24           O  
ATOM   2557  CB  ILE C  25     -38.607  81.995  41.531  1.00 48.95           C  
ATOM   2558  CG1 ILE C  25     -38.304  81.881  43.028  1.00 49.22           C  
ATOM   2559  CG2 ILE C  25     -39.759  81.057  41.177  1.00 48.99           C  
ATOM   2560  CD1 ILE C  25     -39.320  82.546  43.932  1.00 50.12           C  
ATOM   2561  N   LYS C  26     -37.847  82.394  38.456  1.00 50.50           N  
ATOM   2562  CA  LYS C  26     -38.159  82.276  37.032  1.00 50.28           C  
ATOM   2563  C   LYS C  26     -37.167  81.384  36.296  1.00 47.47           C  
ATOM   2564  O   LYS C  26     -37.571  80.585  35.450  1.00 47.59           O  
ATOM   2565  CB  LYS C  26     -38.202  83.678  36.398  1.00 53.62           C  
ATOM   2566  CG  LYS C  26     -38.502  83.748  34.906  1.00 55.99           C  
ATOM   2567  CD  LYS C  26     -39.030  85.135  34.558  1.00 58.01           C  
ATOM   2568  CE  LYS C  26     -39.150  85.360  33.065  1.00 60.46           C  
ATOM   2569  NZ  LYS C  26     -37.846  85.743  32.469  1.00 64.48           N1+
ATOM   2570  N   ARG C  27     -35.882  81.514  36.628  1.00 45.47           N  
ATOM   2571  CA  ARG C  27     -34.822  80.731  35.969  1.00 45.55           C  
ATOM   2572  C   ARG C  27     -34.919  79.232  36.230  1.00 45.06           C  
ATOM   2573  O   ARG C  27     -34.702  78.439  35.322  1.00 44.81           O  
ATOM   2574  CB  ARG C  27     -33.440  81.230  36.374  1.00 44.18           C  
ATOM   2575  CG  ARG C  27     -33.202  82.661  35.952  1.00 44.73           C  
ATOM   2576  CD  ARG C  27     -31.740  82.984  35.787  1.00 45.35           C  
ATOM   2577  NE  ARG C  27     -31.568  84.338  35.276  1.00 46.26           N  
ATOM   2578  CZ  ARG C  27     -30.398  84.901  34.995  1.00 47.41           C  
ATOM   2579  NH1 ARG C  27     -29.254  84.233  35.171  1.00 48.90           N1+
ATOM   2580  NH2 ARG C  27     -30.370  86.144  34.525  1.00 47.81           N  
ATOM   2581  N   PHE C  28     -35.243  78.859  37.464  1.00 44.76           N  
ATOM   2582  CA  PHE C  28     -35.490  77.459  37.812  1.00 44.08           C  
ATOM   2583  C   PHE C  28     -36.756  76.920  37.159  1.00 42.87           C  
ATOM   2584  O   PHE C  28     -36.791  75.761  36.746  1.00 43.64           O  
ATOM   2585  CB  PHE C  28     -35.538  77.272  39.335  1.00 45.59           C  
ATOM   2586  CG  PHE C  28     -34.186  77.339  39.987  1.00 47.32           C  
ATOM   2587  CD1 PHE C  28     -33.678  78.553  40.451  1.00 48.18           C  
ATOM   2588  CD2 PHE C  28     -33.408  76.189  40.127  1.00 47.83           C  
ATOM   2589  CE1 PHE C  28     -32.424  78.620  41.043  1.00 47.60           C  
ATOM   2590  CE2 PHE C  28     -32.157  76.249  40.722  1.00 47.18           C  
ATOM   2591  CZ  PHE C  28     -31.664  77.464  41.177  1.00 47.93           C  
ATOM   2592  N   GLU C  29     -37.794  77.748  37.083  1.00 43.50           N  
ATOM   2593  CA  GLU C  29     -39.058  77.345  36.456  1.00 45.22           C  
ATOM   2594  C   GLU C  29     -38.878  77.093  34.972  1.00 45.68           C  
ATOM   2595  O   GLU C  29     -39.198  76.007  34.491  1.00 48.31           O  
ATOM   2596  CB  GLU C  29     -40.164  78.390  36.680  1.00 45.87           C  
ATOM   2597  CG  GLU C  29     -40.747  78.374  38.086  1.00 45.48           C  
ATOM   2598  CD  GLU C  29     -41.883  79.359  38.255  1.00 45.88           C  
ATOM   2599  OE1 GLU C  29     -41.632  80.573  38.106  1.00 43.53           O  
ATOM   2600  OE2 GLU C  29     -43.019  78.920  38.551  1.00 46.31           O1-
ATOM   2601  N   GLN C  30     -38.346  78.082  34.260  1.00 48.37           N  
ATOM   2602  CA  GLN C  30     -38.165  77.967  32.805  1.00 52.27           C  
ATOM   2603  C   GLN C  30     -37.143  76.898  32.400  1.00 51.18           C  
ATOM   2604  O   GLN C  30     -37.221  76.368  31.295  1.00 53.42           O  
ATOM   2605  CB  GLN C  30     -37.810  79.317  32.170  1.00 55.02           C  
ATOM   2606  CG  GLN C  30     -36.400  79.815  32.453  1.00 58.23           C  
ATOM   2607  CD  GLN C  30     -36.173  81.243  32.006  1.00 60.44           C  
ATOM   2608  OE1 GLN C  30     -37.121  81.973  31.754  1.00 59.99           O  
ATOM   2609  NE2 GLN C  30     -34.907  81.648  31.910  1.00 60.70           N  
ATOM   2610  N   LYS C  31     -36.201  76.594  33.287  1.00 50.18           N  
ATOM   2611  CA  LYS C  31     -35.259  75.490  33.087  1.00 50.32           C  
ATOM   2612  C   LYS C  31     -35.952  74.124  33.019  1.00 50.32           C  
ATOM   2613  O   LYS C  31     -35.534  73.260  32.245  1.00 50.44           O  
ATOM   2614  CB  LYS C  31     -34.214  75.502  34.204  1.00 50.55           C  
ATOM   2615  CG  LYS C  31     -33.212  74.362  34.198  1.00 51.31           C  
ATOM   2616  CD  LYS C  31     -32.354  74.365  32.954  1.00 50.40           C  
ATOM   2617  CE  LYS C  31     -31.217  73.378  33.113  1.00 50.18           C  
ATOM   2618  NZ  LYS C  31     -30.277  73.471  31.972  1.00 50.81           N1+
ATOM   2619  N   GLY C  32     -37.001  73.943  33.824  1.00 49.78           N  
ATOM   2620  CA  GLY C  32     -37.775  72.691  33.877  1.00 48.45           C  
ATOM   2621  C   GLY C  32     -37.902  72.049  35.252  1.00 46.67           C  
ATOM   2622  O   GLY C  32     -38.668  71.107  35.416  1.00 47.07           O  
ATOM   2623  N   PHE C  33     -37.152  72.547  36.237  1.00 44.75           N  
ATOM   2624  CA  PHE C  33     -37.172  71.988  37.589  1.00 44.07           C  
ATOM   2625  C   PHE C  33     -38.484  72.298  38.299  1.00 44.88           C  
ATOM   2626  O   PHE C  33     -39.132  73.296  38.002  1.00 46.86           O  
ATOM   2627  CB  PHE C  33     -35.998  72.516  38.421  1.00 42.95           C  
ATOM   2628  CG  PHE C  33     -34.650  72.094  37.902  1.00 42.67           C  
ATOM   2629  CD1 PHE C  33     -34.343  70.744  37.749  1.00 42.45           C  
ATOM   2630  CD2 PHE C  33     -33.680  73.041  37.563  1.00 41.63           C  
ATOM   2631  CE1 PHE C  33     -33.100  70.343  37.275  1.00 42.40           C  
ATOM   2632  CE2 PHE C  33     -32.437  72.643  37.088  1.00 40.67           C  
ATOM   2633  CZ  PHE C  33     -32.146  71.296  36.948  1.00 41.67           C  
ATOM   2634  N   ARG C  34     -38.848  71.431  39.240  1.00 45.36           N  
ATOM   2635  CA  ARG C  34     -40.122  71.493  39.941  1.00 47.18           C  
ATOM   2636  C   ARG C  34     -39.928  72.127  41.310  1.00 47.98           C  
ATOM   2637  O   ARG C  34     -39.076  71.684  42.076  1.00 47.61           O  
ATOM   2638  CB  ARG C  34     -40.688  70.080  40.100  1.00 49.54           C  
ATOM   2639  CG  ARG C  34     -42.069  70.023  40.721  1.00 51.65           C  
ATOM   2640  CD  ARG C  34     -42.642  68.616  40.724  1.00 54.74           C  
ATOM   2641  NE  ARG C  34     -42.080  67.746  41.768  1.00 59.30           N  
ATOM   2642  CZ  ARG C  34     -42.343  67.816  43.086  1.00 63.07           C  
ATOM   2643  NH1 ARG C  34     -41.772  66.951  43.923  1.00 65.12           N1+
ATOM   2644  NH2 ARG C  34     -43.153  68.743  43.595  1.00 61.33           N  
ATOM   2645  N   LEU C  35     -40.724  73.151  41.624  1.00 49.00           N  
ATOM   2646  CA  LEU C  35     -40.680  73.771  42.951  1.00 49.61           C  
ATOM   2647  C   LEU C  35     -41.335  72.830  43.964  1.00 51.68           C  
ATOM   2648  O   LEU C  35     -42.504  72.472  43.815  1.00 54.34           O  
ATOM   2649  CB  LEU C  35     -41.388  75.129  42.961  1.00 47.76           C  
ATOM   2650  CG  LEU C  35     -41.399  75.891  44.292  1.00 46.31           C  
ATOM   2651  CD1 LEU C  35     -39.998  76.275  44.741  1.00 45.65           C  
ATOM   2652  CD2 LEU C  35     -42.281  77.123  44.182  1.00 47.00           C  
ATOM   2653  N   VAL C  36     -40.572  72.447  44.982  1.00 51.86           N  
ATOM   2654  CA  VAL C  36     -41.014  71.500  46.003  1.00 51.33           C  
ATOM   2655  C   VAL C  36     -41.329  72.210  47.320  1.00 50.37           C  
ATOM   2656  O   VAL C  36     -42.315  71.885  47.979  1.00 48.67           O  
ATOM   2657  CB  VAL C  36     -39.935  70.416  46.248  1.00 52.15           C  
ATOM   2658  CG1 VAL C  36     -40.350  69.450  47.332  1.00 51.98           C  
ATOM   2659  CG2 VAL C  36     -39.633  69.679  44.956  1.00 53.49           C  
ATOM   2660  N   GLY C  37     -40.468  73.145  47.713  1.00 50.55           N  
ATOM   2661  CA  GLY C  37     -40.653  73.922  48.936  1.00 51.53           C  
ATOM   2662  C   GLY C  37     -40.255  75.368  48.742  1.00 51.73           C  
ATOM   2663  O   GLY C  37     -39.381  75.675  47.926  1.00 54.97           O  
ATOM   2664  N   LEU C  38     -40.901  76.252  49.497  1.00 51.26           N  
ATOM   2665  CA  LEU C  38     -40.664  77.686  49.395  1.00 53.54           C  
ATOM   2666  C   LEU C  38     -41.174  78.370  50.652  1.00 52.53           C  
ATOM   2667  O   LEU C  38     -42.315  78.166  51.037  1.00 55.23           O  
ATOM   2668  CB  LEU C  38     -41.370  78.255  48.160  1.00 54.35           C  
ATOM   2669  CG  LEU C  38     -41.388  79.770  47.931  1.00 56.35           C  
ATOM   2670  CD1 LEU C  38     -39.983  80.280  47.682  1.00 57.80           C  
ATOM   2671  CD2 LEU C  38     -42.284  80.124  46.757  1.00 56.46           C  
ATOM   2672  N   LYS C  39     -40.329  79.176  51.282  1.00 53.18           N  
ATOM   2673  CA  LYS C  39     -40.728  79.927  52.466  1.00 56.09           C  
ATOM   2674  C   LYS C  39     -39.820  81.126  52.703  1.00 56.72           C  
ATOM   2675  O   LYS C  39     -38.680  81.161  52.242  1.00 58.87           O  
ATOM   2676  CB  LYS C  39     -40.747  79.030  53.702  1.00 59.43           C  
ATOM   2677  CG  LYS C  39     -39.464  78.244  53.899  1.00 62.34           C  
ATOM   2678  CD  LYS C  39     -39.155  77.962  55.358  1.00 63.98           C  
ATOM   2679  CE  LYS C  39     -40.041  76.876  55.933  1.00 64.44           C  
ATOM   2680  NZ  LYS C  39     -39.563  76.514  57.295  1.00 63.86           N1+
ATOM   2681  N   PHE C  40     -40.355  82.100  53.428  1.00 57.78           N  
ATOM   2682  CA  PHE C  40     -39.730  83.395  53.635  1.00 58.34           C  
ATOM   2683  C   PHE C  40     -39.577  83.571  55.136  1.00 61.23           C  
ATOM   2684  O   PHE C  40     -40.568  83.602  55.862  1.00 62.51           O  
ATOM   2685  CB  PHE C  40     -40.633  84.467  53.036  1.00 57.03           C  
ATOM   2686  CG  PHE C  40     -40.035  85.845  52.992  1.00 56.49           C  
ATOM   2687  CD1 PHE C  40     -38.857  86.085  52.295  1.00 56.54           C  
ATOM   2688  CD2 PHE C  40     -40.688  86.919  53.588  1.00 56.26           C  
ATOM   2689  CE1 PHE C  40     -38.319  87.360  52.228  1.00 56.04           C  
ATOM   2690  CE2 PHE C  40     -40.156  88.198  53.527  1.00 55.81           C  
ATOM   2691  CZ  PHE C  40     -38.969  88.420  52.846  1.00 55.37           C  
ATOM   2692  N   MET C  41     -38.333  83.680  55.591  1.00 63.14           N  
ATOM   2693  CA  MET C  41     -38.021  83.625  57.013  1.00 62.25           C  
ATOM   2694  C   MET C  41     -36.753  84.389  57.331  1.00 62.08           C  
ATOM   2695  O   MET C  41     -35.835  84.441  56.514  1.00 62.35           O  
ATOM   2696  CB  MET C  41     -37.845  82.167  57.440  1.00 64.55           C  
ATOM   2697  CG  MET C  41     -36.816  81.383  56.632  1.00 65.53           C  
ATOM   2698  SD  MET C  41     -36.672  79.658  57.147  1.00 68.45           S  
ATOM   2699  CE  MET C  41     -35.868  79.862  58.737  1.00 68.57           C  
ATOM   2700  N   GLN C  42     -36.705  84.976  58.520  1.00 62.87           N  
ATOM   2701  CA  GLN C  42     -35.455  85.479  59.060  1.00 63.63           C  
ATOM   2702  C   GLN C  42     -34.790  84.326  59.791  1.00 62.06           C  
ATOM   2703  O   GLN C  42     -35.331  83.815  60.768  1.00 62.05           O  
ATOM   2704  CB  GLN C  42     -35.679  86.655  60.001  1.00 66.87           C  
ATOM   2705  CG  GLN C  42     -34.373  87.259  60.507  1.00 69.45           C  
ATOM   2706  CD  GLN C  42     -34.404  88.773  60.627  1.00 74.47           C  
ATOM   2707  OE1 GLN C  42     -35.117  89.460  59.890  1.00 75.91           O  
ATOM   2708  NE2 GLN C  42     -33.600  89.307  61.544  1.00 79.81           N  
ATOM   2709  N   ALA C  43     -33.625  83.917  59.300  1.00 61.79           N  
ATOM   2710  CA  ALA C  43     -32.884  82.791  59.863  1.00 61.21           C  
ATOM   2711  C   ALA C  43     -32.179  83.196  61.154  1.00 59.87           C  
ATOM   2712  O   ALA C  43     -31.576  84.266  61.226  1.00 58.08           O  
ATOM   2713  CB  ALA C  43     -31.866  82.272  58.858  1.00 59.87           C  
ATOM   2714  N   SER C  44     -32.258  82.326  62.160  1.00 60.58           N  
ATOM   2715  CA  SER C  44     -31.529  82.497  63.419  1.00 59.56           C  
ATOM   2716  C   SER C  44     -30.055  82.158  63.219  1.00 62.13           C  
ATOM   2717  O   SER C  44     -29.702  81.413  62.303  1.00 60.94           O  
ATOM   2718  CB  SER C  44     -32.114  81.587  64.498  1.00 57.38           C  
ATOM   2719  OG  SER C  44     -31.948  80.222  64.149  1.00 56.48           O  
ATOM   2720  N   GLU C  45     -29.205  82.684  64.098  1.00 64.77           N  
ATOM   2721  CA  GLU C  45     -27.756  82.430  64.036  1.00 64.90           C  
ATOM   2722  C   GLU C  45     -27.366  80.963  64.255  1.00 64.24           C  
ATOM   2723  O   GLU C  45     -26.383  80.497  63.684  1.00 63.14           O  
ATOM   2724  CB  GLU C  45     -27.019  83.312  65.039  1.00 67.94           C  
ATOM   2725  CG  GLU C  45     -27.025  84.781  64.661  1.00 72.52           C  
ATOM   2726  CD  GLU C  45     -26.964  85.685  65.872  1.00 76.51           C  
ATOM   2727  OE1 GLU C  45     -28.001  85.804  66.567  1.00 82.83           O  
ATOM   2728  OE2 GLU C  45     -25.891  86.270  66.122  1.00 72.81           O1-
ATOM   2729  N   ASP C  46     -28.126  80.250  65.084  1.00 64.08           N  
ATOM   2730  CA  ASP C  46     -27.897  78.819  65.302  1.00 64.98           C  
ATOM   2731  C   ASP C  46     -28.172  78.002  64.043  1.00 60.26           C  
ATOM   2732  O   ASP C  46     -27.454  77.043  63.763  1.00 56.92           O  
ATOM   2733  CB  ASP C  46     -28.747  78.295  66.473  1.00 69.40           C  
ATOM   2734  CG  ASP C  46     -28.275  78.816  67.828  1.00 72.11           C  
ATOM   2735  OD1 ASP C  46     -27.540  79.829  67.887  1.00 70.46           O  
ATOM   2736  OD2 ASP C  46     -28.640  78.197  68.848  1.00 78.66           O1-
ATOM   2737  N   LEU C  47     -29.212  78.379  63.301  1.00 60.67           N  
ATOM   2738  CA  LEU C  47     -29.512  77.763  62.004  1.00 61.09           C  
ATOM   2739  C   LEU C  47     -28.392  78.032  60.994  1.00 60.08           C  
ATOM   2740  O   LEU C  47     -27.946  77.114  60.303  1.00 61.83           O  
ATOM   2741  CB  LEU C  47     -30.850  78.275  61.451  1.00 59.39           C  
ATOM   2742  CG  LEU C  47     -31.353  77.673  60.133  1.00 60.82           C  
ATOM   2743  CD1 LEU C  47     -31.778  76.227  60.318  1.00 61.66           C  
ATOM   2744  CD2 LEU C  47     -32.513  78.480  59.578  1.00 62.61           C  
ATOM   2745  N   LEU C  48     -27.953  79.285  60.913  1.00 56.91           N  
ATOM   2746  CA  LEU C  48     -26.913  79.688  59.963  1.00 57.24           C  
ATOM   2747  C   LEU C  48     -25.555  79.065  60.274  1.00 59.39           C  
ATOM   2748  O   LEU C  48     -24.834  78.659  59.359  1.00 57.17           O  
ATOM   2749  CB  LEU C  48     -26.793  81.217  59.908  1.00 56.02           C  
ATOM   2750  CG  LEU C  48     -28.006  81.956  59.324  1.00 53.64           C  
ATOM   2751  CD1 LEU C  48     -27.939  83.442  59.648  1.00 54.66           C  
ATOM   2752  CD2 LEU C  48     -28.115  81.739  57.826  1.00 51.32           C  
ATOM   2753  N   LYS C  49     -25.219  78.990  61.561  1.00 62.65           N  
ATOM   2754  CA  LYS C  49     -23.967  78.364  62.010  1.00 61.86           C  
ATOM   2755  C   LYS C  49     -23.911  76.873  61.695  1.00 59.76           C  
ATOM   2756  O   LYS C  49     -22.845  76.353  61.356  1.00 61.13           O  
ATOM   2757  CB  LYS C  49     -23.731  78.617  63.509  1.00 65.03           C  
ATOM   2758  CG  LYS C  49     -23.211  80.019  63.795  1.00 68.56           C  
ATOM   2759  CD  LYS C  49     -23.161  80.331  65.277  1.00 72.29           C  
ATOM   2760  CE  LYS C  49     -22.579  81.719  65.502  1.00 76.33           C  
ATOM   2761  NZ  LYS C  49     -22.552  82.095  66.943  1.00 78.52           N1+
ATOM   2762  N   GLU C  50     -25.046  76.189  61.816  1.00 59.50           N  
ATOM   2763  CA  GLU C  50     -25.136  74.770  61.460  1.00 61.67           C  
ATOM   2764  C   GLU C  50     -25.058  74.581  59.952  1.00 59.66           C  
ATOM   2765  O   GLU C  50     -24.391  73.660  59.473  1.00 58.71           O  
ATOM   2766  CB  GLU C  50     -26.441  74.162  61.999  1.00 65.29           C  
ATOM   2767  CG  GLU C  50     -26.630  72.653  61.819  1.00 67.91           C  
ATOM   2768  CD  GLU C  50     -25.510  71.810  62.412  1.00 69.32           C  
ATOM   2769  OE1 GLU C  50     -25.275  70.676  61.931  1.00 67.86           O  
ATOM   2770  OE2 GLU C  50     -24.859  72.282  63.366  1.00 71.24           O1-
ATOM   2771  N   HIS C  51     -25.755  75.449  59.222  1.00 58.38           N  
ATOM   2772  CA  HIS C  51     -25.789  75.418  57.754  1.00 58.37           C  
ATOM   2773  C   HIS C  51     -24.402  75.646  57.136  1.00 58.48           C  
ATOM   2774  O   HIS C  51     -23.995  74.900  56.246  1.00 55.58           O  
ATOM   2775  CB  HIS C  51     -26.801  76.454  57.234  1.00 57.34           C  
ATOM   2776  CG  HIS C  51     -26.815  76.614  55.745  1.00 55.99           C  
ATOM   2777  ND1 HIS C  51     -26.260  77.707  55.121  1.00 54.55           N  
ATOM   2778  CD2 HIS C  51     -27.325  75.837  54.761  1.00 53.15           C  
ATOM   2779  CE1 HIS C  51     -26.417  77.592  53.816  1.00 53.47           C  
ATOM   2780  NE2 HIS C  51     -27.061  76.466  53.571  1.00 52.37           N  
ATOM   2781  N   TYR C  52     -23.685  76.653  57.635  1.00 58.57           N  
ATOM   2782  CA  TYR C  52     -22.328  76.962  57.171  1.00 60.53           C  
ATOM   2783  C   TYR C  52     -21.230  76.367  58.081  1.00 63.85           C  
ATOM   2784  O   TYR C  52     -20.172  76.979  58.268  1.00 65.21           O  
ATOM   2785  CB  TYR C  52     -22.151  78.489  57.044  1.00 60.21           C  
ATOM   2786  CG  TYR C  52     -22.998  79.143  55.967  1.00 59.05           C  
ATOM   2787  CD1 TYR C  52     -22.871  78.765  54.631  1.00 57.25           C  
ATOM   2788  CD2 TYR C  52     -23.906  80.162  56.277  1.00 57.62           C  
ATOM   2789  CE1 TYR C  52     -23.627  79.368  53.640  1.00 55.15           C  
ATOM   2790  CE2 TYR C  52     -24.668  80.768  55.289  1.00 55.66           C  
ATOM   2791  CZ  TYR C  52     -24.524  80.370  53.974  1.00 54.99           C  
ATOM   2792  OH  TYR C  52     -25.278  80.958  52.995  1.00 52.02           O  
ATOM   2793  N   VAL C  53     -21.466  75.174  58.630  1.00 64.90           N  
ATOM   2794  CA  VAL C  53     -20.555  74.582  59.629  1.00 64.97           C  
ATOM   2795  C   VAL C  53     -19.177  74.215  59.058  1.00 62.62           C  
ATOM   2796  O   VAL C  53     -18.175  74.281  59.775  1.00 63.09           O  
ATOM   2797  CB  VAL C  53     -21.194  73.359  60.345  1.00 64.92           C  
ATOM   2798  CG1 VAL C  53     -21.274  72.132  59.433  1.00 64.29           C  
ATOM   2799  CG2 VAL C  53     -20.447  73.040  61.632  1.00 64.36           C  
ATOM   2800  N   ASP C  54     -19.127  73.849  57.779  1.00 60.27           N  
ATOM   2801  CA  ASP C  54     -17.852  73.566  57.110  1.00 59.55           C  
ATOM   2802  C   ASP C  54     -16.950  74.798  57.003  1.00 60.07           C  
ATOM   2803  O   ASP C  54     -15.736  74.657  56.900  1.00 61.21           O  
ATOM   2804  CB  ASP C  54     -18.085  72.970  55.720  1.00 60.57           C  
ATOM   2805  CG  ASP C  54     -18.780  71.604  55.767  1.00 63.12           C  
ATOM   2806  OD1 ASP C  54     -19.284  71.139  54.715  1.00 63.83           O  
ATOM   2807  OD2 ASP C  54     -18.834  70.992  56.855  1.00 64.83           O1-
ATOM   2808  N   LEU C  55     -17.542  75.991  57.045  1.00 62.41           N  
ATOM   2809  CA  LEU C  55     -16.802  77.254  57.025  1.00 64.34           C  
ATOM   2810  C   LEU C  55     -16.583  77.875  58.407  1.00 68.26           C  
ATOM   2811  O   LEU C  55     -16.145  79.019  58.501  1.00 70.12           O  
ATOM   2812  CB  LEU C  55     -17.545  78.258  56.141  1.00 64.48           C  
ATOM   2813  CG  LEU C  55     -17.959  77.772  54.749  1.00 64.34           C  
ATOM   2814  CD1 LEU C  55     -18.810  78.831  54.063  1.00 65.91           C  
ATOM   2815  CD2 LEU C  55     -16.742  77.441  53.906  1.00 64.06           C  
ATOM   2816  N   LYS C  56     -16.903  77.138  59.469  1.00 75.88           N  
ATOM   2817  CA  LYS C  56     -16.795  77.610  60.858  1.00 85.21           C  
ATOM   2818  C   LYS C  56     -15.517  78.395  61.223  1.00 87.72           C  
ATOM   2819  O   LYS C  56     -15.601  79.491  61.793  1.00 88.79           O  
ATOM   2820  CB  LYS C  56     -16.957  76.405  61.801  1.00 89.31           C  
ATOM   2821  CG  LYS C  56     -17.104  76.765  63.256  1.00 93.93           C  
ATOM   2822  CD  LYS C  56     -16.921  75.552  64.157  1.00 96.75           C  
ATOM   2823  CE  LYS C  56     -17.542  75.776  65.514  1.00 99.05           C  
ATOM   2824  NZ  LYS C  56     -17.143  74.717  66.474  1.00100.10           N1+
ATOM   2825  N   ASP C  57     -14.352  77.837  60.902  1.00 90.50           N  
ATOM   2826  CA  ASP C  57     -13.058  78.468  61.245  1.00 90.80           C  
ATOM   2827  C   ASP C  57     -12.392  79.127  60.018  1.00 84.75           C  
ATOM   2828  O   ASP C  57     -11.223  78.894  59.723  1.00 85.04           O  
ATOM   2829  CB  ASP C  57     -12.131  77.480  62.016  1.00 93.84           C  
ATOM   2830  CG  ASP C  57     -11.743  76.243  61.207  1.00 95.98           C  
ATOM   2831  OD1 ASP C  57     -10.886  75.473  61.700  1.00 96.28           O  
ATOM   2832  OD2 ASP C  57     -12.273  76.043  60.091  1.00102.68           O1-
ATOM   2833  N   ARG C  58     -13.166  79.964  59.326  1.00 77.81           N  
ATOM   2834  CA  ARG C  58     -12.684  80.801  58.225  1.00 72.53           C  
ATOM   2835  C   ARG C  58     -12.733  82.249  58.686  1.00 69.46           C  
ATOM   2836  O   ARG C  58     -13.565  82.588  59.536  1.00 71.22           O  
ATOM   2837  CB  ARG C  58     -13.584  80.648  57.010  1.00 72.77           C  
ATOM   2838  CG  ARG C  58     -13.694  79.231  56.479  1.00 74.73           C  
ATOM   2839  CD  ARG C  58     -12.383  78.668  55.955  1.00 76.21           C  
ATOM   2840  NE  ARG C  58     -12.664  78.045  54.677  1.00 76.86           N  
ATOM   2841  CZ  ARG C  58     -12.980  78.667  53.569  1.00 81.36           C  
ATOM   2842  NH1 ARG C  58     -13.268  77.939  52.512  1.00 83.99           N1+
ATOM   2843  NH2 ARG C  58     -12.986  79.979  53.506  1.00 83.90           N  
ATOM   2844  N   PRO C  59     -11.854  83.115  58.137  1.00 65.91           N  
ATOM   2845  CA  PRO C  59     -11.788  84.515  58.614  1.00 64.32           C  
ATOM   2846  C   PRO C  59     -13.080  85.326  58.427  1.00 64.29           C  
ATOM   2847  O   PRO C  59     -13.359  86.226  59.223  1.00 68.17           O  
ATOM   2848  CB  PRO C  59     -10.631  85.119  57.796  1.00 63.36           C  
ATOM   2849  CG  PRO C  59     -10.416  84.190  56.650  1.00 62.97           C  
ATOM   2850  CD  PRO C  59     -10.814  82.829  57.130  1.00 63.95           C  
ATOM   2851  N   PHE C  60     -13.858  84.988  57.403  1.00 63.08           N  
ATOM   2852  CA  PHE C  60     -15.125  85.679  57.104  1.00 62.74           C  
ATOM   2853  C   PHE C  60     -16.356  85.155  57.860  1.00 64.83           C  
ATOM   2854  O   PHE C  60     -17.389  85.826  57.853  1.00 65.70           O  
ATOM   2855  CB  PHE C  60     -15.416  85.655  55.591  1.00 61.49           C  
ATOM   2856  CG  PHE C  60     -15.462  84.270  54.987  1.00 58.36           C  
ATOM   2857  CD1 PHE C  60     -16.561  83.434  55.175  1.00 55.69           C  
ATOM   2858  CD2 PHE C  60     -14.400  83.807  54.217  1.00 56.43           C  
ATOM   2859  CE1 PHE C  60     -16.591  82.166  54.619  1.00 55.62           C  
ATOM   2860  CE2 PHE C  60     -14.434  82.545  53.653  1.00 55.94           C  
ATOM   2861  CZ  PHE C  60     -15.527  81.718  53.854  1.00 55.23           C  
ATOM   2862  N   PHE C  61     -16.248  83.983  58.498  1.00 65.84           N  
ATOM   2863  CA  PHE C  61     -17.409  83.260  59.073  1.00 66.19           C  
ATOM   2864  C   PHE C  61     -18.310  84.076  60.007  1.00 67.26           C  
ATOM   2865  O   PHE C  61     -19.534  83.951  59.944  1.00 68.72           O  
ATOM   2866  CB  PHE C  61     -16.947  81.995  59.805  1.00 65.53           C  
ATOM   2867  CG  PHE C  61     -18.074  81.180  60.393  1.00 64.14           C  
ATOM   2868  CD1 PHE C  61     -18.866  80.376  59.580  1.00 64.52           C  
ATOM   2869  CD2 PHE C  61     -18.350  81.223  61.760  1.00 63.24           C  
ATOM   2870  CE1 PHE C  61     -19.910  79.632  60.118  1.00 64.14           C  
ATOM   2871  CE2 PHE C  61     -19.392  80.481  62.303  1.00 63.32           C  
ATOM   2872  CZ  PHE C  61     -20.173  79.683  61.481  1.00 63.55           C  
ATOM   2873  N   ALA C  62     -17.710  84.903  60.861  1.00 66.77           N  
ATOM   2874  CA  ALA C  62     -18.476  85.802  61.736  1.00 66.06           C  
ATOM   2875  C   ALA C  62     -19.336  86.771  60.931  1.00 64.40           C  
ATOM   2876  O   ALA C  62     -20.539  86.908  61.179  1.00 61.67           O  
ATOM   2877  CB  ALA C  62     -17.539  86.584  62.637  1.00 68.30           C  
ATOM   2878  N   GLY C  63     -18.699  87.434  59.966  1.00 65.26           N  
ATOM   2879  CA  GLY C  63     -19.366  88.396  59.089  1.00 66.83           C  
ATOM   2880  C   GLY C  63     -20.395  87.786  58.153  1.00 65.15           C  
ATOM   2881  O   GLY C  63     -21.392  88.436  57.835  1.00 64.53           O  
ATOM   2882  N   LEU C  64     -20.146  86.548  57.712  1.00 62.08           N  
ATOM   2883  CA  LEU C  64     -21.121  85.760  56.942  1.00 62.64           C  
ATOM   2884  C   LEU C  64     -22.419  85.538  57.734  1.00 65.55           C  
ATOM   2885  O   LEU C  64     -23.514  85.809  57.232  1.00 66.19           O  
ATOM   2886  CB  LEU C  64     -20.529  84.399  56.538  1.00 60.16           C  
ATOM   2887  CG  LEU C  64     -21.438  83.388  55.817  1.00 58.44           C  
ATOM   2888  CD1 LEU C  64     -21.908  83.927  54.476  1.00 57.10           C  
ATOM   2889  CD2 LEU C  64     -20.723  82.058  55.641  1.00 58.75           C  
ATOM   2890  N   VAL C  65     -22.276  85.037  58.963  1.00 65.15           N  
ATOM   2891  CA  VAL C  65     -23.415  84.768  59.852  1.00 65.54           C  
ATOM   2892  C   VAL C  65     -24.211  86.044  60.165  1.00 67.43           C  
ATOM   2893  O   VAL C  65     -25.441  85.998  60.267  1.00 69.29           O  
ATOM   2894  CB  VAL C  65     -22.955  84.051  61.150  1.00 63.93           C  
ATOM   2895  CG1 VAL C  65     -24.066  83.986  62.196  1.00 63.57           C  
ATOM   2896  CG2 VAL C  65     -22.485  82.638  60.823  1.00 62.55           C  
ATOM   2897  N   LYS C  66     -23.512  87.171  60.290  1.00 67.15           N  
ATOM   2898  CA  LYS C  66     -24.151  88.458  60.549  1.00 65.31           C  
ATOM   2899  C   LYS C  66     -24.966  88.932  59.337  1.00 63.33           C  
ATOM   2900  O   LYS C  66     -26.149  89.288  59.462  1.00 62.37           O  
ATOM   2901  CB  LYS C  66     -23.095  89.515  60.904  1.00 65.37           C  
ATOM   2902  CG  LYS C  66     -23.649  90.624  61.779  1.00 67.18           C  
ATOM   2903  CD  LYS C  66     -22.897  91.931  61.621  1.00 67.81           C  
ATOM   2904  CE  LYS C  66     -23.715  93.070  62.204  1.00 70.63           C  
ATOM   2905  NZ  LYS C  66     -22.948  94.340  62.263  1.00 72.62           N1+
ATOM   2906  N   TYR C  67     -24.305  88.941  58.180  1.00 60.84           N  
ATOM   2907  CA  TYR C  67     -24.909  89.286  56.881  1.00 59.95           C  
ATOM   2908  C   TYR C  67     -26.172  88.480  56.589  1.00 58.68           C  
ATOM   2909  O   TYR C  67     -27.184  89.040  56.173  1.00 56.11           O  
ATOM   2910  CB  TYR C  67     -23.847  89.109  55.773  1.00 59.44           C  
ATOM   2911  CG  TYR C  67     -24.303  88.727  54.372  1.00 58.20           C  
ATOM   2912  CD1 TYR C  67     -23.795  87.578  53.757  1.00 57.45           C  
ATOM   2913  CD2 TYR C  67     -25.192  89.525  53.641  1.00 55.69           C  
ATOM   2914  CE1 TYR C  67     -24.176  87.222  52.478  1.00 57.57           C  
ATOM   2915  CE2 TYR C  67     -25.576  89.169  52.352  1.00 55.84           C  
ATOM   2916  CZ  TYR C  67     -25.061  88.016  51.776  1.00 55.96           C  
ATOM   2917  OH  TYR C  67     -25.411  87.634  50.501  1.00 53.37           O  
ATOM   2918  N   MET C  68     -26.101  87.174  56.829  1.00 59.37           N  
ATOM   2919  CA  MET C  68     -27.229  86.271  56.600  1.00 59.97           C  
ATOM   2920  C   MET C  68     -28.357  86.405  57.621  1.00 61.72           C  
ATOM   2921  O   MET C  68     -29.492  86.046  57.321  1.00 64.12           O  
ATOM   2922  CB  MET C  68     -26.745  84.824  56.564  1.00 59.44           C  
ATOM   2923  CG  MET C  68     -25.944  84.485  55.318  1.00 59.00           C  
ATOM   2924  SD  MET C  68     -26.956  84.376  53.833  1.00 56.32           S  
ATOM   2925  CE  MET C  68     -27.905  82.880  54.102  1.00 56.73           C  
ATOM   2926  N   HIS C  69     -28.040  86.898  58.817  1.00 64.47           N  
ATOM   2927  CA  HIS C  69     -29.040  87.200  59.849  1.00 65.66           C  
ATOM   2928  C   HIS C  69     -29.702  88.576  59.644  1.00 62.65           C  
ATOM   2929  O   HIS C  69     -30.820  88.797  60.111  1.00 64.40           O  
ATOM   2930  CB  HIS C  69     -28.379  87.122  61.237  1.00 68.53           C  
ATOM   2931  CG  HIS C  69     -29.341  87.185  62.383  1.00 72.66           C  
ATOM   2932  ND1 HIS C  69     -30.344  86.257  62.566  1.00 77.59           N  
ATOM   2933  CD2 HIS C  69     -29.442  88.055  63.416  1.00 73.14           C  
ATOM   2934  CE1 HIS C  69     -31.028  86.559  63.655  1.00 76.45           C  
ATOM   2935  NE2 HIS C  69     -30.500  87.644  64.191  1.00 74.53           N  
ATOM   2936  N   SER C  70     -29.026  89.473  58.923  1.00 61.70           N  
ATOM   2937  CA  SER C  70     -29.419  90.890  58.823  1.00 61.77           C  
ATOM   2938  C   SER C  70     -30.807  91.157  58.229  1.00 61.70           C  
ATOM   2939  O   SER C  70     -31.480  92.105  58.637  1.00 65.97           O  
ATOM   2940  CB  SER C  70     -28.367  91.687  58.031  1.00 62.03           C  
ATOM   2941  OG  SER C  70     -28.386  91.353  56.655  1.00 60.76           O  
ATOM   2942  N   GLY C  71     -31.214  90.353  57.251  1.00 60.08           N  
ATOM   2943  CA  GLY C  71     -32.550  90.459  56.649  1.00 59.32           C  
ATOM   2944  C   GLY C  71     -33.154  89.086  56.439  1.00 59.07           C  
ATOM   2945  O   GLY C  71     -32.538  88.082  56.788  1.00 60.07           O  
ATOM   2946  N   PRO C  72     -34.363  89.026  55.864  1.00 58.29           N  
ATOM   2947  CA  PRO C  72     -34.961  87.732  55.537  1.00 58.28           C  
ATOM   2948  C   PRO C  72     -34.390  87.088  54.286  1.00 55.47           C  
ATOM   2949  O   PRO C  72     -33.851  87.779  53.424  1.00 55.34           O  
ATOM   2950  CB  PRO C  72     -36.424  88.076  55.285  1.00 60.83           C  
ATOM   2951  CG  PRO C  72     -36.396  89.478  54.811  1.00 61.10           C  
ATOM   2952  CD  PRO C  72     -35.279  90.141  55.570  1.00 60.89           C  
ATOM   2953  N   VAL C  73     -34.558  85.772  54.198  1.00 54.65           N  
ATOM   2954  CA  VAL C  73     -34.141  84.974  53.043  1.00 53.53           C  
ATOM   2955  C   VAL C  73     -35.332  84.206  52.485  1.00 53.58           C  
ATOM   2956  O   VAL C  73     -36.280  83.903  53.218  1.00 54.99           O  
ATOM   2957  CB  VAL C  73     -33.005  83.977  53.393  1.00 52.86           C  
ATOM   2958  CG1 VAL C  73     -31.766  84.732  53.839  1.00 53.57           C  
ATOM   2959  CG2 VAL C  73     -33.416  82.963  54.460  1.00 53.10           C  
ATOM   2960  N   VAL C  74     -35.287  83.909  51.190  1.00 51.79           N  
ATOM   2961  CA  VAL C  74     -36.242  82.999  50.576  1.00 50.18           C  
ATOM   2962  C   VAL C  74     -35.562  81.636  50.517  1.00 51.51           C  
ATOM   2963  O   VAL C  74     -34.639  81.434  49.731  1.00 52.88           O  
ATOM   2964  CB  VAL C  74     -36.664  83.446  49.168  1.00 49.23           C  
ATOM   2965  CG1 VAL C  74     -37.735  82.520  48.618  1.00 48.88           C  
ATOM   2966  CG2 VAL C  74     -37.188  84.874  49.187  1.00 49.27           C  
ATOM   2967  N   ALA C  75     -36.002  80.720  51.375  1.00 51.36           N  
ATOM   2968  CA  ALA C  75     -35.533  79.338  51.357  1.00 51.42           C  
ATOM   2969  C   ALA C  75     -36.387  78.545  50.367  1.00 51.25           C  
ATOM   2970  O   ALA C  75     -37.607  78.711  50.338  1.00 48.25           O  
ATOM   2971  CB  ALA C  75     -35.629  78.729  52.745  1.00 51.31           C  
ATOM   2972  N   MET C  76     -35.742  77.688  49.570  1.00 50.81           N  
ATOM   2973  CA  MET C  76     -36.415  76.911  48.521  1.00 49.33           C  
ATOM   2974  C   MET C  76     -35.874  75.486  48.405  1.00 48.16           C  
ATOM   2975  O   MET C  76     -34.744  75.204  48.795  1.00 47.18           O  
ATOM   2976  CB  MET C  76     -36.238  77.586  47.157  1.00 49.64           C  
ATOM   2977  CG  MET C  76     -36.609  79.051  47.114  1.00 50.12           C  
ATOM   2978  SD  MET C  76     -36.673  79.663  45.425  1.00 50.47           S  
ATOM   2979  CE  MET C  76     -34.945  79.999  45.133  1.00 50.31           C  
ATOM   2980  N   VAL C  77     -36.692  74.606  47.831  1.00 47.66           N  
ATOM   2981  CA  VAL C  77     -36.287  73.242  47.476  1.00 46.92           C  
ATOM   2982  C   VAL C  77     -36.800  72.963  46.063  1.00 47.46           C  
ATOM   2983  O   VAL C  77     -37.994  73.119  45.796  1.00 46.28           O  
ATOM   2984  CB  VAL C  77     -36.857  72.191  48.455  1.00 46.95           C  
ATOM   2985  CG1 VAL C  77     -36.431  70.780  48.068  1.00 47.54           C  
ATOM   2986  CG2 VAL C  77     -36.412  72.486  49.878  1.00 46.68           C  
ATOM   2987  N   TRP C  78     -35.891  72.556  45.173  1.00 47.44           N  
ATOM   2988  CA  TRP C  78     -36.206  72.275  43.766  1.00 47.08           C  
ATOM   2989  C   TRP C  78     -35.866  70.827  43.426  1.00 47.83           C  
ATOM   2990  O   TRP C  78     -34.875  70.296  43.918  1.00 51.12           O  
ATOM   2991  CB  TRP C  78     -35.424  73.219  42.847  1.00 45.37           C  
ATOM   2992  CG  TRP C  78     -35.884  74.631  42.920  1.00 42.84           C  
ATOM   2993  CD1 TRP C  78     -35.440  75.597  43.770  1.00 42.55           C  
ATOM   2994  CD2 TRP C  78     -36.898  75.231  42.122  1.00 42.16           C  
ATOM   2995  NE1 TRP C  78     -36.115  76.770  43.551  1.00 43.18           N  
ATOM   2996  CE2 TRP C  78     -37.017  76.576  42.541  1.00 42.28           C  
ATOM   2997  CE3 TRP C  78     -37.720  74.766  41.089  1.00 42.24           C  
ATOM   2998  CZ2 TRP C  78     -37.921  77.465  41.960  1.00 42.08           C  
ATOM   2999  CZ3 TRP C  78     -38.621  75.649  40.509  1.00 42.86           C  
ATOM   3000  CH2 TRP C  78     -38.715  76.987  40.949  1.00 43.08           C  
ATOM   3001  N   GLU C  79     -36.682  70.205  42.578  1.00 49.34           N  
ATOM   3002  CA  GLU C  79     -36.512  68.805  42.202  1.00 50.53           C  
ATOM   3003  C   GLU C  79     -36.221  68.617  40.713  1.00 49.85           C  
ATOM   3004  O   GLU C  79     -36.808  69.293  39.867  1.00 48.24           O  
ATOM   3005  CB  GLU C  79     -37.763  68.009  42.571  1.00 54.55           C  
ATOM   3006  CG  GLU C  79     -37.915  66.702  41.801  1.00 59.07           C  
ATOM   3007  CD  GLU C  79     -39.111  65.899  42.239  1.00 61.38           C  
ATOM   3008  OE1 GLU C  79     -40.048  65.760  41.422  1.00 64.15           O  
ATOM   3009  OE2 GLU C  79     -39.118  65.422  43.394  1.00 60.45           O1-
ATOM   3010  N   GLY C  80     -35.337  67.663  40.411  1.00 50.39           N  
ATOM   3011  CA  GLY C  80     -35.121  67.191  39.038  1.00 51.48           C  
ATOM   3012  C   GLY C  80     -33.785  66.499  38.822  1.00 51.84           C  
ATOM   3013  O   GLY C  80     -32.946  66.458  39.719  1.00 50.98           O  
ATOM   3014  N   LEU C  81     -33.593  65.969  37.612  1.00 50.87           N  
ATOM   3015  CA  LEU C  81     -32.357  65.278  37.235  1.00 49.63           C  
ATOM   3016  C   LEU C  81     -31.146  66.186  37.391  1.00 48.57           C  
ATOM   3017  O   LEU C  81     -31.056  67.229  36.737  1.00 48.29           O  
ATOM   3018  CB  LEU C  81     -32.434  64.784  35.784  1.00 51.92           C  
ATOM   3019  CG  LEU C  81     -31.249  63.971  35.239  1.00 52.15           C  
ATOM   3020  CD1 LEU C  81     -31.208  62.591  35.878  1.00 52.73           C  
ATOM   3021  CD2 LEU C  81     -31.321  63.856  33.723  1.00 50.69           C  
ATOM   3022  N   ASN C  82     -30.216  65.771  38.249  1.00 49.95           N  
ATOM   3023  CA  ASN C  82     -28.984  66.518  38.532  1.00 51.63           C  
ATOM   3024  C   ASN C  82     -29.253  67.967  38.920  1.00 51.55           C  
ATOM   3025  O   ASN C  82     -28.521  68.878  38.524  1.00 51.59           O  
ATOM   3026  CB  ASN C  82     -28.024  66.445  37.336  1.00 53.14           C  
ATOM   3027  CG  ASN C  82     -27.446  65.062  37.144  1.00 54.07           C  
ATOM   3028  OD1 ASN C  82     -26.761  64.537  38.026  1.00 53.53           O  
ATOM   3029  ND2 ASN C  82     -27.692  64.476  35.979  1.00 53.92           N  
ATOM   3030  N   VAL C  83     -30.313  68.171  39.696  1.00 50.80           N  
ATOM   3031  CA  VAL C  83     -30.686  69.509  40.118  1.00 51.33           C  
ATOM   3032  C   VAL C  83     -29.613  70.151  40.998  1.00 50.93           C  
ATOM   3033  O   VAL C  83     -29.426  71.363  40.945  1.00 54.41           O  
ATOM   3034  CB  VAL C  83     -32.074  69.539  40.801  1.00 53.21           C  
ATOM   3035  CG1 VAL C  83     -32.065  68.903  42.220  1.00 53.79           C  
ATOM   3036  CG2 VAL C  83     -32.583  70.959  40.860  1.00 55.33           C  
ATOM   3037  N   VAL C  84     -28.889  69.346  41.772  1.00 52.34           N  
ATOM   3038  CA  VAL C  84     -27.812  69.860  42.632  1.00 52.53           C  
ATOM   3039  C   VAL C  84     -26.666  70.407  41.785  1.00 52.99           C  
ATOM   3040  O   VAL C  84     -26.227  71.540  41.983  1.00 49.95           O  
ATOM   3041  CB  VAL C  84     -27.276  68.776  43.601  1.00 51.44           C  
ATOM   3042  CG1 VAL C  84     -26.086  69.288  44.393  1.00 49.82           C  
ATOM   3043  CG2 VAL C  84     -28.363  68.328  44.571  1.00 52.15           C  
ATOM   3044  N   LYS C  85     -26.186  69.590  40.849  1.00 57.05           N  
ATOM   3045  CA  LYS C  85     -25.066  69.971  39.989  1.00 60.80           C  
ATOM   3046  C   LYS C  85     -25.460  71.095  39.030  1.00 57.50           C  
ATOM   3047  O   LYS C  85     -24.756  72.097  38.943  1.00 55.01           O  
ATOM   3048  CB  LYS C  85     -24.528  68.765  39.203  1.00 67.47           C  
ATOM   3049  CG  LYS C  85     -23.170  69.020  38.558  1.00 77.72           C  
ATOM   3050  CD  LYS C  85     -22.799  67.954  37.536  1.00 84.70           C  
ATOM   3051  CE  LYS C  85     -21.504  68.323  36.819  1.00 87.53           C  
ATOM   3052  NZ  LYS C  85     -20.979  67.217  35.972  1.00 86.90           N1+
ATOM   3053  N   THR C  86     -26.565  70.907  38.308  1.00 54.20           N  
ATOM   3054  CA  THR C  86     -27.053  71.899  37.347  1.00 51.39           C  
ATOM   3055  C   THR C  86     -27.471  73.198  38.042  1.00 49.83           C  
ATOM   3056  O   THR C  86     -27.244  74.286  37.510  1.00 47.90           O  
ATOM   3057  CB  THR C  86     -28.239  71.370  36.520  1.00 51.16           C  
ATOM   3058  OG1 THR C  86     -27.991  70.019  36.117  1.00 51.58           O  
ATOM   3059  CG2 THR C  86     -28.450  72.220  35.277  1.00 51.99           C  
ATOM   3060  N   GLY C  87     -28.054  73.077  39.231  1.00 48.10           N  
ATOM   3061  CA  GLY C  87     -28.398  74.234  40.056  1.00 49.60           C  
ATOM   3062  C   GLY C  87     -27.187  75.072  40.402  1.00 50.97           C  
ATOM   3063  O   GLY C  87     -27.200  76.287  40.247  1.00 53.65           O  
ATOM   3064  N   ARG C  88     -26.128  74.406  40.847  1.00 53.79           N  
ATOM   3065  CA  ARG C  88     -24.828  75.054  41.070  1.00 52.78           C  
ATOM   3066  C   ARG C  88     -24.282  75.776  39.835  1.00 49.83           C  
ATOM   3067  O   ARG C  88     -23.752  76.876  39.951  1.00 47.23           O  
ATOM   3068  CB  ARG C  88     -23.798  74.033  41.569  1.00 55.70           C  
ATOM   3069  CG  ARG C  88     -23.764  73.912  43.095  1.00 58.27           C  
ATOM   3070  CD  ARG C  88     -22.646  74.775  43.638  1.00 62.10           C  
ATOM   3071  NE  ARG C  88     -22.657  74.896  45.102  1.00 65.39           N  
ATOM   3072  CZ  ARG C  88     -21.702  75.471  45.834  1.00 65.91           C  
ATOM   3073  NH1 ARG C  88     -20.628  75.997  45.254  1.00 70.81           N1+
ATOM   3074  NH2 ARG C  88     -21.816  75.523  47.161  1.00 64.02           N  
ATOM   3075  N   VAL C  89     -24.412  75.147  38.666  1.00 49.59           N  
ATOM   3076  CA  VAL C  89     -23.974  75.737  37.391  1.00 49.20           C  
ATOM   3077  C   VAL C  89     -24.769  77.007  37.074  1.00 48.27           C  
ATOM   3078  O   VAL C  89     -24.186  78.021  36.694  1.00 49.60           O  
ATOM   3079  CB  VAL C  89     -24.063  74.716  36.221  1.00 48.93           C  
ATOM   3080  CG1 VAL C  89     -23.840  75.379  34.866  1.00 49.76           C  
ATOM   3081  CG2 VAL C  89     -23.038  73.609  36.408  1.00 49.64           C  
ATOM   3082  N   MET C  90     -26.089  76.943  37.240  1.00 47.78           N  
ATOM   3083  CA  MET C  90     -26.979  78.102  37.024  1.00 47.59           C  
ATOM   3084  C   MET C  90     -26.683  79.272  37.958  1.00 45.22           C  
ATOM   3085  O   MET C  90     -26.771  80.424  37.551  1.00 43.32           O  
ATOM   3086  CB  MET C  90     -28.449  77.704  37.200  1.00 48.87           C  
ATOM   3087  CG  MET C  90     -29.003  76.822  36.091  1.00 49.62           C  
ATOM   3088  SD  MET C  90     -30.550  76.021  36.560  1.00 50.45           S  
ATOM   3089  CE  MET C  90     -31.553  77.425  37.050  1.00 49.21           C  
ATOM   3090  N   LEU C  91     -26.365  78.962  39.211  1.00 45.75           N  
ATOM   3091  CA  LEU C  91     -25.927  79.973  40.172  1.00 47.22           C  
ATOM   3092  C   LEU C  91     -24.624  80.653  39.733  1.00 47.61           C  
ATOM   3093  O   LEU C  91     -24.467  81.872  39.899  1.00 47.06           O  
ATOM   3094  CB  LEU C  91     -25.752  79.368  41.577  1.00 47.62           C  
ATOM   3095  CG  LEU C  91     -26.955  79.468  42.515  1.00 47.04           C  
ATOM   3096  CD1 LEU C  91     -28.209  78.828  41.937  1.00 46.65           C  
ATOM   3097  CD2 LEU C  91     -26.607  78.848  43.859  1.00 46.16           C  
ATOM   3098  N   GLY C  92     -23.708  79.861  39.176  1.00 46.85           N  
ATOM   3099  CA  GLY C  92     -22.381  80.335  38.804  1.00 48.13           C  
ATOM   3100  C   GLY C  92     -21.439  80.138  39.975  1.00 48.90           C  
ATOM   3101  O   GLY C  92     -21.834  79.614  41.015  1.00 46.74           O  
ATOM   3102  N   GLU C  93     -20.194  80.570  39.810  1.00 51.02           N  
ATOM   3103  CA  GLU C  93     -19.160  80.369  40.837  1.00 53.15           C  
ATOM   3104  C   GLU C  93     -19.492  81.181  42.086  1.00 51.43           C  
ATOM   3105  O   GLU C  93     -20.073  82.256  41.978  1.00 53.75           O  
ATOM   3106  CB  GLU C  93     -17.773  80.773  40.316  1.00 55.74           C  
ATOM   3107  CG  GLU C  93     -17.293  80.033  39.069  1.00 57.33           C  
ATOM   3108  CD  GLU C  93     -17.251  78.516  39.230  1.00 59.86           C  
ATOM   3109  OE1 GLU C  93     -17.476  77.808  38.226  1.00 61.18           O  
ATOM   3110  OE2 GLU C  93     -16.989  78.031  40.349  1.00 60.39           O1-
ATOM   3111  N   THR C  94     -19.119  80.660  43.256  1.00 49.53           N  
ATOM   3112  CA  THR C  94     -19.452  81.284  44.544  1.00 49.20           C  
ATOM   3113  C   THR C  94     -18.945  82.720  44.619  1.00 50.84           C  
ATOM   3114  O   THR C  94     -19.658  83.603  45.087  1.00 48.35           O  
ATOM   3115  CB  THR C  94     -18.906  80.461  45.731  1.00 49.48           C  
ATOM   3116  OG1 THR C  94     -19.361  79.109  45.617  1.00 49.00           O  
ATOM   3117  CG2 THR C  94     -19.378  81.020  47.067  1.00 48.69           C  
ATOM   3118  N   ASN C  95     -17.719  82.941  44.148  1.00 54.31           N  
ATOM   3119  CA  ASN C  95     -17.207  84.288  43.937  1.00 56.04           C  
ATOM   3120  C   ASN C  95     -17.784  84.822  42.626  1.00 57.23           C  
ATOM   3121  O   ASN C  95     -17.560  84.218  41.573  1.00 55.78           O  
ATOM   3122  CB  ASN C  95     -15.685  84.285  43.858  1.00 59.16           C  
ATOM   3123  CG  ASN C  95     -15.091  85.683  43.953  1.00 60.62           C  
ATOM   3124  OD1 ASN C  95     -15.730  86.685  43.620  1.00 62.53           O  
ATOM   3125  ND2 ASN C  95     -13.852  85.753  44.390  1.00 62.11           N  
ATOM   3126  N   PRO C  96     -18.525  85.952  42.675  1.00 58.49           N  
ATOM   3127  CA  PRO C  96     -19.089  86.515  41.438  1.00 58.39           C  
ATOM   3128  C   PRO C  96     -18.036  86.987  40.434  1.00 58.00           C  
ATOM   3129  O   PRO C  96     -18.331  87.062  39.243  1.00 60.50           O  
ATOM   3130  CB  PRO C  96     -19.943  87.694  41.931  1.00 58.93           C  
ATOM   3131  CG  PRO C  96     -20.184  87.439  43.375  1.00 60.95           C  
ATOM   3132  CD  PRO C  96     -18.979  86.697  43.863  1.00 60.12           C  
ATOM   3133  N   ALA C  97     -16.833  87.301  40.914  1.00 57.08           N  
ATOM   3134  CA  ALA C  97     -15.693  87.619  40.048  1.00 55.78           C  
ATOM   3135  C   ALA C  97     -15.409  86.519  39.021  1.00 54.21           C  
ATOM   3136  O   ALA C  97     -15.064  86.819  37.882  1.00 55.42           O  
ATOM   3137  CB  ALA C  97     -14.451  87.890  40.887  1.00 54.97           C  
ATOM   3138  N   ASP C  98     -15.592  85.264  39.421  1.00 55.32           N  
ATOM   3139  CA  ASP C  98     -15.407  84.111  38.528  1.00 57.60           C  
ATOM   3140  C   ASP C  98     -16.665  83.712  37.743  1.00 56.86           C  
ATOM   3141  O   ASP C  98     -16.564  82.993  36.748  1.00 56.60           O  
ATOM   3142  CB  ASP C  98     -14.940  82.894  39.327  1.00 58.95           C  
ATOM   3143  CG  ASP C  98     -13.690  83.163  40.136  1.00 62.07           C  
ATOM   3144  OD1 ASP C  98     -13.607  82.671  41.281  1.00 62.45           O  
ATOM   3145  OD2 ASP C  98     -12.788  83.888  39.648  1.00 66.32           O1-
ATOM   3146  N   SER C  99     -17.834  84.175  38.184  1.00 55.81           N  
ATOM   3147  CA  SER C  99     -19.104  83.782  37.587  1.00 54.70           C  
ATOM   3148  C   SER C  99     -19.266  84.295  36.164  1.00 55.01           C  
ATOM   3149  O   SER C  99     -18.942  85.438  35.874  1.00 56.29           O  
ATOM   3150  CB  SER C  99     -20.278  84.276  38.439  1.00 55.96           C  
ATOM   3151  OG  SER C  99     -20.326  83.582  39.673  1.00 55.92           O  
ATOM   3152  N   LYS C 100     -19.800  83.441  35.294  1.00 55.61           N  
ATOM   3153  CA  LYS C 100     -19.987  83.764  33.882  1.00 54.76           C  
ATOM   3154  C   LYS C 100     -21.293  84.512  33.659  1.00 51.16           C  
ATOM   3155  O   LYS C 100     -22.280  84.241  34.338  1.00 50.90           O  
ATOM   3156  CB  LYS C 100     -20.033  82.481  33.042  1.00 55.68           C  
ATOM   3157  CG  LYS C 100     -18.823  81.579  33.168  1.00 57.41           C  
ATOM   3158  CD  LYS C 100     -17.548  82.289  32.758  1.00 59.12           C  
ATOM   3159  CE  LYS C 100     -16.379  81.331  32.719  1.00 60.77           C  
ATOM   3160  NZ  LYS C 100     -15.115  82.105  32.661  1.00 66.01           N1+
ATOM   3161  N   PRO C 101     -21.319  85.437  32.685  1.00 47.98           N  
ATOM   3162  CA  PRO C 101     -22.601  85.961  32.218  1.00 48.74           C  
ATOM   3163  C   PRO C 101     -23.530  84.835  31.770  1.00 48.05           C  
ATOM   3164  O   PRO C 101     -23.076  83.857  31.165  1.00 47.57           O  
ATOM   3165  CB  PRO C 101     -22.208  86.850  31.041  1.00 48.66           C  
ATOM   3166  CG  PRO C 101     -20.851  87.327  31.414  1.00 49.22           C  
ATOM   3167  CD  PRO C 101     -20.191  86.157  32.081  1.00 48.07           C  
ATOM   3168  N   GLY C 102     -24.813  84.980  32.090  1.00 46.52           N  
ATOM   3169  CA  GLY C 102     -25.800  83.907  31.944  1.00 47.20           C  
ATOM   3170  C   GLY C 102     -26.180  83.261  33.266  1.00 45.91           C  
ATOM   3171  O   GLY C 102     -27.299  82.787  33.414  1.00 45.60           O  
ATOM   3172  N   THR C 103     -25.245  83.228  34.217  1.00 45.58           N  
ATOM   3173  CA  THR C 103     -25.496  82.689  35.554  1.00 45.03           C  
ATOM   3174  C   THR C 103     -26.110  83.765  36.454  1.00 43.91           C  
ATOM   3175  O   THR C 103     -25.976  84.957  36.180  1.00 41.80           O  
ATOM   3176  CB  THR C 103     -24.203  82.160  36.217  1.00 46.44           C  
ATOM   3177  OG1 THR C 103     -23.281  83.238  36.431  1.00 45.85           O  
ATOM   3178  CG2 THR C 103     -23.533  81.085  35.358  1.00 47.00           C  
ATOM   3179  N   ILE C 104     -26.767  83.329  37.531  1.00 42.81           N  
ATOM   3180  CA  ILE C 104     -27.470  84.236  38.447  1.00 42.23           C  
ATOM   3181  C   ILE C 104     -26.498  85.233  39.086  1.00 42.61           C  
ATOM   3182  O   ILE C 104     -26.710  86.443  39.016  1.00 42.58           O  
ATOM   3183  CB  ILE C 104     -28.276  83.457  39.521  1.00 41.31           C  
ATOM   3184  CG1 ILE C 104     -29.477  82.762  38.866  1.00 41.14           C  
ATOM   3185  CG2 ILE C 104     -28.764  84.382  40.633  1.00 40.86           C  
ATOM   3186  CD1 ILE C 104     -30.115  81.670  39.697  1.00 41.48           C  
ATOM   3187  N   ARG C 105     -25.439  84.723  39.701  1.00 42.68           N  
ATOM   3188  CA  ARG C 105     -24.416  85.592  40.292  1.00 42.33           C  
ATOM   3189  C   ARG C 105     -23.695  86.413  39.226  1.00 40.59           C  
ATOM   3190  O   ARG C 105     -23.381  87.576  39.447  1.00 39.83           O  
ATOM   3191  CB  ARG C 105     -23.407  84.781  41.111  1.00 43.29           C  
ATOM   3192  CG  ARG C 105     -23.987  84.146  42.373  1.00 44.93           C  
ATOM   3193  CD  ARG C 105     -22.864  83.678  43.285  1.00 46.04           C  
ATOM   3194  NE  ARG C 105     -23.324  82.860  44.410  1.00 43.47           N  
ATOM   3195  CZ  ARG C 105     -23.304  81.527  44.466  1.00 44.37           C  
ATOM   3196  NH1 ARG C 105     -22.854  80.783  43.454  1.00 46.92           N1+
ATOM   3197  NH2 ARG C 105     -23.743  80.913  45.563  1.00 44.94           N  
ATOM   3198  N   GLY C 106     -23.436  85.802  38.073  1.00 41.02           N  
ATOM   3199  CA  GLY C 106     -22.757  86.477  36.972  1.00 40.91           C  
ATOM   3200  C   GLY C 106     -23.550  87.651  36.436  1.00 41.37           C  
ATOM   3201  O   GLY C 106     -22.979  88.689  36.107  1.00 41.73           O  
ATOM   3202  N   ASP C 107     -24.868  87.490  36.364  1.00 41.78           N  
ATOM   3203  CA  ASP C 107     -25.751  88.551  35.888  1.00 41.83           C  
ATOM   3204  C   ASP C 107     -26.061  89.616  36.938  1.00 42.73           C  
ATOM   3205  O   ASP C 107     -26.213  90.785  36.574  1.00 46.02           O  
ATOM   3206  CB  ASP C 107     -27.067  87.965  35.350  1.00 42.84           C  
ATOM   3207  CG  ASP C 107     -26.889  87.215  34.030  1.00 45.76           C  
ATOM   3208  OD1 ASP C 107     -25.913  87.489  33.282  1.00 50.77           O  
ATOM   3209  OD2 ASP C 107     -27.735  86.343  33.720  1.00 45.35           O1-
ATOM   3210  N   PHE C 108     -26.151  89.234  38.218  1.00 42.14           N  
ATOM   3211  CA  PHE C 108     -26.808  90.080  39.233  1.00 41.83           C  
ATOM   3212  C   PHE C 108     -25.997  90.561  40.446  1.00 41.21           C  
ATOM   3213  O   PHE C 108     -26.544  91.285  41.278  1.00 40.87           O  
ATOM   3214  CB  PHE C 108     -28.099  89.387  39.724  1.00 42.93           C  
ATOM   3215  CG  PHE C 108     -29.139  89.205  38.647  1.00 43.06           C  
ATOM   3216  CD1 PHE C 108     -29.680  90.312  37.989  1.00 43.42           C  
ATOM   3217  CD2 PHE C 108     -29.588  87.939  38.295  1.00 42.32           C  
ATOM   3218  CE1 PHE C 108     -30.626  90.156  36.994  1.00 42.65           C  
ATOM   3219  CE2 PHE C 108     -30.539  87.779  37.300  1.00 42.86           C  
ATOM   3220  CZ  PHE C 108     -31.053  88.887  36.647  1.00 42.97           C  
ATOM   3221  N   CYS C 109     -24.723  90.198  40.571  1.00 41.57           N  
ATOM   3222  CA  CYS C 109     -23.941  90.645  41.738  1.00 43.52           C  
ATOM   3223  C   CYS C 109     -22.436  90.705  41.473  1.00 44.63           C  
ATOM   3224  O   CYS C 109     -21.953  90.150  40.493  1.00 42.52           O  
ATOM   3225  CB  CYS C 109     -24.248  89.766  42.958  1.00 44.20           C  
ATOM   3226  SG  CYS C 109     -23.659  88.066  42.833  1.00 46.18           S  
ATOM   3227  N   ILE C 110     -21.715  91.372  42.379  1.00 47.37           N  
ATOM   3228  CA  ILE C 110     -20.322  91.798  42.160  1.00 50.33           C  
ATOM   3229  C   ILE C 110     -19.316  91.216  43.169  1.00 53.95           C  
ATOM   3230  O   ILE C 110     -18.302  90.641  42.770  1.00 52.73           O  
ATOM   3231  CB  ILE C 110     -20.234  93.342  42.181  1.00 51.63           C  
ATOM   3232  CG1 ILE C 110     -20.987  93.923  40.982  1.00 52.63           C  
ATOM   3233  CG2 ILE C 110     -18.786  93.818  42.150  1.00 53.23           C  
ATOM   3234  CD1 ILE C 110     -21.323  95.395  41.107  1.00 54.32           C  
ATOM   3235  N   GLN C 111     -19.582  91.403  44.462  1.00 59.53           N  
ATOM   3236  CA  GLN C 111     -18.645  91.020  45.528  1.00 62.57           C  
ATOM   3237  C   GLN C 111     -19.041  89.693  46.178  1.00 59.83           C  
ATOM   3238  O   GLN C 111     -20.229  89.407  46.335  1.00 60.57           O  
ATOM   3239  CB  GLN C 111     -18.594  92.117  46.594  1.00 65.99           C  
ATOM   3240  CG  GLN C 111     -17.355  92.073  47.473  1.00 69.37           C  
ATOM   3241  CD  GLN C 111     -17.500  92.936  48.713  1.00 71.50           C  
ATOM   3242  OE1 GLN C 111     -18.293  92.621  49.605  1.00 73.24           O  
ATOM   3243  NE2 GLN C 111     -16.735  94.023  48.783  1.00 71.96           N  
ATOM   3244  N   VAL C 112     -18.041  88.902  46.567  1.00 56.94           N  
ATOM   3245  CA  VAL C 112     -18.271  87.590  47.196  1.00 55.53           C  
ATOM   3246  C   VAL C 112     -19.067  87.683  48.506  1.00 55.63           C  
ATOM   3247  O   VAL C 112     -19.905  86.826  48.783  1.00 53.88           O  
ATOM   3248  CB  VAL C 112     -16.945  86.803  47.390  1.00 54.82           C  
ATOM   3249  CG1 VAL C 112     -16.049  87.446  48.450  1.00 55.67           C  
ATOM   3250  CG2 VAL C 112     -17.219  85.340  47.722  1.00 53.47           C  
ATOM   3251  N   GLY C 113     -18.816  88.731  49.291  1.00 57.06           N  
ATOM   3252  CA  GLY C 113     -19.541  88.970  50.547  1.00 55.05           C  
ATOM   3253  C   GLY C 113     -21.026  89.285  50.411  1.00 52.44           C  
ATOM   3254  O   GLY C 113     -21.781  89.118  51.371  1.00 50.99           O  
ATOM   3255  N   ARG C 114     -21.435  89.749  49.229  1.00 50.17           N  
ATOM   3256  CA  ARG C 114     -22.837  90.000  48.906  1.00 50.66           C  
ATOM   3257  C   ARG C 114     -23.197  89.292  47.599  1.00 50.91           C  
ATOM   3258  O   ARG C 114     -23.416  89.943  46.573  1.00 49.84           O  
ATOM   3259  CB  ARG C 114     -23.068  91.501  48.765  1.00 51.13           C  
ATOM   3260  CG  ARG C 114     -22.787  92.313  50.020  1.00 52.88           C  
ATOM   3261  CD  ARG C 114     -23.893  92.169  51.052  1.00 53.65           C  
ATOM   3262  NE  ARG C 114     -23.589  92.912  52.277  1.00 55.44           N  
ATOM   3263  CZ  ARG C 114     -22.815  92.482  53.280  1.00 55.84           C  
ATOM   3264  NH1 ARG C 114     -22.232  91.281  53.256  1.00 56.42           N1+
ATOM   3265  NH2 ARG C 114     -22.624  93.268  54.335  1.00 57.28           N  
ATOM   3266  N   ASN C 115     -23.259  87.959  47.646  1.00 50.16           N  
ATOM   3267  CA  ASN C 115     -23.436  87.137  46.436  1.00 48.79           C  
ATOM   3268  C   ASN C 115     -24.836  86.487  46.284  1.00 49.80           C  
ATOM   3269  O   ASN C 115     -24.968  85.392  45.715  1.00 50.66           O  
ATOM   3270  CB  ASN C 115     -22.305  86.102  46.327  1.00 47.62           C  
ATOM   3271  CG  ASN C 115     -22.383  85.023  47.387  1.00 47.11           C  
ATOM   3272  OD1 ASN C 115     -23.012  85.208  48.426  1.00 45.10           O  
ATOM   3273  ND2 ASN C 115     -21.728  83.889  47.134  1.00 46.63           N  
ATOM   3274  N   ILE C 116     -25.860  87.168  46.812  1.00 48.79           N  
ATOM   3275  CA  ILE C 116     -27.311  86.970  46.514  1.00 47.22           C  
ATOM   3276  C   ILE C 116     -27.998  85.593  46.625  1.00 44.36           C  
ATOM   3277  O   ILE C 116     -29.218  85.554  46.767  1.00 43.04           O  
ATOM   3278  CB  ILE C 116     -27.731  87.603  45.148  1.00 50.06           C  
ATOM   3279  CG1 ILE C 116     -27.049  86.911  43.956  1.00 51.89           C  
ATOM   3280  CG2 ILE C 116     -27.445  89.102  45.143  1.00 51.18           C  
ATOM   3281  CD1 ILE C 116     -27.698  87.195  42.617  1.00 53.22           C  
ATOM   3282  N   ILE C 117     -27.260  84.487  46.564  1.00 42.57           N  
ATOM   3283  CA  ILE C 117     -27.879  83.160  46.487  1.00 42.63           C  
ATOM   3284  C   ILE C 117     -26.952  82.053  47.014  1.00 44.43           C  
ATOM   3285  O   ILE C 117     -25.727  82.175  46.916  1.00 45.28           O  
ATOM   3286  CB  ILE C 117     -28.329  82.871  45.036  1.00 42.64           C  
ATOM   3287  CG1 ILE C 117     -29.157  81.589  44.954  1.00 43.27           C  
ATOM   3288  CG2 ILE C 117     -27.133  82.822  44.089  1.00 43.27           C  
ATOM   3289  CD1 ILE C 117     -29.984  81.499  43.693  1.00 43.92           C  
ATOM   3290  N   HIS C 118     -27.544  81.016  47.619  1.00 45.23           N  
ATOM   3291  CA  HIS C 118     -26.840  79.788  47.998  1.00 45.80           C  
ATOM   3292  C   HIS C 118     -27.474  78.591  47.291  1.00 45.89           C  
ATOM   3293  O   HIS C 118     -28.691  78.523  47.160  1.00 46.00           O  
ATOM   3294  CB  HIS C 118     -26.886  79.547  49.516  1.00 46.88           C  
ATOM   3295  CG  HIS C 118     -26.531  78.143  49.910  1.00 48.87           C  
ATOM   3296  ND1 HIS C 118     -25.234  77.731  50.132  1.00 49.16           N  
ATOM   3297  CD2 HIS C 118     -27.305  77.041  50.065  1.00 51.05           C  
ATOM   3298  CE1 HIS C 118     -25.227  76.442  50.427  1.00 52.02           C  
ATOM   3299  NE2 HIS C 118     -26.471  75.998  50.388  1.00 52.89           N  
ATOM   3300  N   GLY C 119     -26.635  77.648  46.868  1.00 46.53           N  
ATOM   3301  CA  GLY C 119     -27.075  76.334  46.400  1.00 48.50           C  
ATOM   3302  C   GLY C 119     -26.273  75.227  47.071  1.00 51.10           C  
ATOM   3303  O   GLY C 119     -25.114  75.431  47.443  1.00 52.93           O  
ATOM   3304  N   SER C 120     -26.883  74.054  47.225  1.00 51.48           N  
ATOM   3305  CA  SER C 120     -26.197  72.894  47.812  1.00 52.62           C  
ATOM   3306  C   SER C 120     -25.080  72.396  46.901  1.00 51.79           C  
ATOM   3307  O   SER C 120     -25.273  72.303  45.690  1.00 50.27           O  
ATOM   3308  CB  SER C 120     -27.184  71.754  48.063  1.00 51.13           C  
ATOM   3309  OG  SER C 120     -28.263  72.199  48.854  1.00 49.08           O  
ATOM   3310  N   ASP C 121     -23.923  72.090  47.490  1.00 54.58           N  
ATOM   3311  CA  ASP C 121     -22.750  71.614  46.724  1.00 59.03           C  
ATOM   3312  C   ASP C 121     -22.805  70.134  46.326  1.00 59.69           C  
ATOM   3313  O   ASP C 121     -22.128  69.730  45.381  1.00 59.95           O  
ATOM   3314  CB  ASP C 121     -21.419  71.923  47.448  1.00 60.41           C  
ATOM   3315  CG  ASP C 121     -21.289  71.240  48.810  1.00 62.45           C  
ATOM   3316  OD1 ASP C 121     -20.451  71.701  49.610  1.00 66.94           O  
ATOM   3317  OD2 ASP C 121     -22.005  70.260  49.094  1.00 64.12           O1-
ATOM   3318  N   SER C 122     -23.603  69.344  47.046  1.00 61.53           N  
ATOM   3319  CA  SER C 122     -23.741  67.908  46.780  1.00 61.49           C  
ATOM   3320  C   SER C 122     -25.073  67.340  47.282  1.00 62.84           C  
ATOM   3321  O   SER C 122     -25.809  68.007  48.015  1.00 65.12           O  
ATOM   3322  CB  SER C 122     -22.584  67.141  47.423  1.00 60.17           C  
ATOM   3323  OG  SER C 122     -22.658  67.204  48.836  1.00 55.99           O  
ATOM   3324  N   VAL C 123     -25.359  66.104  46.876  1.00 63.01           N  
ATOM   3325  CA  VAL C 123     -26.582  65.400  47.282  1.00 63.36           C  
ATOM   3326  C   VAL C 123     -26.601  65.227  48.804  1.00 63.20           C  
ATOM   3327  O   VAL C 123     -27.637  65.404  49.441  1.00 63.99           O  
ATOM   3328  CB  VAL C 123     -26.714  64.024  46.581  1.00 63.92           C  
ATOM   3329  CG1 VAL C 123     -27.937  63.263  47.084  1.00 64.89           C  
ATOM   3330  CG2 VAL C 123     -26.811  64.193  45.066  1.00 64.18           C  
ATOM   3331  N   GLU C 124     -25.444  64.879  49.366  1.00 64.62           N  
ATOM   3332  CA  GLU C 124     -25.249  64.783  50.818  1.00 64.86           C  
ATOM   3333  C   GLU C 124     -25.596  66.093  51.537  1.00 63.32           C  
ATOM   3334  O   GLU C 124     -26.406  66.090  52.462  1.00 61.59           O  
ATOM   3335  CB  GLU C 124     -23.802  64.386  51.115  1.00 68.53           C  
ATOM   3336  CG  GLU C 124     -23.502  63.996  52.552  1.00 72.09           C  
ATOM   3337  CD  GLU C 124     -22.009  63.878  52.845  1.00 73.18           C  
ATOM   3338  OE1 GLU C 124     -21.363  63.057  52.170  1.00 76.36           O  
ATOM   3339  OE2 GLU C 124     -21.477  64.591  53.734  1.00 68.95           O1-
ATOM   3340  N   SER C 125     -24.983  67.198  51.106  1.00 63.94           N  
ATOM   3341  CA  SER C 125     -25.264  68.529  51.673  1.00 63.16           C  
ATOM   3342  C   SER C 125     -26.705  68.945  51.462  1.00 62.77           C  
ATOM   3343  O   SER C 125     -27.285  69.592  52.324  1.00 61.96           O  
ATOM   3344  CB  SER C 125     -24.370  69.606  51.059  1.00 63.03           C  
ATOM   3345  OG  SER C 125     -23.048  69.513  51.542  1.00 66.55           O  
ATOM   3346  N   ALA C 126     -27.265  68.587  50.307  1.00 62.55           N  
ATOM   3347  CA  ALA C 126     -28.645  68.930  49.970  1.00 63.18           C  
ATOM   3348  C   ALA C 126     -29.630  68.345  50.976  1.00 62.10           C  
ATOM   3349  O   ALA C 126     -30.453  69.075  51.528  1.00 61.17           O  
ATOM   3350  CB  ALA C 126     -28.986  68.467  48.559  1.00 63.13           C  
ATOM   3351  N   GLU C 127     -29.519  67.042  51.230  1.00 62.46           N  
ATOM   3352  CA  GLU C 127     -30.403  66.360  52.181  1.00 63.78           C  
ATOM   3353  C   GLU C 127     -30.241  66.863  53.618  1.00 63.01           C  
ATOM   3354  O   GLU C 127     -31.222  66.911  54.364  1.00 66.97           O  
ATOM   3355  CB  GLU C 127     -30.209  64.838  52.124  1.00 66.09           C  
ATOM   3356  CG  GLU C 127     -30.586  64.191  50.794  1.00 71.09           C  
ATOM   3357  CD  GLU C 127     -32.008  64.512  50.335  1.00 78.15           C  
ATOM   3358  OE1 GLU C 127     -32.936  64.504  51.176  1.00 79.23           O  
ATOM   3359  OE2 GLU C 127     -32.202  64.779  49.124  1.00 82.62           O1-
ATOM   3360  N   LYS C 128     -29.022  67.252  53.995  1.00 61.73           N  
ATOM   3361  CA  LYS C 128     -28.771  67.861  55.306  1.00 61.98           C  
ATOM   3362  C   LYS C 128     -29.419  69.245  55.409  1.00 59.67           C  
ATOM   3363  O   LYS C 128     -30.086  69.552  56.396  1.00 58.67           O  
ATOM   3364  CB  LYS C 128     -27.265  67.974  55.574  1.00 64.89           C  
ATOM   3365  CG  LYS C 128     -26.911  68.307  57.023  1.00 70.31           C  
ATOM   3366  CD  LYS C 128     -25.707  69.238  57.145  1.00 73.09           C  
ATOM   3367  CE  LYS C 128     -25.614  69.856  58.537  1.00 75.44           C  
ATOM   3368  NZ  LYS C 128     -24.579  70.927  58.603  1.00 75.85           N1+
ATOM   3369  N   GLU C 129     -29.200  70.072  54.390  1.00 60.16           N  
ATOM   3370  CA  GLU C 129     -29.730  71.442  54.342  1.00 58.99           C  
ATOM   3371  C   GLU C 129     -31.262  71.479  54.224  1.00 57.95           C  
ATOM   3372  O   GLU C 129     -31.911  72.309  54.866  1.00 55.64           O  
ATOM   3373  CB  GLU C 129     -29.067  72.230  53.200  1.00 59.94           C  
ATOM   3374  CG  GLU C 129     -27.575  72.485  53.420  1.00 61.28           C  
ATOM   3375  CD  GLU C 129     -26.819  72.939  52.177  1.00 61.22           C  
ATOM   3376  OE1 GLU C 129     -25.572  72.931  52.219  1.00 64.26           O  
ATOM   3377  OE2 GLU C 129     -27.446  73.312  51.163  1.00 60.65           O1-
ATOM   3378  N   ILE C 130     -31.839  70.580  53.420  1.00 59.10           N  
ATOM   3379  CA  ILE C 130     -33.311  70.459  53.307  1.00 59.00           C  
ATOM   3380  C   ILE C 130     -33.925  70.117  54.669  1.00 59.26           C  
ATOM   3381  O   ILE C 130     -34.828  70.809  55.132  1.00 55.40           O  
ATOM   3382  CB  ILE C 130     -33.744  69.414  52.245  1.00 57.29           C  
ATOM   3383  CG1 ILE C 130     -33.434  69.927  50.837  1.00 58.37           C  
ATOM   3384  CG2 ILE C 130     -35.239  69.114  52.334  1.00 55.78           C  
ATOM   3385  CD1 ILE C 130     -33.372  68.839  49.785  1.00 60.72           C  
ATOM   3386  N   GLY C 131     -33.410  69.060  55.301  1.00 62.35           N  
ATOM   3387  CA  GLY C 131     -33.823  68.664  56.655  1.00 63.13           C  
ATOM   3388  C   GLY C 131     -33.670  69.762  57.704  1.00 61.45           C  
ATOM   3389  O   GLY C 131     -34.492  69.883  58.611  1.00 60.99           O  
ATOM   3390  N   LEU C 132     -32.612  70.554  57.563  1.00 60.64           N  
ATOM   3391  CA  LEU C 132     -32.305  71.660  58.467  1.00 61.48           C  
ATOM   3392  C   LEU C 132     -33.274  72.843  58.340  1.00 59.37           C  
ATOM   3393  O   LEU C 132     -33.722  73.387  59.352  1.00 55.85           O  
ATOM   3394  CB  LEU C 132     -30.863  72.122  58.209  1.00 65.19           C  
ATOM   3395  CG  LEU C 132     -30.255  73.253  59.034  1.00 69.60           C  
ATOM   3396  CD1 LEU C 132     -30.372  72.985  60.531  1.00 70.54           C  
ATOM   3397  CD2 LEU C 132     -28.799  73.441  58.629  1.00 71.86           C  
ATOM   3398  N   TRP C 133     -33.585  73.232  57.101  1.00 58.72           N  
ATOM   3399  CA  TRP C 133     -34.404  74.433  56.814  1.00 56.46           C  
ATOM   3400  C   TRP C 133     -35.927  74.191  56.732  1.00 57.26           C  
ATOM   3401  O   TRP C 133     -36.699  75.138  56.883  1.00 60.29           O  
ATOM   3402  CB  TRP C 133     -33.935  75.105  55.508  1.00 52.95           C  
ATOM   3403  CG  TRP C 133     -32.646  75.865  55.620  1.00 51.01           C  
ATOM   3404  CD1 TRP C 133     -31.389  75.346  55.624  1.00 51.82           C  
ATOM   3405  CD2 TRP C 133     -32.491  77.285  55.730  1.00 50.19           C  
ATOM   3406  NE1 TRP C 133     -30.463  76.347  55.729  1.00 52.35           N  
ATOM   3407  CE2 TRP C 133     -31.108  77.549  55.800  1.00 50.37           C  
ATOM   3408  CE3 TRP C 133     -33.386  78.358  55.776  1.00 52.73           C  
ATOM   3409  CZ2 TRP C 133     -30.589  78.845  55.922  1.00 51.62           C  
ATOM   3410  CZ3 TRP C 133     -32.873  79.654  55.891  1.00 53.77           C  
ATOM   3411  CH2 TRP C 133     -31.480  79.882  55.963  1.00 53.44           C  
ATOM   3412  N   PHE C 134     -36.346  72.949  56.469  1.00 57.36           N  
ATOM   3413  CA  PHE C 134     -37.758  72.599  56.248  1.00 55.23           C  
ATOM   3414  C   PHE C 134     -38.187  71.437  57.133  1.00 56.69           C  
ATOM   3415  O   PHE C 134     -37.414  70.508  57.355  1.00 55.48           O  
ATOM   3416  CB  PHE C 134     -37.984  72.184  54.786  1.00 54.46           C  
ATOM   3417  CG  PHE C 134     -37.939  73.325  53.805  1.00 54.05           C  
ATOM   3418  CD1 PHE C 134     -39.115  73.913  53.350  1.00 55.37           C  
ATOM   3419  CD2 PHE C 134     -36.727  73.800  53.317  1.00 52.55           C  
ATOM   3420  CE1 PHE C 134     -39.082  74.959  52.440  1.00 56.23           C  
ATOM   3421  CE2 PHE C 134     -36.687  74.850  52.411  1.00 53.92           C  
ATOM   3422  CZ  PHE C 134     -37.866  75.430  51.970  1.00 55.77           C  
ATOM   3423  N   HIS C 135     -39.422  71.493  57.631  1.00 61.31           N  
ATOM   3424  CA  HIS C 135     -40.081  70.309  58.182  1.00 63.09           C  
ATOM   3425  C   HIS C 135     -40.552  69.503  56.967  1.00 63.27           C  
ATOM   3426  O   HIS C 135     -40.867  70.101  55.933  1.00 61.40           O  
ATOM   3427  CB  HIS C 135     -41.280  70.673  59.074  1.00 67.54           C  
ATOM   3428  CG  HIS C 135     -40.944  71.585  60.219  1.00 73.29           C  
ATOM   3429  ND1 HIS C 135     -41.543  72.816  60.391  1.00 77.02           N  
ATOM   3430  CD2 HIS C 135     -40.071  71.449  61.245  1.00 77.42           C  
ATOM   3431  CE1 HIS C 135     -41.053  73.399  61.470  1.00 75.20           C  
ATOM   3432  NE2 HIS C 135     -40.156  72.592  62.006  1.00 78.20           N  
ATOM   3433  N   PRO C 136     -40.616  68.157  57.072  1.00 64.11           N  
ATOM   3434  CA  PRO C 136     -41.055  67.337  55.917  1.00 65.21           C  
ATOM   3435  C   PRO C 136     -42.489  67.619  55.421  1.00 66.73           C  
ATOM   3436  O   PRO C 136     -42.798  67.384  54.249  1.00 64.93           O  
ATOM   3437  CB  PRO C 136     -40.946  65.891  56.441  1.00 64.57           C  
ATOM   3438  CG  PRO C 136     -40.109  65.966  57.670  1.00 64.23           C  
ATOM   3439  CD  PRO C 136     -40.365  67.318  58.259  1.00 64.90           C  
ATOM   3440  N   GLU C 137     -43.332  68.116  56.324  1.00 70.83           N  
ATOM   3441  CA  GLU C 137     -44.728  68.452  56.047  1.00 73.65           C  
ATOM   3442  C   GLU C 137     -44.806  69.662  55.067  1.00 70.41           C  
ATOM   3443  O   GLU C 137     -45.786  69.814  54.332  1.00 70.78           O  
ATOM   3444  CB  GLU C 137     -45.521  68.777  57.359  1.00 79.93           C  
ATOM   3445  CG  GLU C 137     -45.234  68.073  58.728  1.00 86.63           C  
ATOM   3446  CD  GLU C 137     -44.940  68.948  59.972  1.00 92.44           C  
ATOM   3447  OE1 GLU C 137     -45.496  70.062  60.249  1.00 96.97           O  
ATOM   3448  OE2 GLU C 137     -44.098  68.435  60.745  1.00 90.84           O1-
ATOM   3449  N   GLU C 138     -43.778  70.516  55.064  1.00 69.26           N  
ATOM   3450  CA  GLU C 138     -43.717  71.706  54.192  1.00 66.28           C  
ATOM   3451  C   GLU C 138     -43.281  71.435  52.749  1.00 66.41           C  
ATOM   3452  O   GLU C 138     -43.383  72.326  51.902  1.00 64.33           O  
ATOM   3453  CB  GLU C 138     -42.760  72.743  54.786  1.00 64.59           C  
ATOM   3454  CG  GLU C 138     -43.152  73.240  56.165  1.00 63.48           C  
ATOM   3455  CD  GLU C 138     -42.165  74.246  56.710  1.00 62.14           C  
ATOM   3456  OE1 GLU C 138     -40.970  73.911  56.812  1.00 59.80           O  
ATOM   3457  OE2 GLU C 138     -42.582  75.378  57.035  1.00 64.85           O1-
ATOM   3458  N   LEU C 139     -42.777  70.234  52.470  1.00 69.04           N  
ATOM   3459  CA  LEU C 139     -42.315  69.876  51.125  1.00 70.73           C  
ATOM   3460  C   LEU C 139     -43.444  69.202  50.349  1.00 68.55           C  
ATOM   3461  O   LEU C 139     -43.844  68.085  50.673  1.00 69.17           O  
ATOM   3462  CB  LEU C 139     -41.089  68.959  51.200  1.00 70.80           C  
ATOM   3463  CG  LEU C 139     -39.899  69.493  52.003  1.00 72.94           C  
ATOM   3464  CD1 LEU C 139     -38.811  68.435  52.072  1.00 75.68           C  
ATOM   3465  CD2 LEU C 139     -39.343  70.789  51.425  1.00 72.69           C  
ATOM   3466  N   VAL C 140     -43.934  69.887  49.317  1.00 66.44           N  
ATOM   3467  CA  VAL C 140     -45.124  69.460  48.589  1.00 65.45           C  
ATOM   3468  C   VAL C 140     -44.766  68.517  47.439  1.00 65.83           C  
ATOM   3469  O   VAL C 140     -43.822  68.756  46.686  1.00 64.70           O  
ATOM   3470  CB  VAL C 140     -45.933  70.659  48.034  1.00 66.14           C  
ATOM   3471  CG1 VAL C 140     -47.271  70.179  47.481  1.00 67.98           C  
ATOM   3472  CG2 VAL C 140     -46.175  71.714  49.112  1.00 65.08           C  
ATOM   3473  N   ASP C 141     -45.556  67.457  47.311  1.00 69.09           N  
ATOM   3474  CA  ASP C 141     -45.388  66.448  46.284  1.00 71.48           C  
ATOM   3475  C   ASP C 141     -46.475  66.616  45.224  1.00 68.62           C  
ATOM   3476  O   ASP C 141     -47.661  66.628  45.552  1.00 71.36           O  
ATOM   3477  CB  ASP C 141     -45.520  65.066  46.932  1.00 75.10           C  
ATOM   3478  CG  ASP C 141     -44.603  64.040  46.315  1.00 81.64           C  
ATOM   3479  OD1 ASP C 141     -44.599  63.926  45.069  1.00 82.83           O  
ATOM   3480  OD2 ASP C 141     -43.897  63.337  47.079  1.00 86.85           O1-
ATOM   3481  N   TYR C 142     -46.073  66.758  43.964  1.00 66.76           N  
ATOM   3482  CA  TYR C 142     -47.013  66.788  42.830  1.00 63.15           C  
ATOM   3483  C   TYR C 142     -46.294  66.507  41.514  1.00 64.38           C  
ATOM   3484  O   TYR C 142     -45.067  66.550  41.444  1.00 62.42           O  
ATOM   3485  CB  TYR C 142     -47.748  68.131  42.744  1.00 59.98           C  
ATOM   3486  CG  TYR C 142     -46.850  69.325  42.509  1.00 57.65           C  
ATOM   3487  CD1 TYR C 142     -46.175  69.933  43.568  1.00 57.90           C  
ATOM   3488  CD2 TYR C 142     -46.673  69.853  41.228  1.00 57.49           C  
ATOM   3489  CE1 TYR C 142     -45.352  71.037  43.362  1.00 56.69           C  
ATOM   3490  CE2 TYR C 142     -45.847  70.953  41.011  1.00 56.38           C  
ATOM   3491  CZ  TYR C 142     -45.188  71.541  42.083  1.00 55.67           C  
ATOM   3492  OH  TYR C 142     -44.375  72.628  41.888  1.00 51.98           O  
ATOM   3493  N   THR C 143     -47.077  66.230  40.479  1.00 66.79           N  
ATOM   3494  CA  THR C 143     -46.560  65.915  39.147  1.00 69.27           C  
ATOM   3495  C   THR C 143     -46.692  67.143  38.256  1.00 68.89           C  
ATOM   3496  O   THR C 143     -47.782  67.702  38.131  1.00 67.20           O  
ATOM   3497  CB  THR C 143     -47.362  64.749  38.524  1.00 71.53           C  
ATOM   3498  OG1 THR C 143     -47.413  63.648  39.442  1.00 73.40           O  
ATOM   3499  CG2 THR C 143     -46.742  64.274  37.224  1.00 72.32           C  
ATOM   3500  N   SER C 144     -45.586  67.554  37.638  1.00 71.31           N  
ATOM   3501  CA  SER C 144     -45.610  68.618  36.633  1.00 71.64           C  
ATOM   3502  C   SER C 144     -46.363  68.131  35.393  1.00 72.32           C  
ATOM   3503  O   SER C 144     -46.136  67.010  34.920  1.00 75.34           O  
ATOM   3504  CB  SER C 144     -44.183  69.034  36.253  1.00 72.55           C  
ATOM   3505  OG  SER C 144     -44.181  69.985  35.198  1.00 74.12           O  
ATOM   3506  N   CYS C 145     -47.257  68.970  34.875  1.00 70.90           N  
ATOM   3507  CA  CYS C 145     -48.003  68.649  33.656  1.00 72.40           C  
ATOM   3508  C   CYS C 145     -47.097  68.549  32.420  1.00 73.56           C  
ATOM   3509  O   CYS C 145     -47.467  67.916  31.429  1.00 72.87           O  
ATOM   3510  CB  CYS C 145     -49.113  69.678  33.410  1.00 73.86           C  
ATOM   3511  SG  CYS C 145     -48.545  71.319  32.895  1.00 73.37           S  
ATOM   3512  N   ALA C 146     -45.927  69.187  32.483  1.00 76.38           N  
ATOM   3513  CA  ALA C 146     -44.917  69.109  31.426  1.00 78.27           C  
ATOM   3514  C   ALA C 146     -43.862  68.010  31.654  1.00 79.82           C  
ATOM   3515  O   ALA C 146     -42.856  67.992  30.944  1.00 82.52           O  
ATOM   3516  CB  ALA C 146     -44.238  70.471  31.272  1.00 75.85           C  
ATOM   3517  N   GLN C 147     -44.087  67.092  32.603  1.00 79.69           N  
ATOM   3518  CA  GLN C 147     -43.080  66.073  32.956  1.00 79.45           C  
ATOM   3519  C   GLN C 147     -42.678  65.171  31.783  1.00 77.74           C  
ATOM   3520  O   GLN C 147     -41.497  64.872  31.614  1.00 71.35           O  
ATOM   3521  CB  GLN C 147     -43.544  65.198  34.135  1.00 81.30           C  
ATOM   3522  CG  GLN C 147     -42.587  64.044  34.446  1.00 81.07           C  
ATOM   3523  CD  GLN C 147     -42.733  63.484  35.845  1.00 82.24           C  
ATOM   3524  OE1 GLN C 147     -43.835  63.413  36.381  1.00 85.13           O  
ATOM   3525  NE2 GLN C 147     -41.619  63.063  36.439  1.00 81.69           N  
ATOM   3526  N   ASN C 148     -43.654  64.739  30.987  1.00 80.02           N  
ATOM   3527  CA  ASN C 148     -43.383  63.877  29.822  1.00 80.37           C  
ATOM   3528  C   ASN C 148     -42.632  64.587  28.688  1.00 78.47           C  
ATOM   3529  O   ASN C 148     -42.065  63.921  27.822  1.00 76.24           O  
ATOM   3530  CB  ASN C 148     -44.682  63.269  29.280  1.00 80.89           C  
ATOM   3531  CG  ASN C 148     -45.329  62.295  30.253  1.00 81.99           C  
ATOM   3532  OD1 ASN C 148     -44.686  61.778  31.172  1.00 81.82           O  
ATOM   3533  ND2 ASN C 148     -46.618  62.044  30.056  1.00 85.61           N  
ATOM   3534  N   TRP C 149     -42.646  65.921  28.693  1.00 77.18           N  
ATOM   3535  CA  TRP C 149     -41.853  66.732  27.760  1.00 76.44           C  
ATOM   3536  C   TRP C 149     -40.518  67.238  28.334  1.00 74.87           C  
ATOM   3537  O   TRP C 149     -39.712  67.790  27.597  1.00 72.79           O  
ATOM   3538  CB  TRP C 149     -42.701  67.898  27.259  1.00 75.35           C  
ATOM   3539  CG  TRP C 149     -43.941  67.415  26.604  1.00 74.75           C  
ATOM   3540  CD1 TRP C 149     -45.209  67.453  27.117  1.00 75.98           C  
ATOM   3541  CD2 TRP C 149     -44.039  66.768  25.329  1.00 72.96           C  
ATOM   3542  NE1 TRP C 149     -46.093  66.895  26.224  1.00 75.89           N  
ATOM   3543  CE2 TRP C 149     -45.402  66.461  25.122  1.00 74.39           C  
ATOM   3544  CE3 TRP C 149     -43.109  66.424  24.337  1.00 69.79           C  
ATOM   3545  CZ2 TRP C 149     -45.862  65.834  23.955  1.00 73.59           C  
ATOM   3546  CZ3 TRP C 149     -43.566  65.796  23.179  1.00 70.46           C  
ATOM   3547  CH2 TRP C 149     -44.931  65.507  22.999  1.00 71.34           C  
ATOM   3548  N   ILE C 150     -40.301  67.063  29.639  1.00 73.67           N  
ATOM   3549  CA  ILE C 150     -39.006  67.324  30.280  1.00 72.56           C  
ATOM   3550  C   ILE C 150     -38.167  66.030  30.378  1.00 70.10           C  
ATOM   3551  O   ILE C 150     -36.941  66.100  30.275  1.00 67.75           O  
ATOM   3552  CB  ILE C 150     -39.194  67.988  31.673  1.00 73.76           C  
ATOM   3553  CG1 ILE C 150     -39.955  69.322  31.544  1.00 73.60           C  
ATOM   3554  CG2 ILE C 150     -37.851  68.253  32.356  1.00 73.18           C  
ATOM   3555  CD1 ILE C 150     -40.686  69.744  32.805  1.00 73.79           C  
ATOM   3556  N   TYR C 151     -38.821  64.873  30.577  1.00 69.14           N  
ATOM   3557  CA  TYR C 151     -38.153  63.555  30.670  1.00 66.74           C  
ATOM   3558  C   TYR C 151     -38.830  62.510  29.775  1.00 62.18           C  
ATOM   3559  O   TYR C 151     -38.309  61.403  29.589  1.00 60.00           O  
ATOM   3560  CB  TYR C 151     -38.135  63.050  32.126  1.00 68.55           C  
ATOM   3561  CG  TYR C 151     -37.627  64.057  33.151  1.00 68.97           C  
ATOM   3562  CD1 TYR C 151     -36.265  64.339  33.275  1.00 70.09           C  
ATOM   3563  CD2 TYR C 151     -38.515  64.729  34.001  1.00 69.44           C  
ATOM   3564  CE1 TYR C 151     -35.808  65.263  34.213  1.00 72.24           C  
ATOM   3565  CE2 TYR C 151     -38.069  65.653  34.941  1.00 70.27           C  
ATOM   3566  CZ  TYR C 151     -36.717  65.917  35.046  1.00 72.47           C  
ATOM   3567  OH  TYR C 151     -36.282  66.833  35.981  1.00 73.28           O  
TER    3568      TYR C 151                                                      
ATOM   3569  N   ASN D   3     -44.216 114.537  12.483  1.00 63.08           N  
ATOM   3570  CA  ASN D   3     -43.527 113.249  12.133  1.00 65.96           C  
ATOM   3571  C   ASN D   3     -42.075 113.188  12.638  1.00 67.15           C  
ATOM   3572  O   ASN D   3     -41.563 112.100  12.945  1.00 64.71           O  
ATOM   3573  CB  ASN D   3     -43.573 112.998  10.619  1.00 66.10           C  
ATOM   3574  CG  ASN D   3     -43.415 111.527  10.271  1.00 64.32           C  
ATOM   3575  OD1 ASN D   3     -42.328 110.968  10.365  1.00 61.31           O  
ATOM   3576  ND2 ASN D   3     -44.507 110.894   9.876  1.00 65.84           N  
ATOM   3577  N   CYS D   4     -41.410 114.346  12.677  1.00 67.03           N  
ATOM   3578  CA  CYS D   4     -40.209 114.536  13.496  1.00 65.16           C  
ATOM   3579  C   CYS D   4     -40.488 115.598  14.582  1.00 60.56           C  
ATOM   3580  O   CYS D   4     -39.733 116.560  14.762  1.00 57.34           O  
ATOM   3581  CB  CYS D   4     -38.977 114.850  12.628  1.00 66.36           C  
ATOM   3582  SG  CYS D   4     -39.231 116.061  11.321  1.00 70.31           S  
ATOM   3583  N   GLU D   5     -41.602 115.384  15.289  1.00 57.85           N  
ATOM   3584  CA  GLU D   5     -41.960 116.085  16.524  1.00 56.54           C  
ATOM   3585  C   GLU D   5     -41.085 115.516  17.627  1.00 58.84           C  
ATOM   3586  O   GLU D   5     -40.624 114.381  17.523  1.00 62.33           O  
ATOM   3587  CB  GLU D   5     -43.437 115.825  16.835  1.00 57.01           C  
ATOM   3588  CG  GLU D   5     -44.016 116.417  18.120  1.00 57.33           C  
ATOM   3589  CD  GLU D   5     -45.461 115.969  18.353  1.00 57.04           C  
ATOM   3590  OE1 GLU D   5     -45.803 115.595  19.500  1.00 54.11           O  
ATOM   3591  OE2 GLU D   5     -46.255 115.965  17.381  1.00 54.38           O1-
ATOM   3592  N   ARG D   6     -40.857 116.300  18.677  1.00 59.58           N  
ATOM   3593  CA  ARG D   6     -39.899 115.949  19.726  1.00 59.93           C  
ATOM   3594  C   ARG D   6     -40.485 116.195  21.111  1.00 59.01           C  
ATOM   3595  O   ARG D   6     -41.132 117.216  21.324  1.00 66.49           O  
ATOM   3596  CB  ARG D   6     -38.639 116.790  19.567  1.00 61.48           C  
ATOM   3597  CG  ARG D   6     -37.981 116.673  18.207  1.00 65.35           C  
ATOM   3598  CD  ARG D   6     -36.801 117.618  18.093  1.00 69.57           C  
ATOM   3599  NE  ARG D   6     -35.774 117.093  17.195  1.00 73.32           N  
ATOM   3600  CZ  ARG D   6     -34.524 117.550  17.115  1.00 78.67           C  
ATOM   3601  NH1 ARG D   6     -34.107 118.563  17.878  1.00 81.69           N1+
ATOM   3602  NH2 ARG D   6     -33.670 116.984  16.262  1.00 82.55           N  
ATOM   3603  N   THR D   7     -40.253 115.271  22.045  1.00 55.07           N  
ATOM   3604  CA  THR D   7     -40.692 115.427  23.440  1.00 52.82           C  
ATOM   3605  C   THR D   7     -39.513 115.289  24.389  1.00 52.18           C  
ATOM   3606  O   THR D   7     -38.481 114.717  24.032  1.00 54.51           O  
ATOM   3607  CB  THR D   7     -41.798 114.421  23.838  1.00 52.38           C  
ATOM   3608  OG1 THR D   7     -42.405 114.845  25.059  1.00 52.58           O  
ATOM   3609  CG2 THR D   7     -41.261 113.005  24.026  1.00 53.53           C  
ATOM   3610  N   PHE D   8     -39.683 115.814  25.598  1.00 50.80           N  
ATOM   3611  CA  PHE D   8     -38.653 115.759  26.631  1.00 49.13           C  
ATOM   3612  C   PHE D   8     -39.067 114.750  27.704  1.00 50.50           C  
ATOM   3613  O   PHE D   8     -40.161 114.846  28.274  1.00 50.79           O  
ATOM   3614  CB  PHE D   8     -38.420 117.152  27.232  1.00 47.12           C  
ATOM   3615  CG  PHE D   8     -37.530 117.151  28.434  1.00 44.47           C  
ATOM   3616  CD1 PHE D   8     -36.151 117.160  28.291  1.00 43.62           C  
ATOM   3617  CD2 PHE D   8     -38.074 117.127  29.710  1.00 43.84           C  
ATOM   3618  CE1 PHE D   8     -35.326 117.148  29.403  1.00 43.72           C  
ATOM   3619  CE2 PHE D   8     -37.256 117.119  30.825  1.00 44.61           C  
ATOM   3620  CZ  PHE D   8     -35.877 117.128  30.671  1.00 44.24           C  
ATOM   3621  N   ILE D   9     -38.182 113.788  27.963  1.00 50.89           N  
ATOM   3622  CA  ILE D   9     -38.390 112.769  28.985  1.00 50.77           C  
ATOM   3623  C   ILE D   9     -37.234 112.862  29.986  1.00 50.76           C  
ATOM   3624  O   ILE D   9     -36.073 112.951  29.577  1.00 50.19           O  
ATOM   3625  CB  ILE D   9     -38.428 111.344  28.378  1.00 50.22           C  
ATOM   3626  CG1 ILE D   9     -39.438 111.237  27.215  1.00 49.91           C  
ATOM   3627  CG2 ILE D   9     -38.736 110.313  29.458  1.00 49.42           C  
ATOM   3628  CD1 ILE D   9     -40.901 111.327  27.609  1.00 49.95           C  
ATOM   3629  N   ALA D  10     -37.556 112.831  31.283  1.00 50.47           N  
ATOM   3630  CA  ALA D  10     -36.552 112.865  32.360  1.00 50.30           C  
ATOM   3631  C   ALA D  10     -36.813 111.775  33.393  1.00 52.25           C  
ATOM   3632  O   ALA D  10     -37.851 111.798  34.067  1.00 52.70           O  
ATOM   3633  CB  ALA D  10     -36.549 114.219  33.044  1.00 50.20           C  
ATOM   3634  N   ILE D  11     -35.871 110.836  33.524  1.00 52.20           N  
ATOM   3635  CA  ILE D  11     -35.952 109.797  34.551  1.00 51.11           C  
ATOM   3636  C   ILE D  11     -35.490 110.485  35.822  1.00 50.97           C  
ATOM   3637  O   ILE D  11     -34.333 110.862  35.942  1.00 54.56           O  
ATOM   3638  CB  ILE D  11     -35.080 108.570  34.220  1.00 51.39           C  
ATOM   3639  CG1 ILE D  11     -35.481 107.974  32.862  1.00 51.93           C  
ATOM   3640  CG2 ILE D  11     -35.199 107.510  35.315  1.00 50.06           C  
ATOM   3641  CD1 ILE D  11     -34.386 107.160  32.210  1.00 53.44           C  
ATOM   3642  N   LYS D  12     -36.414 110.635  36.755  1.00 50.36           N  
ATOM   3643  CA  LYS D  12     -36.205 111.265  38.054  1.00 52.12           C  
ATOM   3644  C   LYS D  12     -35.162 110.518  38.888  1.00 52.99           C  
ATOM   3645  O   LYS D  12     -34.795 109.394  38.547  1.00 52.63           O  
ATOM   3646  CB  LYS D  12     -37.569 111.383  38.740  1.00 53.85           C  
ATOM   3647  CG  LYS D  12     -38.562 112.138  37.865  1.00 55.74           C  
ATOM   3648  CD  LYS D  12     -39.821 112.541  38.611  1.00 56.21           C  
ATOM   3649  CE  LYS D  12     -40.519 113.678  37.886  1.00 57.41           C  
ATOM   3650  NZ  LYS D  12     -41.993 113.498  37.816  1.00 60.17           N  
ATOM   3651  N   PRO D  13     -34.669 111.132  39.992  1.00 55.13           N  
ATOM   3652  CA  PRO D  13     -33.636 110.451  40.860  1.00 55.68           C  
ATOM   3653  C   PRO D  13     -33.977 109.053  41.430  1.00 53.57           C  
ATOM   3654  O   PRO D  13     -33.107 108.181  41.460  1.00 51.21           O  
ATOM   3655  CB  PRO D  13     -33.432 111.458  42.017  1.00 55.68           C  
ATOM   3656  CG  PRO D  13     -33.739 112.776  41.395  1.00 55.87           C  
ATOM   3657  CD  PRO D  13     -34.920 112.505  40.500  1.00 55.99           C  
ATOM   3658  N   ASP D  14     -35.205 108.875  41.906  1.00 54.31           N  
ATOM   3659  CA  ASP D  14     -35.698 107.559  42.336  1.00 55.36           C  
ATOM   3660  C   ASP D  14     -35.642 106.513  41.219  1.00 54.53           C  
ATOM   3661  O   ASP D  14     -35.326 105.350  41.476  1.00 54.10           O  
ATOM   3662  CB  ASP D  14     -37.128 107.646  42.898  1.00 57.98           C  
ATOM   3663  CG  ASP D  14     -38.096 108.351  41.962  1.00 61.16           C  
ATOM   3664  OD1 ASP D  14     -37.675 109.311  41.277  1.00 65.99           O  
ATOM   3665  OD2 ASP D  14     -39.279 107.955  41.911  1.00 61.96           O1-
ATOM   3666  N   GLY D  15     -35.941 106.929  39.987  1.00 53.31           N  
ATOM   3667  CA  GLY D  15     -35.836 106.054  38.811  1.00 50.26           C  
ATOM   3668  C   GLY D  15     -34.417 105.579  38.552  1.00 47.74           C  
ATOM   3669  O   GLY D  15     -34.200 104.411  38.244  1.00 47.98           O  
ATOM   3670  N   VAL D  16     -33.455 106.488  38.700  1.00 47.14           N  
ATOM   3671  CA  VAL D  16     -32.034 106.165  38.552  1.00 48.66           C  
ATOM   3672  C   VAL D  16     -31.569 105.263  39.701  1.00 51.45           C  
ATOM   3673  O   VAL D  16     -30.933 104.237  39.468  1.00 51.01           O  
ATOM   3674  CB  VAL D  16     -31.158 107.439  38.495  1.00 48.10           C  
ATOM   3675  CG1 VAL D  16     -29.670 107.098  38.465  1.00 49.19           C  
ATOM   3676  CG2 VAL D  16     -31.511 108.271  37.275  1.00 47.82           C  
ATOM   3677  N   GLN D  17     -31.888 105.669  40.929  1.00 54.44           N  
ATOM   3678  CA  GLN D  17     -31.546 104.911  42.146  1.00 56.27           C  
ATOM   3679  C   GLN D  17     -32.083 103.478  42.172  1.00 56.00           C  
ATOM   3680  O   GLN D  17     -31.416 102.582  42.688  1.00 53.93           O  
ATOM   3681  CB  GLN D  17     -32.036 105.660  43.394  1.00 56.13           C  
ATOM   3682  CG  GLN D  17     -31.156 106.842  43.765  1.00 57.14           C  
ATOM   3683  CD  GLN D  17     -29.881 106.446  44.495  1.00 57.66           C  
ATOM   3684  OE1 GLN D  17     -29.734 105.317  44.968  1.00 56.75           O  
ATOM   3685  NE2 GLN D  17     -28.951 107.387  44.600  1.00 59.72           N  
ATOM   3686  N   ARG D  18     -33.279 103.273  41.620  1.00 56.70           N  
ATOM   3687  CA  ARG D  18     -33.933 101.958  41.633  1.00 57.39           C  
ATOM   3688  C   ARG D  18     -33.596 101.073  40.420  1.00 57.86           C  
ATOM   3689  O   ARG D  18     -33.999  99.901  40.370  1.00 60.83           O  
ATOM   3690  CB  ARG D  18     -35.444 102.133  41.800  1.00 56.65           C  
ATOM   3691  CG  ARG D  18     -35.828 102.663  43.180  1.00 57.05           C  
ATOM   3692  CD  ARG D  18     -37.313 102.930  43.274  1.00 59.56           C  
ATOM   3693  NE  ARG D  18     -38.077 101.720  42.964  1.00 61.55           N  
ATOM   3694  CZ  ARG D  18     -39.280 101.681  42.387  1.00 62.76           C  
ATOM   3695  NH1 ARG D  18     -39.924 102.792  42.028  1.00 64.41           N1+
ATOM   3696  NH2 ARG D  18     -39.854 100.504  42.158  1.00 62.43           N  
ATOM   3697  N   GLY D  19     -32.855 101.627  39.460  1.00 56.19           N  
ATOM   3698  CA  GLY D  19     -32.267 100.851  38.367  1.00 54.29           C  
ATOM   3699  C   GLY D  19     -33.185 100.648  37.179  1.00 50.92           C  
ATOM   3700  O   GLY D  19     -33.236  99.562  36.617  1.00 51.62           O  
ATOM   3701  N   LEU D  20     -33.882 101.703  36.780  1.00 48.12           N  
ATOM   3702  CA  LEU D  20     -34.892 101.619  35.730  1.00 47.54           C  
ATOM   3703  C   LEU D  20     -34.503 102.364  34.448  1.00 47.58           C  
ATOM   3704  O   LEU D  20     -35.329 102.504  33.545  1.00 46.15           O  
ATOM   3705  CB  LEU D  20     -36.213 102.168  36.268  1.00 48.10           C  
ATOM   3706  CG  LEU D  20     -36.750 101.499  37.537  1.00 49.43           C  
ATOM   3707  CD1 LEU D  20     -37.850 102.352  38.156  1.00 50.03           C  
ATOM   3708  CD2 LEU D  20     -37.252 100.093  37.237  1.00 49.23           C  
ATOM   3709  N   VAL D  21     -33.253 102.820  34.355  1.00 47.75           N  
ATOM   3710  CA  VAL D  21     -32.817 103.668  33.237  1.00 48.40           C  
ATOM   3711  C   VAL D  21     -32.897 102.892  31.935  1.00 47.47           C  
ATOM   3712  O   VAL D  21     -33.508 103.347  30.966  1.00 46.69           O  
ATOM   3713  CB  VAL D  21     -31.380 104.218  33.445  1.00 49.57           C  
ATOM   3714  CG1 VAL D  21     -30.894 104.999  32.224  1.00 49.00           C  
ATOM   3715  CG2 VAL D  21     -31.325 105.113  34.682  1.00 49.53           C  
ATOM   3716  N   GLY D  22     -32.272 101.718  31.932  1.00 49.67           N  
ATOM   3717  CA  GLY D  22     -32.290 100.818  30.780  1.00 49.19           C  
ATOM   3718  C   GLY D  22     -33.687 100.338  30.442  1.00 48.15           C  
ATOM   3719  O   GLY D  22     -34.093 100.351  29.284  1.00 46.21           O  
ATOM   3720  N   GLU D  23     -34.430  99.950  31.471  1.00 49.24           N  
ATOM   3721  CA  GLU D  23     -35.803  99.492  31.310  1.00 51.25           C  
ATOM   3722  C   GLU D  23     -36.696 100.548  30.651  1.00 49.27           C  
ATOM   3723  O   GLU D  23     -37.465 100.226  29.747  1.00 49.84           O  
ATOM   3724  CB  GLU D  23     -36.388  99.093  32.666  1.00 55.62           C  
ATOM   3725  CG  GLU D  23     -37.615  98.205  32.573  1.00 60.51           C  
ATOM   3726  CD  GLU D  23     -37.282  96.772  32.188  1.00 63.20           C  
ATOM   3727  OE1 GLU D  23     -37.517  96.409  31.014  1.00 63.08           O  
ATOM   3728  OE2 GLU D  23     -36.780  96.021  33.060  1.00 64.80           O1-
ATOM   3729  N   ILE D  24     -36.571 101.797  31.094  1.00 46.55           N  
ATOM   3730  CA  ILE D  24     -37.345 102.911  30.539  1.00 45.57           C  
ATOM   3731  C   ILE D  24     -36.934 103.221  29.100  1.00 45.58           C  
ATOM   3732  O   ILE D  24     -37.793 103.346  28.226  1.00 43.94           O  
ATOM   3733  CB  ILE D  24     -37.239 104.170  31.438  1.00 44.88           C  
ATOM   3734  CG1 ILE D  24     -38.089 103.965  32.701  1.00 43.13           C  
ATOM   3735  CG2 ILE D  24     -37.688 105.440  30.709  1.00 44.75           C  
ATOM   3736  CD1 ILE D  24     -37.721 104.862  33.864  1.00 42.81           C  
ATOM   3737  N   ILE D  25     -35.631 103.367  28.870  1.00 46.15           N  
ATOM   3738  CA  ILE D  25     -35.097 103.641  27.527  1.00 47.58           C  
ATOM   3739  C   ILE D  25     -35.516 102.560  26.527  1.00 48.99           C  
ATOM   3740  O   ILE D  25     -35.866 102.869  25.381  1.00 50.72           O  
ATOM   3741  CB  ILE D  25     -33.552 103.795  27.547  1.00 46.63           C  
ATOM   3742  CG1 ILE D  25     -33.177 105.133  28.188  1.00 45.18           C  
ATOM   3743  CG2 ILE D  25     -32.961 103.733  26.134  1.00 46.79           C  
ATOM   3744  CD1 ILE D  25     -31.735 105.239  28.622  1.00 45.64           C  
ATOM   3745  N   LYS D  26     -35.469 101.306  26.972  1.00 49.74           N  
ATOM   3746  CA  LYS D  26     -35.863 100.150  26.163  1.00 49.99           C  
ATOM   3747  C   LYS D  26     -37.274 100.295  25.596  1.00 49.68           C  
ATOM   3748  O   LYS D  26     -37.507  99.956  24.438  1.00 50.71           O  
ATOM   3749  CB  LYS D  26     -35.752  98.876  27.007  1.00 51.13           C  
ATOM   3750  CG  LYS D  26     -36.139  97.570  26.329  1.00 51.65           C  
ATOM   3751  CD  LYS D  26     -35.489  96.404  27.063  1.00 52.74           C  
ATOM   3752  CE  LYS D  26     -35.994  95.052  26.596  1.00 53.31           C  
ATOM   3753  NZ  LYS D  26     -37.279  94.693  27.247  1.00 54.32           N1+
ATOM   3754  N   ARG D  27     -38.194 100.823  26.402  1.00 48.61           N  
ATOM   3755  CA  ARG D  27     -39.592 100.987  25.985  1.00 47.98           C  
ATOM   3756  C   ARG D  27     -39.772 101.980  24.853  1.00 47.60           C  
ATOM   3757  O   ARG D  27     -40.575 101.743  23.953  1.00 49.08           O  
ATOM   3758  CB  ARG D  27     -40.473 101.390  27.168  1.00 48.12           C  
ATOM   3759  CG  ARG D  27     -40.502 100.332  28.255  1.00 48.49           C  
ATOM   3760  CD  ARG D  27     -41.748 100.396  29.104  1.00 48.78           C  
ATOM   3761  NE  ARG D  27     -41.773  99.297  30.061  1.00 48.24           N  
ATOM   3762  CZ  ARG D  27     -42.761  99.062  30.921  1.00 47.47           C  
ATOM   3763  NH1 ARG D  27     -43.831  99.850  30.968  1.00 47.58           N1+
ATOM   3764  NH2 ARG D  27     -42.672  98.021  31.744  1.00 48.20           N  
ATOM   3765  N   PHE D  28     -39.044 103.091  24.910  1.00 48.15           N  
ATOM   3766  CA  PHE D  28     -39.037 104.074  23.818  1.00 48.78           C  
ATOM   3767  C   PHE D  28     -38.370 103.535  22.553  1.00 46.99           C  
ATOM   3768  O   PHE D  28     -38.837 103.808  21.446  1.00 48.85           O  
ATOM   3769  CB  PHE D  28     -38.375 105.383  24.260  1.00 50.36           C  
ATOM   3770  CG  PHE D  28     -39.232 106.210  25.181  1.00 53.54           C  
ATOM   3771  CD1 PHE D  28     -39.156 106.047  26.562  1.00 55.19           C  
ATOM   3772  CD2 PHE D  28     -40.131 107.146  24.665  1.00 53.79           C  
ATOM   3773  CE1 PHE D  28     -39.952 106.802  27.412  1.00 55.26           C  
ATOM   3774  CE2 PHE D  28     -40.924 107.907  25.508  1.00 52.87           C  
ATOM   3775  CZ  PHE D  28     -40.834 107.736  26.881  1.00 55.53           C  
ATOM   3776  N   GLU D  29     -37.298 102.765  22.718  1.00 46.05           N  
ATOM   3777  CA  GLU D  29     -36.608 102.150  21.580  1.00 46.36           C  
ATOM   3778  C   GLU D  29     -37.489 101.138  20.862  1.00 46.26           C  
ATOM   3779  O   GLU D  29     -37.709 101.260  19.659  1.00 44.78           O  
ATOM   3780  CB  GLU D  29     -35.300 101.481  22.015  1.00 47.90           C  
ATOM   3781  CG  GLU D  29     -34.179 102.468  22.306  1.00 49.02           C  
ATOM   3782  CD  GLU D  29     -32.872 101.786  22.658  1.00 49.67           C  
ATOM   3783  OE1 GLU D  29     -32.843 101.062  23.679  1.00 51.68           O  
ATOM   3784  OE2 GLU D  29     -31.878 101.976  21.918  1.00 49.74           O1-
ATOM   3785  N   GLN D  30     -38.006 100.160  21.604  1.00 46.70           N  
ATOM   3786  CA  GLN D  30     -38.834  99.107  21.010  1.00 48.05           C  
ATOM   3787  C   GLN D  30     -40.158  99.623  20.447  1.00 48.26           C  
ATOM   3788  O   GLN D  30     -40.730  99.003  19.552  1.00 49.89           O  
ATOM   3789  CB  GLN D  30     -39.078  97.962  21.997  1.00 50.82           C  
ATOM   3790  CG  GLN D  30     -40.035  98.275  23.144  1.00 53.09           C  
ATOM   3791  CD  GLN D  30     -40.057  97.203  24.217  1.00 54.49           C  
ATOM   3792  OE1 GLN D  30     -39.178  96.356  24.267  1.00 54.60           O  
ATOM   3793  NE2 GLN D  30     -41.080  97.224  25.066  1.00 55.69           N  
ATOM   3794  N   LYS D  31     -40.649 100.739  20.980  1.00 48.49           N  
ATOM   3795  CA  LYS D  31     -41.838 101.415  20.439  1.00 48.12           C  
ATOM   3796  C   LYS D  31     -41.627 101.921  19.011  1.00 47.66           C  
ATOM   3797  O   LYS D  31     -42.555 101.879  18.203  1.00 48.34           O  
ATOM   3798  CB  LYS D  31     -42.240 102.567  21.369  1.00 47.97           C  
ATOM   3799  CG  LYS D  31     -43.398 103.432  20.903  1.00 48.98           C  
ATOM   3800  CD  LYS D  31     -44.686 102.648  20.790  1.00 48.67           C  
ATOM   3801  CE  LYS D  31     -45.850 103.592  20.579  1.00 48.06           C  
ATOM   3802  NZ  LYS D  31     -47.140 102.862  20.615  1.00 47.98           N1+
ATOM   3803  N   GLY D  32     -40.416 102.396  18.721  1.00 47.62           N  
ATOM   3804  CA  GLY D  32     -40.055 102.921  17.400  1.00 48.39           C  
ATOM   3805  C   GLY D  32     -39.503 104.344  17.388  1.00 50.26           C  
ATOM   3806  O   GLY D  32     -39.012 104.797  16.353  1.00 52.47           O  
ATOM   3807  N   PHE D  33     -39.582 105.051  18.517  1.00 48.20           N  
ATOM   3808  CA  PHE D  33     -39.110 106.434  18.601  1.00 46.86           C  
ATOM   3809  C   PHE D  33     -37.589 106.504  18.543  1.00 48.05           C  
ATOM   3810  O   PHE D  33     -36.904 105.563  18.932  1.00 48.95           O  
ATOM   3811  CB  PHE D  33     -39.612 107.112  19.882  1.00 46.65           C  
ATOM   3812  CG  PHE D  33     -41.109 107.268  19.940  1.00 46.94           C  
ATOM   3813  CD1 PHE D  33     -41.788 107.961  18.939  1.00 45.72           C  
ATOM   3814  CD2 PHE D  33     -41.845 106.733  20.997  1.00 47.26           C  
ATOM   3815  CE1 PHE D  33     -43.165 108.111  18.982  1.00 45.29           C  
ATOM   3816  CE2 PHE D  33     -43.225 106.881  21.045  1.00 46.71           C  
ATOM   3817  CZ  PHE D  33     -43.885 107.568  20.035  1.00 46.69           C  
ATOM   3818  N   ARG D  34     -37.082 107.635  18.059  1.00 49.21           N  
ATOM   3819  CA  ARG D  34     -35.660 107.841  17.821  1.00 49.51           C  
ATOM   3820  C   ARG D  34     -35.056 108.641  18.968  1.00 49.23           C  
ATOM   3821  O   ARG D  34     -35.556 109.711  19.300  1.00 48.08           O  
ATOM   3822  CB  ARG D  34     -35.467 108.592  16.501  1.00 51.42           C  
ATOM   3823  CG  ARG D  34     -34.016 108.775  16.088  1.00 54.41           C  
ATOM   3824  CD  ARG D  34     -33.880 109.402  14.705  1.00 58.33           C  
ATOM   3825  NE  ARG D  34     -34.122 110.856  14.673  1.00 62.23           N  
ATOM   3826  CZ  ARG D  34     -33.296 111.805  15.146  1.00 62.97           C  
ATOM   3827  NH1 ARG D  34     -33.633 113.085  15.040  1.00 60.01           N1+
ATOM   3828  NH2 ARG D  34     -32.136 111.499  15.730  1.00 64.64           N  
ATOM   3829  N   LEU D  35     -33.970 108.137  19.556  1.00 50.12           N  
ATOM   3830  CA  LEU D  35     -33.253 108.878  20.597  1.00 50.95           C  
ATOM   3831  C   LEU D  35     -32.482 110.038  19.960  1.00 52.10           C  
ATOM   3832  O   LEU D  35     -31.634 109.808  19.091  1.00 55.18           O  
ATOM   3833  CB  LEU D  35     -32.291 107.966  21.369  1.00 50.05           C  
ATOM   3834  CG  LEU D  35     -31.489 108.613  22.508  1.00 48.48           C  
ATOM   3835  CD1 LEU D  35     -32.395 109.117  23.621  1.00 47.83           C  
ATOM   3836  CD2 LEU D  35     -30.468 107.635  23.056  1.00 48.77           C  
ATOM   3837  N   VAL D  36     -32.788 111.262  20.395  1.00 51.64           N  
ATOM   3838  CA  VAL D  36     -32.190 112.490  19.839  1.00 52.23           C  
ATOM   3839  C   VAL D  36     -31.155 113.062  20.801  1.00 53.15           C  
ATOM   3840  O   VAL D  36     -30.095 113.507  20.374  1.00 54.49           O  
ATOM   3841  CB  VAL D  36     -33.266 113.564  19.503  1.00 52.77           C  
ATOM   3842  CG1 VAL D  36     -32.703 114.921  19.042  1.00 53.80           C  
ATOM   3843  CG2 VAL D  36     -34.217 113.067  18.360  1.00 55.24           C  
ATOM   3844  N   GLY D  37     -31.478 113.079  22.092  1.00 54.80           N  
ATOM   3845  CA  GLY D  37     -30.576 113.591  23.125  1.00 55.25           C  
ATOM   3846  C   GLY D  37     -30.636 112.753  24.387  1.00 55.75           C  
ATOM   3847  O   GLY D  37     -31.666 112.150  24.693  1.00 56.31           O  
ATOM   3848  N   LEU D  38     -29.521 112.711  25.108  1.00 55.65           N  
ATOM   3849  CA  LEU D  38     -29.399 111.903  26.318  1.00 55.99           C  
ATOM   3850  C   LEU D  38     -28.226 112.405  27.136  1.00 56.55           C  
ATOM   3851  O   LEU D  38     -27.123 112.543  26.611  1.00 61.30           O  
ATOM   3852  CB  LEU D  38     -29.192 110.430  25.961  1.00 55.85           C  
ATOM   3853  CG  LEU D  38     -28.890 109.425  27.072  1.00 56.17           C  
ATOM   3854  CD1 LEU D  38     -30.076 109.304  28.005  1.00 55.71           C  
ATOM   3855  CD2 LEU D  38     -28.554 108.066  26.484  1.00 57.20           C  
ATOM   3856  N   LYS D  39     -28.462 112.685  28.412  1.00 54.33           N  
ATOM   3857  CA  LYS D  39     -27.396 113.127  29.302  1.00 54.32           C  
ATOM   3858  C   LYS D  39     -27.757 112.883  30.756  1.00 53.69           C  
ATOM   3859  O   LYS D  39     -28.933 112.802  31.112  1.00 51.73           O  
ATOM   3860  CB  LYS D  39     -27.060 114.605  29.068  1.00 55.77           C  
ATOM   3861  CG  LYS D  39     -28.274 115.517  29.094  1.00 57.61           C  
ATOM   3862  CD  LYS D  39     -27.964 116.915  29.589  1.00 59.08           C  
ATOM   3863  CE  LYS D  39     -27.226 117.744  28.553  1.00 59.94           C  
ATOM   3864  NZ  LYS D  39     -27.125 119.155  29.022  1.00 58.92           N1+
ATOM   3865  N   PHE D  40     -26.722 112.796  31.583  1.00 54.43           N  
ATOM   3866  CA  PHE D  40     -26.835 112.422  32.983  1.00 56.71           C  
ATOM   3867  C   PHE D  40     -26.252 113.571  33.792  1.00 59.75           C  
ATOM   3868  O   PHE D  40     -25.071 113.885  33.664  1.00 61.49           O  
ATOM   3869  CB  PHE D  40     -26.054 111.131  33.195  1.00 55.98           C  
ATOM   3870  CG  PHE D  40     -26.230 110.500  34.543  1.00 52.86           C  
ATOM   3871  CD1 PHE D  40     -27.488 110.117  34.985  1.00 54.33           C  
ATOM   3872  CD2 PHE D  40     -25.132 110.227  35.342  1.00 50.30           C  
ATOM   3873  CE1 PHE D  40     -27.654 109.508  36.222  1.00 53.70           C  
ATOM   3874  CE2 PHE D  40     -25.289 109.622  36.580  1.00 50.62           C  
ATOM   3875  CZ  PHE D  40     -26.551 109.262  37.022  1.00 51.96           C  
ATOM   3876  N   MET D  41     -27.087 114.194  34.617  1.00 63.23           N  
ATOM   3877  CA  MET D  41     -26.732 115.442  35.277  1.00 66.59           C  
ATOM   3878  C   MET D  41     -27.480 115.609  36.586  1.00 67.79           C  
ATOM   3879  O   MET D  41     -28.619 115.162  36.713  1.00 65.38           O  
ATOM   3880  CB  MET D  41     -27.065 116.620  34.360  1.00 69.38           C  
ATOM   3881  CG  MET D  41     -28.511 116.663  33.873  1.00 71.94           C  
ATOM   3882  SD  MET D  41     -28.852 118.047  32.771  1.00 73.70           S  
ATOM   3883  CE  MET D  41     -28.770 119.418  33.918  1.00 76.12           C  
ATOM   3884  N   GLN D  42     -26.832 116.252  37.554  1.00 69.04           N  
ATOM   3885  CA  GLN D  42     -27.526 116.728  38.732  1.00 71.44           C  
ATOM   3886  C   GLN D  42     -28.066 118.111  38.403  1.00 72.70           C  
ATOM   3887  O   GLN D  42     -27.299 119.027  38.131  1.00 74.68           O  
ATOM   3888  CB  GLN D  42     -26.607 116.781  39.943  1.00 71.80           C  
ATOM   3889  CG  GLN D  42     -27.348 117.192  41.213  1.00 73.92           C  
ATOM   3890  CD  GLN D  42     -26.890 116.455  42.456  1.00 76.82           C  
ATOM   3891  OE1 GLN D  42     -26.429 115.311  42.390  1.00 74.86           O  
ATOM   3892  NE2 GLN D  42     -27.033 117.103  43.609  1.00 80.68           N  
ATOM   3893  N   ALA D  43     -29.390 118.241  38.403  1.00 75.00           N  
ATOM   3894  CA  ALA D  43     -30.059 119.491  38.050  1.00 73.48           C  
ATOM   3895  C   ALA D  43     -29.977 120.481  39.199  1.00 71.59           C  
ATOM   3896  O   ALA D  43     -30.188 120.113  40.356  1.00 69.34           O  
ATOM   3897  CB  ALA D  43     -31.517 119.230  37.691  1.00 75.59           C  
ATOM   3898  N   SER D  44     -29.680 121.736  38.864  1.00 72.57           N  
ATOM   3899  CA  SER D  44     -29.687 122.837  39.826  1.00 71.28           C  
ATOM   3900  C   SER D  44     -31.122 123.245  40.140  1.00 75.81           C  
ATOM   3901  O   SER D  44     -32.035 123.005  39.342  1.00 77.18           O  
ATOM   3902  CB  SER D  44     -28.936 124.039  39.261  1.00 67.76           C  
ATOM   3903  OG  SER D  44     -29.590 124.544  38.106  1.00 64.49           O  
ATOM   3904  N   GLU D  45     -31.313 123.883  41.292  1.00 79.85           N  
ATOM   3905  CA  GLU D  45     -32.642 124.339  41.721  1.00 83.02           C  
ATOM   3906  C   GLU D  45     -33.253 125.415  40.812  1.00 80.91           C  
ATOM   3907  O   GLU D  45     -34.476 125.462  40.654  1.00 84.32           O  
ATOM   3908  CB  GLU D  45     -32.591 124.851  43.158  1.00 85.41           C  
ATOM   3909  CG  GLU D  45     -32.378 123.749  44.179  1.00 87.45           C  
ATOM   3910  CD  GLU D  45     -31.647 124.243  45.405  1.00 90.27           C  
ATOM   3911  OE1 GLU D  45     -30.424 124.472  45.307  1.00 90.82           O  
ATOM   3912  OE2 GLU D  45     -32.296 124.405  46.457  1.00 93.13           O1-
ATOM   3913  N   ASP D  46     -32.413 126.267  40.227  1.00 75.89           N  
ATOM   3914  CA  ASP D  46     -32.881 127.278  39.270  1.00 78.54           C  
ATOM   3915  C   ASP D  46     -33.428 126.647  37.986  1.00 77.99           C  
ATOM   3916  O   ASP D  46     -34.422 127.127  37.438  1.00 75.73           O  
ATOM   3917  CB  ASP D  46     -31.770 128.282  38.934  1.00 79.43           C  
ATOM   3918  CG  ASP D  46     -31.441 129.211  40.097  1.00 79.99           C  
ATOM   3919  OD1 ASP D  46     -31.763 128.888  41.263  1.00 81.67           O  
ATOM   3920  OD2 ASP D  46     -30.840 130.272  39.840  1.00 80.24           O1-
ATOM   3921  N   LEU D  47     -32.779 125.578  37.521  1.00 77.74           N  
ATOM   3922  CA  LEU D  47     -33.275 124.795  36.381  1.00 75.94           C  
ATOM   3923  C   LEU D  47     -34.616 124.123  36.699  1.00 74.78           C  
ATOM   3924  O   LEU D  47     -35.552 124.194  35.903  1.00 72.71           O  
ATOM   3925  CB  LEU D  47     -32.251 123.731  35.972  1.00 75.07           C  
ATOM   3926  CG  LEU D  47     -32.574 122.872  34.741  1.00 74.55           C  
ATOM   3927  CD1 LEU D  47     -32.505 123.697  33.469  1.00 74.39           C  
ATOM   3928  CD2 LEU D  47     -31.621 121.695  34.649  1.00 74.11           C  
ATOM   3929  N   LEU D  48     -34.701 123.487  37.867  1.00 73.75           N  
ATOM   3930  CA  LEU D  48     -35.919 122.788  38.292  1.00 72.88           C  
ATOM   3931  C   LEU D  48     -37.096 123.734  38.535  1.00 73.28           C  
ATOM   3932  O   LEU D  48     -38.233 123.411  38.170  1.00 76.60           O  
ATOM   3933  CB  LEU D  48     -35.654 121.950  39.549  1.00 71.76           C  
ATOM   3934  CG  LEU D  48     -34.692 120.770  39.362  1.00 73.73           C  
ATOM   3935  CD1 LEU D  48     -34.220 120.236  40.707  1.00 74.96           C  
ATOM   3936  CD2 LEU D  48     -35.331 119.661  38.542  1.00 74.12           C  
ATOM   3937  N   LYS D  49     -36.819 124.891  39.140  1.00 70.34           N  
ATOM   3938  CA  LYS D  49     -37.843 125.916  39.382  1.00 70.44           C  
ATOM   3939  C   LYS D  49     -38.421 126.504  38.090  1.00 71.67           C  
ATOM   3940  O   LYS D  49     -39.618 126.778  38.017  1.00 70.51           O  
ATOM   3941  CB  LYS D  49     -37.299 127.029  40.284  1.00 71.04           C  
ATOM   3942  CG  LYS D  49     -37.249 126.629  41.750  1.00 71.88           C  
ATOM   3943  CD  LYS D  49     -36.539 127.655  42.610  1.00 71.96           C  
ATOM   3944  CE  LYS D  49     -36.577 127.234  44.068  1.00 72.72           C  
ATOM   3945  NZ  LYS D  49     -35.850 128.188  44.949  1.00 75.76           N1+
ATOM   3946  N   GLU D  50     -37.575 126.678  37.075  1.00 73.64           N  
ATOM   3947  CA  GLU D  50     -38.028 127.129  35.753  1.00 75.92           C  
ATOM   3948  C   GLU D  50     -38.829 126.041  35.041  1.00 76.56           C  
ATOM   3949  O   GLU D  50     -39.852 126.330  34.419  1.00 79.83           O  
ATOM   3950  CB  GLU D  50     -36.829 127.547  34.889  1.00 78.06           C  
ATOM   3951  CG  GLU D  50     -37.139 128.169  33.524  1.00 81.02           C  
ATOM   3952  CD  GLU D  50     -38.040 129.392  33.587  1.00 83.84           C  
ATOM   3953  OE1 GLU D  50     -38.756 129.675  32.592  1.00 88.61           O  
ATOM   3954  OE2 GLU D  50     -38.042 130.070  34.634  1.00 83.71           O1-
ATOM   3955  N   HIS D  51     -38.341 124.804  35.126  1.00 74.80           N  
ATOM   3956  CA  HIS D  51     -38.987 123.640  34.507  1.00 73.41           C  
ATOM   3957  C   HIS D  51     -40.385 123.395  35.078  1.00 73.13           C  
ATOM   3958  O   HIS D  51     -41.334 123.186  34.317  1.00 70.61           O  
ATOM   3959  CB  HIS D  51     -38.098 122.395  34.675  1.00 73.05           C  
ATOM   3960  CG  HIS D  51     -38.737 121.115  34.226  1.00 69.39           C  
ATOM   3961  ND1 HIS D  51     -38.852 120.755  32.901  1.00 65.51           N  
ATOM   3962  CD2 HIS D  51     -39.279 120.101  34.938  1.00 67.78           C  
ATOM   3963  CE1 HIS D  51     -39.446 119.578  32.816  1.00 65.30           C  
ATOM   3964  NE2 HIS D  51     -39.721 119.162  34.039  1.00 66.85           N  
ATOM   3965  N   TYR D  52     -40.505 123.436  36.406  1.00 73.54           N  
ATOM   3966  CA  TYR D  52     -41.793 123.248  37.090  1.00 76.54           C  
ATOM   3967  C   TYR D  52     -42.458 124.588  37.477  1.00 76.38           C  
ATOM   3968  O   TYR D  52     -43.136 124.671  38.505  1.00 74.23           O  
ATOM   3969  CB  TYR D  52     -41.613 122.353  38.334  1.00 74.80           C  
ATOM   3970  CG  TYR D  52     -41.215 120.913  38.039  1.00 73.77           C  
ATOM   3971  CD1 TYR D  52     -42.031 120.084  37.262  1.00 73.15           C  
ATOM   3972  CD2 TYR D  52     -40.039 120.369  38.563  1.00 73.70           C  
ATOM   3973  CE1 TYR D  52     -41.676 118.765  36.998  1.00 72.47           C  
ATOM   3974  CE2 TYR D  52     -39.681 119.050  38.309  1.00 72.14           C  
ATOM   3975  CZ  TYR D  52     -40.501 118.252  37.528  1.00 72.06           C  
ATOM   3976  OH  TYR D  52     -40.146 116.950  37.266  1.00 72.55           O  
ATOM   3977  N   VAL D  53     -42.312 125.612  36.632  1.00 76.00           N  
ATOM   3978  CA  VAL D  53     -42.799 126.965  36.956  1.00 75.32           C  
ATOM   3979  C   VAL D  53     -44.332 127.067  37.054  1.00 75.00           C  
ATOM   3980  O   VAL D  53     -44.851 127.862  37.841  1.00 73.82           O  
ATOM   3981  CB  VAL D  53     -42.252 128.029  35.970  1.00 75.95           C  
ATOM   3982  CG1 VAL D  53     -42.919 127.942  34.593  1.00 75.84           C  
ATOM   3983  CG2 VAL D  53     -42.386 129.427  36.558  1.00 76.07           C  
ATOM   3984  N   ASP D  54     -45.051 126.259  36.276  1.00 74.26           N  
ATOM   3985  CA  ASP D  54     -46.518 126.210  36.366  1.00 75.10           C  
ATOM   3986  C   ASP D  54     -47.019 125.699  37.723  1.00 74.72           C  
ATOM   3987  O   ASP D  54     -48.140 126.007  38.119  1.00 74.14           O  
ATOM   3988  CB  ASP D  54     -47.108 125.359  35.234  1.00 74.38           C  
ATOM   3989  CG  ASP D  54     -46.849 125.955  33.850  1.00 76.50           C  
ATOM   3990  OD1 ASP D  54     -47.016 125.240  32.836  1.00 80.36           O  
ATOM   3991  OD2 ASP D  54     -46.466 127.142  33.768  1.00 77.77           O1-
ATOM   3992  N   LEU D  55     -46.187 124.933  38.427  1.00 75.68           N  
ATOM   3993  CA  LEU D  55     -46.502 124.434  39.763  1.00 78.42           C  
ATOM   3994  C   LEU D  55     -45.894 125.275  40.906  1.00 80.19           C  
ATOM   3995  O   LEU D  55     -45.934 124.810  42.055  1.00 81.48           O  
ATOM   3996  CB  LEU D  55     -46.017 122.979  39.882  1.00 80.97           C  
ATOM   3997  CG  LEU D  55     -46.422 122.018  38.757  1.00 82.72           C  
ATOM   3998  CD1 LEU D  55     -45.735 120.672  38.942  1.00 85.07           C  
ATOM   3999  CD2 LEU D  55     -47.929 121.843  38.711  1.00 82.82           C  
ATOM   4000  N   LYS D  56     -45.323 126.461  40.606  1.00 80.68           N  
ATOM   4001  CA  LYS D  56     -44.639 127.317  41.653  1.00 83.05           C  
ATOM   4002  C   LYS D  56     -45.379 127.492  42.942  1.00 84.23           C  
ATOM   4003  O   LYS D  56     -44.771 127.331  43.973  1.00 86.44           O  
ATOM   4004  CB  LYS D  56     -44.137 128.719  41.256  1.00 84.88           C  
ATOM   4005  CG  LYS D  56     -45.137 129.797  40.914  1.00 88.58           C  
ATOM   4006  CD  LYS D  56     -44.521 130.820  39.965  1.00 89.87           C  
ATOM   4007  CE  LYS D  56     -45.288 132.119  39.968  1.00 90.25           C  
ATOM   4008  NZ  LYS D  56     -44.859 133.013  38.861  1.00 92.22           N1+
ATOM   4009  N   ASP D  57     -46.668 127.833  42.878  1.00 88.74           N  
ATOM   4010  CA  ASP D  57     -47.462 128.100  44.095  1.00 91.89           C  
ATOM   4011  C   ASP D  57     -48.411 126.945  44.447  1.00 86.07           C  
ATOM   4012  O   ASP D  57     -49.602 127.135  44.674  1.00 84.71           O  
ATOM   4013  CB  ASP D  57     -48.167 129.486  44.020  1.00 98.68           C  
ATOM   4014  CG  ASP D  57     -49.193 129.597  42.890  1.00 99.91           C  
ATOM   4015  OD1 ASP D  57     -49.902 130.633  42.850  1.00103.01           O  
ATOM   4016  OD2 ASP D  57     -49.291 128.674  42.056  1.00 95.88           O1-
ATOM   4017  N   ARG D  58     -47.844 125.741  44.493  1.00 84.03           N  
ATOM   4018  CA  ARG D  58     -48.536 124.539  44.947  1.00 83.83           C  
ATOM   4019  C   ARG D  58     -47.910 124.122  46.273  1.00 79.25           C  
ATOM   4020  O   ARG D  58     -46.727 124.381  46.490  1.00 76.94           O  
ATOM   4021  CB  ARG D  58     -48.370 123.413  43.931  1.00 87.20           C  
ATOM   4022  CG  ARG D  58     -48.902 123.713  42.534  1.00 91.28           C  
ATOM   4023  CD  ARG D  58     -50.417 123.917  42.485  1.00 95.06           C  
ATOM   4024  NE  ARG D  58     -51.091 123.129  41.450  1.00103.08           N  
ATOM   4025  CZ  ARG D  58     -51.572 121.887  41.581  1.00108.55           C  
ATOM   4026  NH1 ARG D  58     -51.469 121.214  42.723  1.00111.49           N1+
ATOM   4027  NH2 ARG D  58     -52.168 121.299  40.545  1.00108.87           N  
ATOM   4028  N   PRO D  59     -48.687 123.463  47.159  1.00 76.15           N  
ATOM   4029  CA  PRO D  59     -48.159 123.081  48.482  1.00 74.17           C  
ATOM   4030  C   PRO D  59     -46.936 122.143  48.461  1.00 71.45           C  
ATOM   4031  O   PRO D  59     -46.105 122.205  49.366  1.00 70.00           O  
ATOM   4032  CB  PRO D  59     -49.360 122.408  49.170  1.00 76.35           C  
ATOM   4033  CG  PRO D  59     -50.307 122.052  48.077  1.00 77.45           C  
ATOM   4034  CD  PRO D  59     -50.099 123.068  46.997  1.00 76.86           C  
ATOM   4035  N   PHE D  60     -46.835 121.302  47.434  1.00 71.61           N  
ATOM   4036  CA  PHE D  60     -45.719 120.347  47.291  1.00 71.15           C  
ATOM   4037  C   PHE D  60     -44.461 120.905  46.615  1.00 71.59           C  
ATOM   4038  O   PHE D  60     -43.415 120.260  46.669  1.00 75.14           O  
ATOM   4039  CB  PHE D  60     -46.174 119.080  46.540  1.00 71.57           C  
ATOM   4040  CG  PHE D  60     -46.772 119.346  45.175  1.00 71.29           C  
ATOM   4041  CD1 PHE D  60     -45.966 119.659  44.079  1.00 70.21           C  
ATOM   4042  CD2 PHE D  60     -48.152 119.270  44.983  1.00 70.88           C  
ATOM   4043  CE1 PHE D  60     -46.522 119.902  42.831  1.00 68.92           C  
ATOM   4044  CE2 PHE D  60     -48.709 119.512  43.737  1.00 70.39           C  
ATOM   4045  CZ  PHE D  60     -47.894 119.827  42.657  1.00 68.42           C  
ATOM   4046  N   PHE D  61     -44.563 122.078  45.980  1.00 71.66           N  
ATOM   4047  CA  PHE D  61     -43.501 122.616  45.100  1.00 70.34           C  
ATOM   4048  C   PHE D  61     -42.100 122.668  45.716  1.00 69.90           C  
ATOM   4049  O   PHE D  61     -41.119 122.378  45.029  1.00 71.05           O  
ATOM   4050  CB  PHE D  61     -43.885 124.013  44.584  1.00 69.30           C  
ATOM   4051  CG  PHE D  61     -42.865 124.628  43.652  1.00 67.03           C  
ATOM   4052  CD1 PHE D  61     -42.769 124.208  42.329  1.00 67.52           C  
ATOM   4053  CD2 PHE D  61     -41.995 125.623  44.101  1.00 64.69           C  
ATOM   4054  CE1 PHE D  61     -41.828 124.773  41.472  1.00 67.43           C  
ATOM   4055  CE2 PHE D  61     -41.056 126.190  43.248  1.00 64.15           C  
ATOM   4056  CZ  PHE D  61     -40.972 125.764  41.932  1.00 64.95           C  
ATOM   4057  N   ALA D  62     -42.008 123.059  46.987  1.00 69.40           N  
ATOM   4058  CA  ALA D  62     -40.727 123.079  47.708  1.00 69.77           C  
ATOM   4059  C   ALA D  62     -40.109 121.683  47.777  1.00 69.84           C  
ATOM   4060  O   ALA D  62     -38.940 121.489  47.426  1.00 66.68           O  
ATOM   4061  CB  ALA D  62     -40.915 123.629  49.109  1.00 67.75           C  
ATOM   4062  N   GLY D  63     -40.921 120.720  48.211  1.00 71.65           N  
ATOM   4063  CA  GLY D  63     -40.509 119.321  48.317  1.00 72.63           C  
ATOM   4064  C   GLY D  63     -40.210 118.644  46.987  1.00 73.44           C  
ATOM   4065  O   GLY D  63     -39.346 117.768  46.926  1.00 72.44           O  
ATOM   4066  N   LEU D  64     -40.937 119.035  45.934  1.00 73.18           N  
ATOM   4067  CA  LEU D  64     -40.664 118.590  44.554  1.00 71.78           C  
ATOM   4068  C   LEU D  64     -39.264 119.002  44.100  1.00 70.51           C  
ATOM   4069  O   LEU D  64     -38.486 118.165  43.628  1.00 71.12           O  
ATOM   4070  CB  LEU D  64     -41.705 119.165  43.579  1.00 70.07           C  
ATOM   4071  CG  LEU D  64     -41.520 118.903  42.076  1.00 68.99           C  
ATOM   4072  CD1 LEU D  64     -41.589 117.415  41.759  1.00 69.00           C  
ATOM   4073  CD2 LEU D  64     -42.556 119.670  41.269  1.00 68.69           C  
ATOM   4074  N   VAL D  65     -38.958 120.290  44.254  1.00 69.44           N  
ATOM   4075  CA  VAL D  65     -37.649 120.850  43.881  1.00 69.39           C  
ATOM   4076  C   VAL D  65     -36.499 120.198  44.668  1.00 70.08           C  
ATOM   4077  O   VAL D  65     -35.416 119.985  44.118  1.00 67.30           O  
ATOM   4078  CB  VAL D  65     -37.636 122.395  44.033  1.00 68.94           C  
ATOM   4079  CG1 VAL D  65     -36.230 122.978  43.897  1.00 69.59           C  
ATOM   4080  CG2 VAL D  65     -38.547 123.025  42.988  1.00 67.59           C  
ATOM   4081  N   LYS D  66     -36.749 119.863  45.933  1.00 72.47           N  
ATOM   4082  CA  LYS D  66     -35.755 119.197  46.777  1.00 75.33           C  
ATOM   4083  C   LYS D  66     -35.487 117.761  46.307  1.00 74.55           C  
ATOM   4084  O   LYS D  66     -34.334 117.368  46.102  1.00 73.57           O  
ATOM   4085  CB  LYS D  66     -36.220 119.172  48.239  1.00 76.34           C  
ATOM   4086  CG  LYS D  66     -35.060 119.115  49.219  1.00 78.92           C  
ATOM   4087  CD  LYS D  66     -35.433 118.460  50.536  1.00 82.37           C  
ATOM   4088  CE  LYS D  66     -34.174 118.084  51.299  1.00 86.77           C  
ATOM   4089  NZ  LYS D  66     -34.470 117.625  52.680  1.00 90.40           N1+
ATOM   4090  N   TYR D  67     -36.572 117.002  46.153  1.00 73.90           N  
ATOM   4091  CA  TYR D  67     -36.562 115.621  45.633  1.00 69.99           C  
ATOM   4092  C   TYR D  67     -35.820 115.508  44.307  1.00 67.22           C  
ATOM   4093  O   TYR D  67     -35.001 114.609  44.131  1.00 67.26           O  
ATOM   4094  CB  TYR D  67     -38.016 115.110  45.522  1.00 70.13           C  
ATOM   4095  CG  TYR D  67     -38.358 114.081  44.448  1.00 70.13           C  
ATOM   4096  CD1 TYR D  67     -39.367 114.346  43.513  1.00 70.04           C  
ATOM   4097  CD2 TYR D  67     -37.725 112.835  44.393  1.00 70.72           C  
ATOM   4098  CE1 TYR D  67     -39.717 113.419  42.544  1.00 70.61           C  
ATOM   4099  CE2 TYR D  67     -38.067 111.900  43.416  1.00 70.71           C  
ATOM   4100  CZ  TYR D  67     -39.067 112.196  42.496  1.00 70.99           C  
ATOM   4101  OH  TYR D  67     -39.434 111.288  41.523  1.00 68.32           O  
ATOM   4102  N   MET D  68     -36.105 116.430  43.394  1.00 64.09           N  
ATOM   4103  CA  MET D  68     -35.478 116.443  42.074  1.00 64.01           C  
ATOM   4104  C   MET D  68     -34.018 116.886  42.085  1.00 67.09           C  
ATOM   4105  O   MET D  68     -33.276 116.559  41.160  1.00 67.88           O  
ATOM   4106  CB  MET D  68     -36.282 117.329  41.118  1.00 62.00           C  
ATOM   4107  CG  MET D  68     -37.617 116.725  40.707  1.00 60.86           C  
ATOM   4108  SD  MET D  68     -37.449 115.331  39.572  1.00 55.88           S  
ATOM   4109  CE  MET D  68     -36.897 116.123  38.061  1.00 54.01           C  
ATOM   4110  N   HIS D  69     -33.623 117.658  43.098  1.00 71.22           N  
ATOM   4111  CA  HIS D  69     -32.222 118.066  43.297  1.00 72.63           C  
ATOM   4112  C   HIS D  69     -31.397 116.981  44.015  1.00 71.26           C  
ATOM   4113  O   HIS D  69     -30.174 116.950  43.875  1.00 68.34           O  
ATOM   4114  CB  HIS D  69     -32.177 119.389  44.083  1.00 73.66           C  
ATOM   4115  CG  HIS D  69     -30.818 120.023  44.153  1.00 75.47           C  
ATOM   4116  ND1 HIS D  69     -30.118 120.415  43.032  1.00 78.16           N  
ATOM   4117  CD2 HIS D  69     -30.045 120.356  45.213  1.00 74.29           C  
ATOM   4118  CE1 HIS D  69     -28.965 120.948  43.398  1.00 74.51           C  
ATOM   4119  NE2 HIS D  69     -28.895 120.923  44.716  1.00 73.68           N  
ATOM   4120  N   SER D  70     -32.074 116.088  44.749  1.00 67.54           N  
ATOM   4121  CA  SER D  70     -31.424 115.139  45.666  1.00 67.48           C  
ATOM   4122  C   SER D  70     -30.436 114.160  45.022  1.00 66.62           C  
ATOM   4123  O   SER D  70     -29.430 113.804  45.637  1.00 75.58           O  
ATOM   4124  CB  SER D  70     -32.475 114.348  46.458  1.00 68.12           C  
ATOM   4125  OG  SER D  70     -33.163 113.426  45.632  1.00 68.45           O  
ATOM   4126  N   GLY D  71     -30.732 113.716  43.807  1.00 63.08           N  
ATOM   4127  CA  GLY D  71     -29.833 112.838  43.051  1.00 61.46           C  
ATOM   4128  C   GLY D  71     -29.768 113.253  41.595  1.00 58.80           C  
ATOM   4129  O   GLY D  71     -30.386 114.244  41.208  1.00 58.93           O  
ATOM   4130  N   PRO D  72     -29.010 112.505  40.776  1.00 57.23           N  
ATOM   4131  CA  PRO D  72     -28.959 112.807  39.346  1.00 57.49           C  
ATOM   4132  C   PRO D  72     -30.173 112.308  38.586  1.00 57.16           C  
ATOM   4133  O   PRO D  72     -30.848 111.386  39.039  1.00 57.77           O  
ATOM   4134  CB  PRO D  72     -27.728 112.047  38.867  1.00 56.18           C  
ATOM   4135  CG  PRO D  72     -27.606 110.917  39.812  1.00 56.52           C  
ATOM   4136  CD  PRO D  72     -28.057 111.444  41.142  1.00 56.93           C  
ATOM   4137  N   VAL D  73     -30.406 112.911  37.422  1.00 55.50           N  
ATOM   4138  CA  VAL D  73     -31.487 112.531  36.514  1.00 52.88           C  
ATOM   4139  C   VAL D  73     -30.909 112.196  35.145  1.00 52.32           C  
ATOM   4140  O   VAL D  73     -29.850 112.705  34.771  1.00 52.10           O  
ATOM   4141  CB  VAL D  73     -32.561 113.649  36.366  1.00 51.59           C  
ATOM   4142  CG1 VAL D  73     -33.231 113.909  37.701  1.00 51.19           C  
ATOM   4143  CG2 VAL D  73     -31.991 114.945  35.796  1.00 51.55           C  
ATOM   4144  N   VAL D  74     -31.608 111.335  34.410  1.00 50.45           N  
ATOM   4145  CA  VAL D  74     -31.298 111.096  33.009  1.00 49.02           C  
ATOM   4146  C   VAL D  74     -32.258 111.960  32.201  1.00 48.85           C  
ATOM   4147  O   VAL D  74     -33.450 111.673  32.141  1.00 50.47           O  
ATOM   4148  CB  VAL D  74     -31.451 109.616  32.615  1.00 46.81           C  
ATOM   4149  CG1 VAL D  74     -31.016 109.406  31.177  1.00 45.18           C  
ATOM   4150  CG2 VAL D  74     -30.628 108.724  33.531  1.00 47.47           C  
ATOM   4151  N   ALA D  75     -31.729 113.025  31.607  1.00 47.39           N  
ATOM   4152  CA  ALA D  75     -32.494 113.877  30.707  1.00 47.72           C  
ATOM   4153  C   ALA D  75     -32.408 113.307  29.303  1.00 48.82           C  
ATOM   4154  O   ALA D  75     -31.334 112.882  28.876  1.00 53.02           O  
ATOM   4155  CB  ALA D  75     -31.951 115.294  30.734  1.00 48.54           C  
ATOM   4156  N   MET D  76     -33.537 113.296  28.592  1.00 50.32           N  
ATOM   4157  CA  MET D  76     -33.630 112.707  27.247  1.00 50.96           C  
ATOM   4158  C   MET D  76     -34.514 113.515  26.302  1.00 50.17           C  
ATOM   4159  O   MET D  76     -35.379 114.274  26.740  1.00 49.41           O  
ATOM   4160  CB  MET D  76     -34.214 111.295  27.320  1.00 51.72           C  
ATOM   4161  CG  MET D  76     -33.538 110.371  28.307  1.00 52.52           C  
ATOM   4162  SD  MET D  76     -34.078 108.669  28.089  1.00 52.44           S  
ATOM   4163  CE  MET D  76     -35.602 108.693  29.021  1.00 53.56           C  
ATOM   4164  N   VAL D  77     -34.294 113.321  25.004  1.00 49.23           N  
ATOM   4165  CA  VAL D  77     -35.146 113.883  23.955  1.00 51.34           C  
ATOM   4166  C   VAL D  77     -35.406 112.784  22.934  1.00 51.88           C  
ATOM   4167  O   VAL D  77     -34.459 112.182  22.418  1.00 55.00           O  
ATOM   4168  CB  VAL D  77     -34.490 115.096  23.250  1.00 52.49           C  
ATOM   4169  CG1 VAL D  77     -35.393 115.662  22.157  1.00 53.19           C  
ATOM   4170  CG2 VAL D  77     -34.166 116.189  24.253  1.00 52.49           C  
ATOM   4171  N   TRP D  78     -36.685 112.523  22.659  1.00 49.67           N  
ATOM   4172  CA  TRP D  78     -37.109 111.470  21.734  1.00 46.23           C  
ATOM   4173  C   TRP D  78     -37.916 112.074  20.595  1.00 46.38           C  
ATOM   4174  O   TRP D  78     -38.695 113.000  20.814  1.00 48.15           O  
ATOM   4175  CB  TRP D  78     -37.951 110.424  22.471  1.00 43.26           C  
ATOM   4176  CG  TRP D  78     -37.154 109.601  23.421  1.00 41.00           C  
ATOM   4177  CD1 TRP D  78     -36.914 109.865  24.732  1.00 40.36           C  
ATOM   4178  CD2 TRP D  78     -36.479 108.378  23.127  1.00 39.73           C  
ATOM   4179  NE1 TRP D  78     -36.132 108.881  25.279  1.00 40.04           N  
ATOM   4180  CE2 TRP D  78     -35.850 107.954  24.313  1.00 39.63           C  
ATOM   4181  CE3 TRP D  78     -36.351 107.592  21.973  1.00 39.52           C  
ATOM   4182  CZ2 TRP D  78     -35.099 106.776  24.384  1.00 40.16           C  
ATOM   4183  CZ3 TRP D  78     -35.603 106.422  22.041  1.00 38.77           C  
ATOM   4184  CH2 TRP D  78     -34.987 106.026  23.239  1.00 39.03           C  
ATOM   4185  N   GLU D  79     -37.753 111.525  19.395  1.00 45.98           N  
ATOM   4186  CA  GLU D  79     -38.435 112.026  18.207  1.00 47.23           C  
ATOM   4187  C   GLU D  79     -39.406 111.007  17.596  1.00 47.47           C  
ATOM   4188  O   GLU D  79     -39.100 109.814  17.525  1.00 48.15           O  
ATOM   4189  CB  GLU D  79     -37.407 112.440  17.152  1.00 48.00           C  
ATOM   4190  CG  GLU D  79     -37.958 112.496  15.730  1.00 49.03           C  
ATOM   4191  CD  GLU D  79     -36.948 112.981  14.730  1.00 49.69           C  
ATOM   4192  OE1 GLU D  79     -36.539 112.164  13.872  1.00 50.56           O  
ATOM   4193  OE2 GLU D  79     -36.544 114.163  14.817  1.00 49.64           O1-
ATOM   4194  N   GLY D  80     -40.545 111.506  17.107  1.00 47.04           N  
ATOM   4195  CA  GLY D  80     -41.457 110.718  16.269  1.00 47.66           C  
ATOM   4196  C   GLY D  80     -42.871 111.256  16.214  1.00 47.99           C  
ATOM   4197  O   GLY D  80     -43.210 112.206  16.925  1.00 48.82           O  
ATOM   4198  N   LEU D  81     -43.701 110.625  15.385  1.00 48.79           N  
ATOM   4199  CA  LEU D  81     -45.108 111.008  15.235  1.00 50.55           C  
ATOM   4200  C   LEU D  81     -45.857 110.941  16.570  1.00 51.31           C  
ATOM   4201  O   LEU D  81     -45.955 109.872  17.184  1.00 50.72           O  
ATOM   4202  CB  LEU D  81     -45.807 110.100  14.222  1.00 51.77           C  
ATOM   4203  CG  LEU D  81     -47.272 110.407  13.885  1.00 54.29           C  
ATOM   4204  CD1 LEU D  81     -47.378 111.676  13.058  1.00 55.15           C  
ATOM   4205  CD2 LEU D  81     -47.914 109.237  13.149  1.00 55.73           C  
ATOM   4206  N   ASN D  82     -46.390 112.087  16.997  1.00 52.50           N  
ATOM   4207  CA  ASN D  82     -47.134 112.211  18.256  1.00 55.95           C  
ATOM   4208  C   ASN D  82     -46.353 111.659  19.453  1.00 54.61           C  
ATOM   4209  O   ASN D  82     -46.924 111.041  20.355  1.00 53.03           O  
ATOM   4210  CB  ASN D  82     -48.519 111.557  18.132  1.00 57.92           C  
ATOM   4211  CG  ASN D  82     -49.398 112.246  17.064  1.00 61.42           C  
ATOM   4212  OD1 ASN D  82     -49.664 111.632  16.047  1.00 63.19           O  
ATOM   4213  ND2 ASN D  82     -49.785 113.531  17.242  1.00 64.52           N  
ATOM   4214  N   VAL D  83     -45.046 111.908  19.459  1.00 52.65           N  
ATOM   4215  CA  VAL D  83     -44.190 111.431  20.534  1.00 52.83           C  
ATOM   4216  C   VAL D  83     -44.566 112.060  21.881  1.00 51.96           C  
ATOM   4217  O   VAL D  83     -44.441 111.407  22.914  1.00 53.52           O  
ATOM   4218  CB  VAL D  83     -42.680 111.598  20.206  1.00 55.12           C  
ATOM   4219  CG1 VAL D  83     -42.232 113.065  20.204  1.00 57.14           C  
ATOM   4220  CG2 VAL D  83     -41.827 110.774  21.148  1.00 56.95           C  
ATOM   4221  N   VAL D  84     -45.055 113.298  21.871  1.00 52.81           N  
ATOM   4222  CA  VAL D  84     -45.463 113.980  23.107  1.00 53.83           C  
ATOM   4223  C   VAL D  84     -46.690 113.299  23.717  1.00 55.79           C  
ATOM   4224  O   VAL D  84     -46.685 112.949  24.899  1.00 53.00           O  
ATOM   4225  CB  VAL D  84     -45.766 115.475  22.869  1.00 52.85           C  
ATOM   4226  CG1 VAL D  84     -46.306 116.133  24.128  1.00 53.26           C  
ATOM   4227  CG2 VAL D  84     -44.514 116.218  22.418  1.00 52.64           C  
ATOM   4228  N   LYS D  85     -47.728 113.114  22.902  1.00 61.07           N  
ATOM   4229  CA  LYS D  85     -48.977 112.495  23.359  1.00 64.29           C  
ATOM   4230  C   LYS D  85     -48.780 111.016  23.692  1.00 62.30           C  
ATOM   4231  O   LYS D  85     -49.152 110.579  24.781  1.00 65.50           O  
ATOM   4232  CB  LYS D  85     -50.090 112.647  22.318  1.00 67.69           C  
ATOM   4233  CG  LYS D  85     -51.470 112.328  22.870  1.00 75.16           C  
ATOM   4234  CD  LYS D  85     -52.508 112.164  21.769  1.00 85.13           C  
ATOM   4235  CE  LYS D  85     -53.845 111.705  22.349  1.00 89.19           C  
ATOM   4236  NZ  LYS D  85     -54.953 111.740  21.352  1.00 90.35           N1+
ATOM   4237  N   THR D  86     -48.201 110.261  22.756  1.00 57.17           N  
ATOM   4238  CA  THR D  86     -47.946 108.829  22.953  1.00 53.92           C  
ATOM   4239  C   THR D  86     -46.950 108.580  24.095  1.00 54.21           C  
ATOM   4240  O   THR D  86     -47.089 107.617  24.849  1.00 51.49           O  
ATOM   4241  CB  THR D  86     -47.422 108.154  21.671  1.00 51.25           C  
ATOM   4242  OG1 THR D  86     -48.157 108.626  20.537  1.00 49.70           O  
ATOM   4243  CG2 THR D  86     -47.570 106.647  21.758  1.00 51.08           C  
ATOM   4244  N   GLY D  87     -45.949 109.451  24.213  1.00 55.52           N  
ATOM   4245  CA  GLY D  87     -44.987 109.394  25.313  1.00 55.94           C  
ATOM   4246  C   GLY D  87     -45.668 109.517  26.659  1.00 55.24           C  
ATOM   4247  O   GLY D  87     -45.399 108.740  27.567  1.00 55.00           O  
ATOM   4248  N   ARG D  88     -46.553 110.501  26.774  1.00 56.17           N  
ATOM   4249  CA  ARG D  88     -47.395 110.664  27.964  1.00 57.28           C  
ATOM   4250  C   ARG D  88     -48.225 109.419  28.297  1.00 52.62           C  
ATOM   4251  O   ARG D  88     -48.341 109.051  29.462  1.00 48.06           O  
ATOM   4252  CB  ARG D  88     -48.316 111.881  27.808  1.00 59.63           C  
ATOM   4253  CG  ARG D  88     -47.696 113.178  28.340  1.00 62.74           C  
ATOM   4254  CD  ARG D  88     -48.192 113.432  29.746  1.00 65.32           C  
ATOM   4255  NE  ARG D  88     -47.509 114.545  30.420  1.00 65.82           N  
ATOM   4256  CZ  ARG D  88     -47.855 115.054  31.603  1.00 66.53           C  
ATOM   4257  NH1 ARG D  88     -48.893 114.570  32.276  1.00 68.72           N1+
ATOM   4258  NH2 ARG D  88     -47.159 116.060  32.127  1.00 68.60           N  
ATOM   4259  N   VAL D  89     -48.784 108.785  27.267  1.00 50.65           N  
ATOM   4260  CA  VAL D  89     -49.573 107.555  27.422  1.00 49.63           C  
ATOM   4261  C   VAL D  89     -48.705 106.409  27.953  1.00 48.72           C  
ATOM   4262  O   VAL D  89     -49.110 105.705  28.881  1.00 47.90           O  
ATOM   4263  CB  VAL D  89     -50.284 107.148  26.098  1.00 48.64           C  
ATOM   4264  CG1 VAL D  89     -50.905 105.759  26.190  1.00 48.99           C
[truncated: 266,086 more chars]
